# Supplementary material for: Single-nucleotide resolution detection of Topo IV cleavage activity in the Escherichia coli genome with Topo-Seq
Source: Front Microbiol. 2023 Apr 6;14:1160736. doi: 10.3389/fmicb.2023.1160736 (PMC10117906; doi:10.3389/fmicb.2023.1160736)
Supplement: Supplementary file 1 [file Table_1.xlsx]

## Sheet: Final_dataset_3127_TCSs
TCS coordinate, bp	N3E	Sequence score
1553	10.1808	3.97702
1905	28.4408	6.67069
2303	18.8894	6.08381
3654	20.7365	5.89528
4861	10.071	7.27055
5488	9.2602	8.46805
5506	7.41185	7.41806
6306	11.9152	7.66228
11193	9.88228	6.91377
11269	15.4541	4.78644
11408	23.485	7.8612
14374	10.9642	8.73161
14826	8.70429	3.53273
15380	22.7227	6.62711
16590	7.55328	6.29572
17316	11.9801	1.53757
17328	10.9116	2.67916
18849	20.8918	5.06589
18850	6.25041	-1.58857
18851	30.1692	3.97498
19077	10.2213	0.81486
20731	32.7133	5.41693
22556	16.7003	-6.14122
24114	14.0743	7.71144
24865	29.2309	8.05751
25448	10.8725	5.86366
26767	19.9889	6.1464
27075	9.11425	-1.32624
28523	10.8993	4.88628
28903	8.97302	2.40865
28958	8.75679	9.35495
29027	31.8897	7.62059
30567	20.0623	5.83775
30703	13.2353	4.80354
37999	12.1441	6.91089
40276	9.27341	-2.23412
42627	10.0838	3.02133
44092	17.1977	7.45797
44218	5.50675	5.77353
44247	16.2088	4.87244
45522	7.83423	9.65144
47398	16.8551	5.62052
50612	6.96673	5.12214
50864	11.4787	6.09256
51314	11.9623	5.23853
52405	16.1078	7.20173
53440	16.7924	0.305311
54026	10.3644	6.12479
56205	7.90764	5.51507
57398	27.3928	6.34453
59418	15.2751	8.24576
61631	11.2114	5.11916
61860	9.97332	3.69479
61899	6.32319	3.86804
62036	13.3439	2.76119
62469	7.47403	-2.25605
62694	12.408	6.88151
74266	8.84138	5.91003
76549	14.806	8.03945
87593	11.719	6.77979
88585	7.74937	6.00531
90198	10.3493	8.66376
90980	12.1906	2.50076
91663	8.5503	5.52378
94001	18.9502	3.67366
96120	12.0392	7.34199
97128	18.3155	6.31615
98010	15.8226	5.67099
101571	11.6996	6.12529
102264	8.86662	6.31905
103924	15.1947	3.0233
107068	11.7677	0.842969
108554	13.512	4.58706
110488	15.7023	6.54958
110969	12.1909	3.03764
112061	12.1372	6.18329
113028	9.59535	-0.55691
115324	6.96507	5.53063
115908	9.04237	1.73154
116006	5.49496	5.34101
118316	11.4307	2.44942
118462	31.825	7.4184
121047	11.3441	8.03295
126672	19.1602	5.33835
129766	23.3839	5.91073
133789	8.68922	5.95691
138219	21.3745	4.79986
143913	8.97591	5.02407
144141	10.669	7.68704
145248	13.6306	3.669
145250	10.7991	6.59039
146913	15.9378	-1.40715
153097	9.26766	5.97559
154482	15.4414	0.920209
155317	18.6514	4.87708
157457	15.9029	1.52545
159030	17.9384	4.58202
159303	8.18951	1.92058
160219	15.5082	6.08783
160489	6.4746	8.91495
161414	45.0299	6.71034
162424	11.496	5.03289
165573	11.4082	1.5938
166334	10.517	3.30194
168361	6.20436	4.59558
171551	10.2178	0.91563
174006	6.74149	2.98838
174686	7.55262	4.93435
177228	9.78693	6.87406
179232	12.547	4.13808
179536	6.9555	8.06796
187510	8.38124	7.02344
188071	8.25907	5.17928
189805	7.13872	4.74346
190280	9.54728	5.89315
190895	19.2065	7.98455
191303	12.4083	6.59291
196683	8.55376	6.22606
197508	7.40657	2.86565
200745	48.0246	4.34206
200790	27.6806	9.13612
201254	12.4621	7.80546
202535	7.84384	4.19112
202712	13.3995	9.23517
205155	8.64438	5.26129
206472	9.57151	3.42852
208142	9.07284	4.46059
211525	11.2105	5.80792
212726	28.8591	8.7139
212989	8.66727	-0.374622
213160	8.99987	4.06034
214293	27.1823	1.01041
218816	16.992	1.58461
219125	8.92564	2.38497
220066	12.0794	4.65202
222612	7.42196	6.48002
222840	24.3124	7.94078
223658	16.3355	3.83516
224698	16.7999	1.54959
225336	14.1204	2.3808
229408	9.17759	3.90922
229502	7.93838	1.07299
229561	24.2164	3.74026
229794	14.9547	0.372626
229982	21.6241	5.59222
230038	6.22282	5.11303
230265	21.0995	2.99311
231174	8.47403	5.36462
231655	14.0875	3.04217
233688	31.3011	1.84795
235632	12.4407	8.8452
236068	62.3613	4.6528
236353	20.3834	4.18078
237959	12.7603	2.45471
242111	64.5869	6.18804
242715	28.5718	5.49411
243964	21.4428	6.4964
244299	8.85938	1.76521
244551	20.2866	3.71323
244641	15.8007	3.28248
246052	8.89505	7.14163
246713	16.4861	6.39841
250137	25.2098	3.37423
250281	9.49717	1.87671
250317	7.52602	5.99196
252183	7.9025	2.28964
252195	6.6267	-0.0799633
254585	13.0805	5.95002
255017	5.9563	7.49368
258118	7.3585	2.74112
259312	14.337	5.68476
261145	9.17582	3.40012
261475	8.60185	0.96271
262297	10.5576	2.61983
265037	7.53814	3.08634
266065	10.0137	4.35879
268648	10.0008	-0.665604
269187	17.5672	5.16877
271329	18.4675	6.00261
271707	8.48651	6.02792
273767	13.1541	7.8624
274257	27.9579	6.98433
372320	8.80723	3.61066
372387	7.92447	4.37584
376312	23.9359	9.07746
381111	5.45986	0.969313
383129	15.7738	5.28587
386202	6.82555	4.32336
388545	8.22756	4.42399
394488	11.4399	8.40334
395152	19.6585	4.52869
395662	10.4874	3.49589
402693	14.3552	3.63086
404537	11.5101	5.18852
405343	8.31268	4.6434
406668	7.959	5.23103
408679	9.38169	4.01778
409091	10.7475	1.37141
410262	8.95791	2.45513
412273	8.03019	3.97566
413611	12.102	7.34477
415476	10.7884	5.8128
419328	12.1713	2.63733
422913	6.93276	2.92094
426939	13.0023	7.6987
427286	11.3927	6.18289
427454	13.7037	6.09946
428537	10.3507	6.75889
429408	12.8917	7.27155
429948	18.5499	8.71519
431648	6.1705	2.91528
433780	11.2621	4.11287
433843	18.7233	6.8278
434173	15.2287	6.06389
435628	8.1052	6.39755
436223	7.48366	5.54525
436806	11.1695	4.81371
436827	13.7686	2.58994
436935	12.3271	4.77525
437089	33.5917	3.10245
437258	22.4274	3.18978
438051	9.91339	4.50859
443436	8.97275	8.16613
444599	8.46362	4.04931
445134	11.8291	3.94739
446986	31.13	-0.0741336
447850	16.5311	3.3903
449612	8.86151	5.37023
449961	7.66365	5.3385
449973	13.8191	6.2589
452040	15.8742	5.84377
454383	9.526	4.86521
456148	13.5343	9.9672
456217	13.6444	7.42047
456382	8.52099	-0.319971
457047	8.62967	6.28409
458791	12.947	5.07782
460286	19.4468	9.2972
463280	11.7665	4.5261
463370	7.98401	8.36795
470448	14.2716	-1.16478
474324	15.9848	7.06078
476740	15.7418	5.48575
478096	19.294	7.34302
478290	11.5574	-1.36735
481038	18.0055	7.26785
481968	9.77965	7.12357
483967	11.8214	8.57428
485903	9.65683	5.8482
488785	12.295	5.06819
489734	13.3502	3.84223
491567	8.15669	4.95083
492754	10.7003	6.69974
493763	13.2717	7.52188
494248	9.05337	3.91981
495891	14.1588	5.90884
496776	12.883	8.37634
497050	6.12267	0.755367
497533	8.82883	2.68011
497577	6.82136	3.51824
498275	16.4815	6.23905
499012	11.7084	-0.162834
500322	7.26594	3.92997
504299	10.4578	6.97143
505319	25.7892	3.83273
505907	20.8768	6.36205
512110	12.7705	7.27885
512180	9.74097	0.574885
514421	13.2324	5.18153
517605	13.4628	8.25596
517650	16.1954	9.00708
518069	6.69205	2.87332
518130	10.1361	4.03019
530423	10.7547	0.409584
532800	19.7757	4.99158
533387	11.3126	4.29553
535212	11.0965	6.52819
539561	42.0807	7.73
545241	13.6386	7.34101
549593	7.89172	2.63221
550317	9.04085	3.13228
557029	24.9633	4.12714
564123	11.6953	3.668
564150	43.009	5.73632
574402	11.9483	7.8624
574892	31.8794	6.98433
580448	9.723	5.12595
581158	11.8544	1.44364
581354	10.2679	5.57724
586095	26.9863	6.73028
591408	10.7346	6.00875
597076	11.8348	7.59046
600271	6.47395	0.423762
605731	5.65258	-7.42534
605732	18.4758	7.45699
606310	6.14731	2.68025
625682	16.7094	1.55799
626662	13.3918	5.31694
634491	11.4603	2.05549
637387	17.0952	3.64731
639524	6.72849	1.74037
642971	18.914	8.91367
654814	17.0398	7.8624
659140	35.6878	5.68611
660218	11.2063	-1.588
660706	5.97165	5.43394
661228	9.46826	2.53929
661699	10.4483	1.65102
661769	15.8234	4.36018
662012	28.5588	4.78449
665296	17.3787	5.93675
665462	9.67019	5.74459
666514	23.851	5.73087
667182	29.1056	5.02467
668723	15.0852	7.00632
670466	18.5017	5.55309
673282	7.33678	4.76263
673487	11.452	3.68626
674968	11.2536	10.3708
680541	7.70333	7.2624
681371	18.2882	3.51834
683446	7.48477	3.35556
683773	10.8199	5.88813
685232	9.37866	-0.258134
686059	30.2649	2.2973
686336	11.0538	-0.998251
687407	9.89369	9.30435
687765	22.8968	0.909027
687766	17.461	3.83489
688751	10.8631	4.82578
688883	17.8532	9.03005
689983	12.2302	7.8624
690473	40.74	6.98433
693681	9.66394	4.87202
697196	18.9249	3.68049
701870	39.1024	5.20076
702372	6.37699	7.1728
702477	7.15432	6.95215
703785	7.33637	4.63946
706170	10.8373	11.9096
707794	8.93747	4.18207
709138	7.2125	-0.846524
709716	47.4261	2.39546
710190	41.6865	0.98308
711236	10.2741	01,05,5948
711757	23.965	7.69311
711763	13.9409	9.3416
713217	9.13753	4.3792
713442	13.7385	5.06706
713760	10.9195	8.41521
714970	12.8045	3.6725
716381	39.9588	11.2268
718666	7.25298	2.73958
719636	12.2251	5.94246
721129	6.53109	-0.488137
721544	12.1277	5.73259
728492	9.00202	3.37341
740370	7.70467	6.58751
741593	9.27718	1.7335
746162	7.56887	-0.401538
746406	13.5403	0.343782
753137	10.8733	3.81422
756824	6.56681	7.41936
757279	8.92204	7.28638
758372	7.67185	2.58504
759064	17.1116	6.51187
761023	18.865	6.37473
764928	15.6696	5.13372
765102	14.1729	9.212
766645	5.76773	-1.82126
767029	11.9271	3.72025
770912	16.1546	3.39844
771641	9.85793	6.15451
774680	28.9609	9.51413
774686	21.4466	6.52969
775893	14.4836	6.69998
777139	48.7333	10.3817
780249	13.8273	6.01868
781291	10.0265	5.63821
784015	10.0985	8.65667
784527	9.58221	3.76641
784769	7.78643	2.82598
785128	11.0603	6.27154
785406	7.28239	4.28888
786722	10.6305	7.23578
787616	6.06498	4.60877
787887	6.56897	4.82421
790224	8.32026	4.07249
791447	14.414	5.82472
791607	13.5073	3.39786
793122	12.9803	5.34924
810017	10.9563	3.77804
810174	12.2007	7.74667
811465	12.8504	5.10178
816449	9.76353	8.82059
816871	9.45679	5.7075
817875	14.5123	2.87326
820066	18.2088	4.29011
821715	7.41926	0.629357
823058	8.89916	6.59187
823916	7.63459	11.2844
823955	21.2329	6.07954
824015	10.9269	5.79712
825250	19.8023	-0.965143
825584	8.37737	3.3251
826002	35.508	4.65181
827462	11.7134	2.7052
828691	10.9068	7.11042
831689	8.79691	7.41731
833261	24.7625	5.2259
834386	68.655	5.43352
834387	10.1891	-1.53599
834958	17.8811	4.41917
835129	12.3019	8.91124
836481	12.0641	6.15302
836878	10.2275	6.78496
837730	10.7657	0.339001
838638	66.1285	9.60055
845887	13.1968	8.03537
846268	9.52666	4.76886
846548	55.9148	5.31191
846612	14.0849	2.83968
846872	10.3604	-0.445156
847314	21.2356	6.19212
848072	37.954	6.43746
849323	16.5087	11.1805
850805	7.2659	-1.45867
851446	9.59189	5.31068
851524	9.59846	5.21071
852782	5.73553	1.96498
853020	8.19808	0.298307
853044	14.5972	2.85049
853084	18.0291	6.9445
854786	29.2609	6.11308
857098	10.3759	3.35364
857902	7.45725	9.99634
858010	7.61979	2.97753
859998	15.3533	5.67138
860523	24.8084	5.24681
861578	7.69777	3.3449
861921	32.5938	4.31318
862797	10.9931	-0.561845
864728	13.9884	4.79608
864872	28.3045	6.67616
865227	32.8276	3.11149
865259	18.512	6.49163
867095	7.64634	4.40888
869435	7.56159	3.92673
870071	8.04244	6.70349
871665	6.9406	-0.472262
872384	18.0346	6.55461
873074	12.1493	-1.20575
873243	9.02383	-5.08105
873286	14.3065	1.0456
877493	6.70889	0.919686
879003	6.48265	3.87007
880055	8.47675	3.62573
882297	19.7587	4.59715
882384	24.1535	5.82206
882504	21.7531	6.76069
883621	8.45654	1.33055
884784	6.67283	1.60401
884860	32.6779	8.88789
888726	11.652	1.21759
890166	9.56265	9.91975
892168	11.9026	1.81743
892262	15.6914	1.99384
892433	40.3547	1.92174
892960	47.6177	4.7521
893171	7.45759	2.74705
893761	7.22094	3.49229
896400	45.7219	7.54111
896402	15.9967	3.56612
896576	11.7062	4.03456
897007	16.8586	1.90086
897148	9.93712	7.51074
897187	19.7538	7.11025
898493	11.3244	4.54583
898619	9.60329	3.73514
898941	7.26128	7.70204
899202	19.9497	9.32441
899291	9.82436	-0.136567
899592	8.31673	3.71041
899960	24.6613	8.38914
900296	9.7845	-0.114637
901137	9.48582	5.46708
902123	12.7314	1.92886
902664	9.95129	5.51936
903149	19.3847	4.14004
906312	15.6815	1.36195
907487	8.66586	6.65113
911947	36.7415	5.74837
913259	7.07999	3.02488
915481	18.7729	2.26205
915573	11.4584	7.31494
917959	26.1497	6.14393
918486	16.504	2.86893
919470	32.1106	4.6984
919536	13.6787	1.75722
920973	10.7805	3.30155
922066	11.6105	5.77847
924809	6.79941	2.21531
925482	10.0833	6.99445
926025	9.4196	6.36906
926097	23.4574	3.40992
926211	8.2599	3.88458
926412	12.7383	6.74825
926511	24.887	7.9724
926615	8.94257	6.75177
926777	46.5348	5.67543
926862	11.2134	7.4177
927356	21.0741	6.64326
928558	18.5799	8.23289
928588	8.62323	5.94722
928879	10.1367	4.34002
929531	8.21676	-6.0616
929673	9.68664	5.05425
930030	10.1575	5.28837
930779	11.3751	2.78068
932723	15.3135	3.18751
933898	17.7154	4.5342
935493	8.31764	6.88621
936890	19.6544	1.80198
937778	19.0403	6.03901
938445	8.30208	7.07773
938478	13.3376	7.02258
938709	43.2015	7.54558
938710	9.70901	-8.61203
940342	11.1565	-1.2589
941064	20.7492	5.6637
942020	9.06806	2.50218
942239	10.5312	2.15144
942289	33.8947	2.93818
942494	7.54651	-1.49215
942644	34.6609	-0.857444
943565	19.8519	2.89901
943769	12.0424	2.13654
944257	7.58428	5.80687
944796	17.6038	4.91618
945291	17.6658	-1.59151
945814	67.2332	4.36591
947514	8.42343	-4.31918
947926	62.2404	7.95162
948017	10.6118	3.5666
948339	11.7654	1.27967
948481	10.2808	5.78548
950070	16.2775	8.3487
950179	14.3345	-0.0599635
951066	10.1898	2.80894
951239	26.8176	2.89497
951240	48.9601	-0.646326
951241	12.3999	7.84557
951285	14.4465	-0.951329
951589	9.66846	2.80189
951736	6.91909	7.95848
951900	20.4828	3.23543
952438	18.0147	2.40786
952644	7.56384	-0.0432966
952667	10.3697	0.821102
953558	7.94762	2.43796
954068	13.467	3.26058
962230	12.5632	5.56699
963499	12.1095	0.455926
965491	9.13692	2.51569
966135	16.0989	2.18621
966814	46.2378	1.12522
966981	17.2135	4.00689
967245	52.6031	5.29859
967387	9.29715	3.32289
968800	16.5915	3.95021
969531	47.4238	7.99997
971054	14.1541	7.70482
971820	12.1583	4.53163
973109	7.89164	6.49862
973762	9.3441	3.88452
974658	11.6961	1.7417
974690	7.37323	0.855805
976264	16.662	6.21823
977213	10.2208	0.0737903
977536	12.2354	5.90002
979150	11.1982	2.81819
980277	9.47138	1.41433
980893	6.39468	4.38533
981013	6.97447	7.06088
981733	8.29096	6.61
982309	11.0792	6.25706
984045	24.8182	2.36127
984391	8.83011	3.43999
985195	28.1742	2.28314
986209	28.2631	5.69084
988496	12.1002	5.49822
989359	8.41695	4.4266
998657	9.02378	3.92029
1002579	9.9907	8.39409
1005036	11.3569	0.937464
1006460	9.71672	1.67594
1007812	74.4446	7.70672
1008770	26.4088	4.30557
1009364	14.2022	3.54659
1010922	21.5449	6.83161
1011376	15.1092	2.94874
1011612	6.50148	5.79373
1012530	9.30635	3.37845
1014006	9.3455	1.48145
1014880	11.6747	0.851619
1015512	10.6336	4.87759
1015873	21.6388	4.21679
1017588	19.9878	5.42265
1017953	11.0626	3.37871
1018494	12.0615	-0.379116
1018838	12.4484	5.09186
1020343	17.573	7.45017
1022014	22.8746	3.79522
1022081	10.1678	6.20337
1023248	10.562	7.95077
1023692	7.34124	8.11457
1025773	34.333	2.97671
1026269	6.44496	5.36363
1026349	14.0844	3.34107
1028599	6.56653	2.37587
1029296	32.7789	4.79095
1030612	13.7815	4.4832
1033018	29.1873	6.29858
1034799	13.2374	5.1109
1041108	8.38871	4.60329
1041927	35.9521	5.10691
1044086	23.405	4.6943
1044691	9.87694	5.20726
1046004	8.04784	1.74972
1046248	14.9849	2.75433
1046516	16.7656	8.72538
1046702	9.24008	6.66631
1049003	15.2818	2.14876
1049224	7.69626	4.84684
1049706	14.4248	9.06785
1054470	22.1986	6.89216
1056170	12.7857	3.44461
1056366	8.89406	3.96463
1056434	8.71111	3.16975
1057215	9.742	3.27166
1058752	13.2619	5.75281
1060068	54.6283	4.00169
1060977	8.7723	0.0689758
1061134	21.1717	4.28163
1061293	9.30712	6.20692
1062842	9.34698	4.72695
1063222	6.38589	7.98128
1065000	7.99696	5.67596
1068262	6.95465	7.55503
1076816	12.4281	4.51341
1080856	6.77396	5.52736
1082149	9.28873	10.4203
1083128	15.1508	6.80293
1085696	28.3196	4.30293
1086804	23.9213	2.54492
1087653	38.8991	0.526514
1088392	12.6202	0.729017
1090988	20.5418	1.01494
1098499	12.1962	4.96704
1100441	12.9869	6.4387
1100891	10.5911	4.54878
1101458	8.2905	0.542665
1101660	17.5813	8.59811
1102151	44.5065	5.90046
1102522	11.0354	7.14381
1109765	16.1886	2.68637
1111196	7.91763	5.55737
1113418	7.8314	1.42654
1116306	21.8347	5.28274
1117365	9.38667	0.124995
1117643	86.3743	9.49677
1117843	33.0893	5.69776
1117882	9.07451	0.0287702
1117904	8.09989	9.34721
1118206	13.3107	3.22118
1118272	11.4439	3.90066
1118502	13.8072	3.46426
1118938	10.611	2.0647
1119014	13.3125	7.1862
1121637	14.1459	7.20507
1122680	13.3927	0.965587
1123241	7.88214	1.23836
1125399	95.5409	6.78822
1125720	9.44295	5.89123
1126338	12.8327	7.02532
1130863	13.4748	8.10799
1141369	12.7026	6.59505
1143247	11.529	4.96354
1143347	19.7532	-0.546323
1145761	8.56369	5.77786
1149483	12.6992	1.47018
1154223	6.38592	3.47121
1154315	9.64389	5.99293
1155956	20.3964	6.57328
1157529	24.2884	6.00127
1158290	7.96612	4.72569
1158763	8.52217	6.99629
1160502	6.60119	5.42914
1160553	11.8269	3.36949
1164280	22.9912	6.56891
1164777	15.3018	3.83887
1166904	9.32458	5.35042
1167617	8.356	3.58681
1171093	15.4281	2.68644
1173674	6.10232	4.47968
1173791	12.0828	5.36957
1174257	7.41592	2.88046
1177069	19.8824	9.17471
1177465	9.0215	10.4514
1181245	9.45737	6.5293
1187183	8.60414	3.64099
1190212	13.3699	7.93167
1191080	25.9115	8.15632
1191775	10.0386	5.52789
1191854	21.7	5.73839
1193463	9.03278	4.84581
1195637	8.57322	6.98716
1197859	15.2755	3.38313
1198726	6.68874	7.87915
1217927	8.41564	9.57452
1224743	12.4133	-0.701352
1227004	15.4584	4.90603
1231386	7.44013	2.74652
1238281	8.83124	4.02039
1239292	11.1898	0.832911
1242096	11.325	3.62217
1244334	11.1754	6.65132
1244533	20.9019	12.3322
1244904	9.38998	3.84648
1259630	8.13137	1.14634
1260872	16.8499	7.14495
1260881	8.63051	7.25969
1263018	10.3056	1.29739
1263141	10.2496	1.80413
1264288	14.3431	5.72411
1265056	11.3256	5.99895
1265961	13.5326	5.15192
1267421	7.98303	-0.0426754
1267836	5.79366	2.85076
1268172	16.1316	9.1777
1268987	7.71515	4.75399
1276266	9.59706	-3.18885
1276758	8.42107	7.42666
1280834	8.36627	7.4202
1282542	15.9979	5.43798
1285505	19.1933	8.2632
1287954	15.1989	4.29324
1291114	15.2075	-0.461521
1292165	7.63989	5.08091
1295281	9.71867	6.60145
1296317	20.4187	4.69222
1296965	7.70058	4.13001
1298465	12.4689	5.72833
1304440	15.0745	8.13628
1307367	14.2524	7.12325
1308035	33.1785	7.46569
1308260	29.9781	10.3599
1309808	27.1454	5.86242
1310681	9.02398	-1.55789
1310682	15.307	2.23682
1310820	14.889	1.4655
1311254	11.7263	1.73713
1311271	7.56523	2.58962
1313054	7.43868	5.68158
1314718	8.74182	6.53772
1318467	11.4548	4.36585
1319646	7.79583	3.42074
1321897	9.00079	2.30406
1322482	18.6498	6.12342
1322719	9.62568	8.25236
1323478	8.38937	4.1641
1325423	8.74996	0.849992
1326048	10.6805	0.534644
1327083	9.18281	4.78191
1331334	11.609	2.72086
1331555	18.375	8.88495
1331693	56.1572	3.12583
1336219	15.0219	4.8291
1336851	7.18863	6.21553
1338695	16.4056	4.52685
1340391	10.2874	6.75688
1341092	15.5588	5.24322
1347031	7.41424	5.58894
1349092	10.6714	1.27678
1350182	7.36951	4.94436
1353420	8.90398	2.48524
1353851	7.29922	8.38175
1355274	9.24958	1.77264
1356761	14.2101	0.208703
1357742	14.8511	7.46254
1358797	18.5674	3.95936
1364803	8.26148	5.47077
1365329	8.66622	6.0657
1366265	21.3033	7.68064
1366440	9.59922	2.34469
1372626	21.9886	7.88002
1376917	6.1427	4.35071
1380288	14.6612	4.06758
1382728	6.94441	6.15435
1384055	10.0595	8.33882
1392481	21.6868	3.47692
1396381	24.0893	1.73159
1396698	12.4687	6.22862
1398991	38.8743	6.98433
1399481	10.9424	7.8624
1406155	7.20003	5.01679
1409880	14.1073	5.69377
1413530	5.86496	4.50167
1418955	9.54721	7.72593
1420269	23.6442	3.94405
1421326	14.8971	7.90016
1422362	11.9919	7.36117
1431988	17.6545	7.2179
1432753	7.50441	3.61125
1434822	6.67941	1.49131
1435669	9.85971	1.68916
1436703	10.9162	4.67119
1441887	23.7008	-0.792896
1456876	15.9158	7.75026
1458049	8.01945	4.27831
1465336	13.6383	0.958997
1471444	6.8006	0.969313
1472730	7.70115	5.33504
1486651	11.2341	6.04234
1487938	18.6836	3.61704
1499307	7.90429	5.03539
1500483	12.6113	4.97516
1501545	12.6956	2.61709
1506896	14.7187	6.4043
1510522	11.1748	7.51527
1511316	20.7051	5.33681
1517262	15.45	8.15882
1522278	10.5196	3.94721
1542482	11.7272	8.67901
1564929	19.084	6.76441
1567918	7.87845	3.97645
1569678	9.70238	4.42679
1569684	12.8193	10.1261
1581641	11.216	10.2408
1593643	39.2202	-3.56517
1593644	20.3809	-7.59571
1593645	11.1323	5.06923
1593646	192.228	-6.14108
1593647	33.6788	-10.3223
1593649	9.81225	-8.35943
1593650	30.1544	-9.48704
1593651	78.1549	4.44992
1593652	33.6788	-6.37274
1593654	9.81225	4.16504
1593655	25.713	-8.35464
1593656	8.46498	-14.006
1593657	8.33119	5.9527
1593659	10.4898	-15.027
1593660	15.5075	4.67668
1593661	8.29331	-5.16052
1593946	14.5322	0.760309
1602313	12.0821	4.41077
1603544	9.85433	2.76818
1613395	25.7882	10.7577
1617314	9.45587	7.50643
1617349	17.7721	5.25732
1617944	12.1079	4.15439
1623613	16.1231	3.96422
1630861	7.04124	6.32476
1631433	6.93255	4.71115
1631925	14.9252	2.94296
1636260	8.76886	4.67119
1637836	12.6479	5.07923
1637863	10.8978	5.51313
1638103	24.2506	5.05644
1638807	12.5708	5.12595
1641079	19.7278	5.60564
1641994	5.7046	2.53857
1649984	16.6181	6.61561
1652020	13.5024	7.66713
1655403	9.39269	4.31019
1658183	6.78635	-0.726456
1658188	10.4099	6.59066
1660480	17.3871	8.47326
1663414	10.7869	5.36551
1663698	6.91831	1.66531
1664517	6.78584	2.48499
1667956	6.19077	0.598908
1669244	7.02317	8.14775
1670310	12.0313	6.63665
1670439	15.1179	5.14472
1671270	12.7657	4.84508
1671542	6.66287	4.6487
1671912	9.96778	5.26421
1674541	20.349	6.38282
1678325	10.34	4.22618
1687207	9.888	4.59296
1690351	22.3244	7.3772
1690562	9.21642	3.43091
1692389	13.5641	6.13055
1698397	8.67907	5.68693
1699744	8.26787	7.27624
1702228	14.123	7.91564
1702763	8.55976	2.44389
1708340	7.64233	3.10892
1709215	27.4359	6.39247
1713405	16.8465	4.41187
1715291	12.8423	0.00308531
1715606	6.09169	2.43689
1718451	8.1878	5.09202
1718679	11.4481	7.41178
1725973	9.81707	7.84064
1729256	7.67141	3.4332
1732159	19.0497	7.77224
1732745	17.3383	3.82297
1734297	11.6076	5.58757
1754902	10.3417	4.71181
1755363	8.91574	4.49541
1759157	31.0071	8.17249
1761885	8.43546	5.11298
1762671	10.6086	7.75549
1762927	21.0153	6.94915
1762992	7.68232	4.53982
1768298	12.7426	3.81873
1770059	11.1349	3.65448
1777730	9.81248	8.1093
1780360	7.261	3.37901
1781102	6.23139	7.76673
1790738	8.33273	5.89595
1800356	10.6764	5.20645
1802303	22.7523	5.06294
1803065	11.7585	5.07269
1804795	13.205	4.50187
1808813	13.8013	8.43089
1818343	13.7611	5.47998
1820392	10.4369	-1.62168
1822475	11.8049	1.43913
1824633	6.89555	-5.4681
1824640	88.3622	4.40255
1824906	8.41481	1.57364
1829201	11.8635	3.97905
1829625	6.85746	1.88723
1834125	7.57522	6.64339
1834655	7.8768	4.29227
1836832	6.42811	2.50028
1846636	9.05161	3.60813
1846688	5.94419	5.2945
1849917	6.60097	6.0764
1851474	6.90637	1.18819
1852982	14.7165	7.98735
1853019	12.4398	3.03122
1853638	15.9827	4.98254
1854724	8.55563	5.72837
1855045	11.8275	-0.0497714
1855168	14.2414	4.68236
1861476	8.55993	2.55436
1863457	8.21189	3.00542
1865840	11.2371	4.3243
1867730	9.76889	4.01766
1867776	9.52687	4.44781
1869435	12.9299	1.05972
1870490	10.5698	1.94327
1878186	13.7204	5.67735
1878378	22.2777	6.29695
1880905	9.12468	0.239029
1884528	15.0247	7.16351
1885707	22.0196	8.65799
1886404	9.50225	4.6078
1886405	10	1.76168
1887432	10.1132	2.88336
1893469	13.3123	7.43069
1894003	12.5723	7.55441
1897976	9.9615	5.63838
1901065	11.3054	9.10566
1902135	9.85241	4.46378
1903512	15.9429	4.87391
1903857	13.9379	6.23019
1904214	12.4766	10.2366
1912130	19.2541	4.56675
1912635	6.4504	6.14144
1912691	9.43535	1.4578
1914587	8.60249	4.49589
1914932	21.3159	7.70794
1915929	7.7709	5.38079
1919037	17.5941	4.41164
1920088	11.203	4.5034
1923159	23.3282	2.61054
1924629	71.034	7.54067
1930110	8.62419	0.0637111
1930213	9.16295	4.61979
1931936	10.3918	10.5496
1932242	9.31775	7.93581
1934268	7.4467	5.01629
1934670	16.5336	8.0645
1936822	19.5518	4.56212
1939660	16.1467	5.13673
1942240	13.2793	4.04157
1947470	8.56852	-1.72527
1951089	22.1057	4.46061
1951529	6.44753	1.67912
1960013	20.6014	4.56926
1965208	54.4373	4.74911
1967585	10.9122	4.37684
1968847	10.7461	8.01586
1973760	14.2751	6.21728
1975932	11.0058	6.36258
1976612	9.54008	7.71119
1979140	9.56231	4.71853
1981919	14.0691	7.8624
1982409	48.7887	6.98433
1987052	10.1472	8.53802
1987548	10.9199	2.54101
1988222	19.5153	4.35159
1988451	12.9843	3.02552
1991615	9.64212	10.0162
1992685	7.80725	2.37544
1993607	37.6618	6.26697
1997014	23.4275	8.38792
1998135	11.1282	5.27777
2001342	7.95685	4.29489
2001784	8.14121	4.784
2004204	25.577	4.06966
2004209	8.86287	-4.29009
2004214	8.86287	0.230816
2005670	16.9722	5.15282
2006568	10.9463	3.99853
2006621	22.6257	3.59623
2006792	6.27869	0.912287
2016594	6.71024	8.22341
2020975	23.3443	6.99935
2021611	8.5479	2.92186
2026228	9.12919	4.12749
2028142	8.72244	2.41655
2028691	15.5399	6.54136
2029294	7.78252	3.69362
2030172	9.33429	9.61899
2030174	6.84267	-0.0579274
2030243	7.98538	3.97325
2034153	12.8175	5.60868
2035632	11.2413	2.09316
2036477	38.1759	2.65335
2038135	12.2897	-1.44987
2038295	21.9506	8.38974
2042699	7.86213	1.06125
2044428	19.2902	5.30612
2046219	7.39548	0.363212
2046589	10.2932	0.332045
2047281	8.3946	6.11499
2048795	6.31991	3.89966
2049623	9.81101	3.95618
2053812	16.4986	7.13186
2054305	12.8588	3.03032
2059032	12.3544	1.64772
2059273	10.7975	10.5082
2061390	10.7601	7.2206
2070006	13.2228	7.8162
2070496	43.9002	6.92594
2078138	14.161	4.66996
2081862	8.5828	4.87618
2083905	11.5583	5.76345
2085283	9.74078	9.8359
2089619	21.1258	8.30826
2091738	16.3383	6.70362
2094833	12.6407	2.82743
2095658	9.15543	4.32671
2096937	7.23346	-4.76375
2105596	13.7674	7.8624
2106086	39.3841	6.98433
2107389	10.0706	-0.919496
2107716	15.4952	-2.31154
2107965	9.73806	2.98516
2108102	20.5618	6.88138
2108358	9.25007	4.53123
2114773	44.7638	1.31351
2115823	14.5213	1.08561
2118467	16.4459	6.16155
2119731	12.9803	3.45728
2121610	10.6661	-3.23025
2125895	8.94587	5.30741
2128611	6.71909	3.43815
2128636	90.2821	9.35968
2129328	34.8164	8.19926
2129744	11.3398	8.29119
2135238	17.6111	3.07903
2135688	10.9595	4.39224
2135759	7.94124	2.32074
2141289	12.6411	3.18006
2141469	8.03484	-0.668884
2141921	11.0503	5.5867
2141985	9.75236	3.7203
2142339	11.606	5.06656
2144333	11.8792	6.21977
2145987	9.02529	4.22214
2146089	22.9464	10.992
2147544	6.57014	6.10866
2150223	11.7833	3.98449
2152058	15.7834	1.86895
2152383	12.6971	3.7335
2153459	11.0528	3.68846
2157954	10.6477	7.41843
2158242	7.41394	7.93187
2160185	14.6617	10.5068
2161859	8.19912	4.94822
2165843	20.5102	10.5253
2166562	6.73129	4.96862
2168070	9.32665	4.03738
2170600	21.3697	2.47066
2170739	9.42659	6.97576
2172721	9.07853	0.875927
2174833	16.7969	4.29884
2175352	39.2718	3.51991
2177278	8.33081	0.53044
2178706	15.1407	7.8624
2180434	10.0767	5.63694
2181054	9.92459	4.71307
2185653	8.3299	5.78258
2186570	10.234	2.70247
2189000	9.68528	4.04834
2190533	9.25599	7.71596
2190825	14.9271	13.6767
2191181	7.46114	3.54809
2197365	15.8789	-0.0694622
2199159	23.2415	5.68253
2201970	6.70119	1.09021
2203059	19.1208	7.636
2203906	9.86193	6.38124
2205604	15.7238	4.93712
2206141	12.4885	6.68967
2209984	22.9949	11.1214
2211157	6.40183	3.16085
2212536	13.1551	5.83191
2214738	14.2633	3.781
2216277	19.6827	7.13418
2217370	27.1232	6.25232
2219196	19.1662	3.34454
2220220	29.9219	5.47375
2220734	10.2866	4.31263
2220993	8.27629	7.18876
2221936	6.16939	7.26786
2223822	18.296	4.31314
2224509	11.4034	0.668306
2225491	9.1778	5.86403
2226428	7.83232	0.0929849
2228158	26.5179	9.01336
2229911	8.78212	0.16029
2231523	8.19992	2.14695
2231942	12.3717	4.61819
2232427	10.8831	1.32662
2236686	12.0843	5.8505
2236851	15.3476	4.75258
2238715	21.1865	6.39302
2238767	9.40403	3.54147
2238884	10.5444	4.78027
2239710	13.831	3.82824
2240935	11.3099	6.55762
2244023	6.9013	4.76455
2245110	8.29711	2.9652
2245617	7.47392	1.20869
2252124	8.48645	7.48194
2253082	15.7515	5.81194
2253176	9.44758	5.43872
2256032	15.1762	6.42047
2257046	13.7272	4.28075
2258160	7.9024	6.07152
2260867	15.0407	3.19305
2260887	13.2937	3.61675
2261244	8.71195	-0.758952
2264371	8.41507	3.56205
2265803	23.3095	6.96727
2266135	7.36069	1.68221
2266556	15.0337	6.96197
2267050	8.97319	8.48263
2268711	12.3869	6.18869
2269221	29.7372	3.44255
2272062	8.27726	5.86726
2272827	8.00437	7.09476
2274237	11.424	2.09954
2275213	15.36	5.63818
2275579	6.92154	5.93653
2275966	23.3347	6.77604
2276741	14.3631	1.51524
2276827	9.11913	5.69067
2277029	10.0616	3.93253
2278240	10.3972	6.94963
2278805	10.5747	5.79369
2279416	8.04201	5.03633
2280214	10.9204	2.6051
2281378	21.4281	7.27109
2282841	7.71712	6.14682
2284210	30.4472	5.71458
2286536	7.42133	4.43477
2286697	17.0163	6.5208
2288019	8.14378	6.50023
2291279	23.9643	7.64438
2292196	9.21586	-3.60324
2293963	15.0642	7.8624
2294453	45.2406	6.98433
2294994	27.8479	6.68906
2295119	7.24573	8.11065
2295444	15.9261	3.58519
2297108	20.0709	3.84219
2298108	14.1183	4.92457
2299593	8.02241	5.5663
2300484	16.2713	-0.361374
2302457	8.60367	5.4031
2310436	16.2195	4.43236
2311186	9.11778	6.35067
2313350	7.81609	3.88372
2313427	8.52541	6.62299
2315729	11.9502	7.51247
2324695	20.1882	8.10945
2326503	12.2286	3.05424
2329772	8.51975	7.51751
2334728	23.8375	2.45763
2335295	9.10925	4.14355
2336208	10.1153	4.17813
2338228	11.1997	4.28497
2339553	10.9187	3.6011
2341691	16.2601	6.93754
2343457	11.8269	4.83816
2350784	13.5713	4.99885
2351300	11.8926	8.43567
2352383	21.6223	7.41512
2354308	6.05215	1.40739
2354356	6.412	6.31276
2355699	63.7119	3.78978
2359379	12.9071	7.98167
2359528	10.0446	0.875386
2362748	46.4015	6.93738
2362982	9.53876	1.54928
2363276	17.9894	5.89549
2363747	8.73823	3.80769
2364439	9.13671	2.43457
2364492	9.01558	6.06141
2365430	7.92406	0.472141
2366198	18.1308	3.13172
2366377	11.0488	3.93414
2367289	12.7657	5.65178
2367789	9.34641	6.29216
2370465	18.275	5.61294
2370553	8.15363	1.32714
2370554	11.5415	4.23947
2371764	6.89048	6.0729
2371802	11.242	3.8737
2372286	8.64328	0.935542
2373752	8.82889	4.57761
2375705	9.65247	5.4171
2376333	11.1018	3.39949
2377680	16.5593	0.520591
2378093	16.6083	0.125015
2379984	11.7099	5.55907
2381700	6.58926	7.37683
2382005	8.23643	3.8051
2383378	34.0536	1.68255
2383724	17.1607	4.97628
2385580	11.0859	5.87684
2386695	12.6033	8.62297
2391390	9.63937	8.06994
2392944	17.233	4.25981
2393280	15.7865	5.02482
2394900	12.701	4.68606
2395885	21.5603	3.79796
2396432	21.2528	1.5135
2396594	16.7162	2.79442
2396759	21.516	5.12022
2396946	33.3243	10.4823
2397429	9.00741	4.57421
2398047	7.37261	6.45789
2398357	7.84811	-5.53968
2398358	27.2746	-0.334819
2400721	7.34778	6.34843
2401131	23.1088	0.303228
2401223	13.9434	5.63156
2401628	27.6147	7.51417
2403171	35.5649	9.1411
2406437	8.66036	2.10847
2408758	11.6133	6.55883
2411593	8.9625	3.47064
2419286	6.20883	1.76239
2423077	5.28043	-0.196604
2425977	11.5695	7.92597
2428926	9.43874	2.28736
2429860	8.37506	0.243087
2430728	11.1143	1.79231
2431174	11.4301	2.56381
2431567	10.4375	4.09137
2432696	19.6598	5.36325
2433244	11.1468	0.107731
2434418	10.7628	2.40617
2434628	10.1973	0.413548
2438993	13.0047	7.78183
2443370	6.60578	4.2848
2448586	14.2795	6.40942
2453639	10.4525	2.44237
2454129	10.2518	1.78284
2456990	7.46542	6.37509
2457594	11.2358	2.48492
2463626	9.02071	3.56558
2466188	7.47523	4.95602
2466875	9.77807	5.81351
2466997	9.4181	5.81896
2467520	9.90567	6.21934
2467665	8.98246	2.57497
2468617	17.539	5.85683
2469146	18.8066	-0.595873
2472410	11.1677	10.1247
2478329	8.46185	0.928153
2479972	11.945	1.81598
2480372	7.2032	3.24251
2480498	11.9078	7.97347
2481883	8.98639	5.04654
2483786	5.4051	2.73671
2483837	5.68833	0.486361
2493506	14.132	0.302541
2494043	10.757	3.4476
2495869	12.1622	6.37102
2498069	14.5716	2.0396
2501749	13.6487	7.32304
2502641	15.1717	2.09598
2502890	16.5258	2.0385
2503585	11.5592	-1.50061
2503590	12.7397	-10.9581
2506015	21.0691	8.36951
2508713	11.3703	5.45005
2508818	8.7182	5.53535
2512040	9.42278	4.27651
2512684	9.75256	4.20566
2512755	14.4156	4.4614
2513265	11.1734	6.456
2513449	8.46956	0.399176
2514359	13.0596	4.02331
2514781	11.9689	4.2548
2515516	8.93436	6.66917
2520812	22.8632	3.734
2522044	11.9591	6.29572
2523401	8.81664	3.25247
2525509	6.24388	1.85499
2526160	12.5557	-0.900674
2528244	13.589	5.22326
2528322	11.7796	4.85025
2532474	6.73573	1.45893
2533699	12.9281	3.95057
2534929	10.5042	3.34477
2536389	11.0399	7.05468
2536553	29.0181	1.83024
2538163	8.12472	1.76162
2538972	14.7415	0.767142
2541037	20.2085	7.40686
2542286	12.6973	3.43238
2543172	17.5743	6.08268
2544056	17.9444	7.65807
2544214	8.01089	5.00477
2545021	13.549	3.84117
2548636	10.3941	7.21914
2548828	8.79739	4.03811
2553020	9.58753	7.32212
2555667	7.76987	7.78495
2556959	7.89046	6.19831
2561093	7.84986	7.36383
2565710	26.3104	4.94813
2565785	11.3762	9.12042
2566334	8.90035	2.65489
2569335	17.1512	3.93079
2571273	6.79456	2.90147
2571361	8.78773	2.68592
2572597	13.0158	-0.955333
2574216	6.46386	4.44369
2574741	14.1943	7.05063
2576319	32.2225	2.78229
2576840	11.3825	0.991042
2577306	17.8768	6.43097
2577543	13.6857	9.30986
2577945	9.09583	5.94618
2578775	22.8601	1.37355
2579370	5.97491	4.90164
2581664	21.2733	-0.231426
2582368	13.2503	6.05784
2582410	8.38744	2.4152
2585116	9.50635	7.21204
2585805	9.06992	3.08707
2589424	6.90088	6.2431
2589513	10.0696	4.74315
2589762	10.2101	3.03376
2590539	12.307	7.19881
2591512	7.75286	2.70761
2591957	6.01003	7.21911
2593128	40.1195	4.98801
2593299	10.4076	6.08955
2593692	16.23	4.69145
2593974	10.04	9.68429
2594004	12.8378	5.32191
2596203	13.6249	6.87753
2596955	7.79617	5.62146
2599538	9.67535	1.72091
2601296	21.6687	7.96788
2601327	22.6736	3.55746
2601563	7.56887	6.08311
2602224	25.6371	10.7099
2608148	9.81803	8.55869
2609019	12.9124	2.95925
2614705	7.33641	7.72553
2616707	15.9778	7.24621
2617637	8.60946	0.395261
2617667	7.52843	2.62019
2618430	9.7579	6.20215
2618533	12.1291	1.84806
2624177	15.7076	5.16219
2624254	10.9595	6.04362
2625279	19.6766	7.01723
2625535	6.70925	0.177402
2626571	11.4236	4.05654
2627606	15.6646	2.77401
2629900	10.5119	-0.0393872
2630412	19.8446	4.576
2630960	19.0798	7.16201
2631200	8.94054	5.1648
2631223	8.48582	3.19807
2631421	12.4103	6.04001
2631737	20.6881	5.64397
2631928	10.7768	6.27255
2632450	9.08513	8.10404
2633260	28.9797	7.64818
2634734	11.1758	7.22937
2635419	10.7773	-4.18109
2635420	23.1516	4.39175
2635534	18.5753	8.9333
2637049	12.4968	3.61023
2638283	9.9996	5.40189
2642671	21.2924	3.8262
2644219	17.8188	-0.7251
2644225	19.0664	3.94015
2647886	16.9805	2.5823
2648799	16.0039	6.87031
2652293	13.9614	0.828263
2657311	23.4131	4.99389
2658091	8.50031	6.76294
2660544	11.4533	5.05043
2665382	7.91527	1.90281
2672957	10.3964	1.25957
2673125	13.2645	2.5621
2679146	5.40277	2.13659
2680483	7.15504	10.8256
2683876	20.3752	5.68883
2684925	11.6188	6.38132
2685861	11.1242	4.5805
2687807	14.1574	3.65771
2688923	8.5371	6.0316
2691658	9.32608	2.91838
2693606	22.342	0.668291
2693707	38.6895	9.41975
2695167	12.1688	8.33299
2696735	7.32294	1.48223
2697475	16.6256	8.62305
2698572	10.7826	7.01645
2701610	14.7973	1.98557
2703000	5.56427	-0.574678
2708133	14.2117	5.30334
2712952	14.9447	4.08636
2713167	7.85942	5.57118
2713732	11.575	6.06419
2714887	11.681	5.88364
2716720	9.85708	6.45937
2718749	36.5727	9.28131
2718942	11.6026	1.78146
2721598	7.65544	3.07584
2721850	9.16433	1.72315
2721852	31.1797	1.35628
2723164	13.7734	6.45556
2723751	14.0233	4.27752
2724757	28.0632	0.0768112
2725666	15.338	1.57899
2727005	7.40847	5.08718
2729365	12.4563	3.46135
2730003	17.8888	1.54959
2731043	25.683	3.65697
2732003	6.78521	6.95986
2737472	10.9657	1.01891
2740322	9.48872	3.21284
2741721	15.8486	5.32581
2742143	10.1256	3.79359
2742189	14.0589	4.00373
2742376	12.0939	4.05712
2742490	21.3317	5.61533
2742793	13.9484	6.21064
2742913	7.27815	-0.279848
2743051	10.7682	1.70242
2743645	14.4025	0.96036
2743827	12.6786	3.00637
2743832	8.71318	-6.06607
2743837	7.83632	2.80341
2744001	22.9585	9.25765
2747204	10.6409	9.03827
2749855	7.34443	5.10353
2751164	16.8222	1.32064
2753877	8.73871	7.7205
2754726	9.17309	0.934825
2754919	23.5194	5.69102
2755577	9.07673	5.90453
2756023	11.129	6.41442
2760444	9.76911	5.73258
2762951	10.822	3.49563
2768676	5.44143	6.34644
2770215	6.69219	7.94869
2772066	19.6598	5.47993
2772694	21.859	8.96644
2777525	11.6136	2.49839
2778357	8.21942	3.89348
2780107	12.068	5.34619
2785052	10.7769	2.54324
2785544	8.46809	4.18557
2788917	11.3775	6.19369
2790066	7.09849	0.264351
2792073	10.2306	5.23489
2793994	5.87208	2.97875
2796637	7.02022	3.72351
2799817	17.4081	4.46549
2799917	9.47113	1.74209
2800109	9.22941	5.21987
2800744	9.00322	2.89913
2800819	33.5438	10.3942
2801012	12.1294	7.75662
2803586	7.20949	-0.925722
2806098	31.1812	10.8748
2808523	14.3204	5.96181
2810015	11.6185	3.38616
2812085	10.8592	3.50299
2816104	12.2254	2.53014
2816940	11.0511	-1.98614
2817281	11.5663	4.45909
2819859	28.4351	2.04286
2820760	14.19	5.34247
2821765	11.725	6.75435
2821777	29.2863	6.86938
2822061	15.217	1.35008
2829570	9.38748	5.63923
2830923	6.49886	8.76684
2831850	10.6604	8.55139
2835640	8.90599	4.40661
2840871	9.24815	6.61213
2843231	9.51393	5.37676
2852620	7.91265	5.28069
2853509	9.59757	-0.102567
2858029	10.6138	-4.54224
2858235	11.2126	10.9885
2858995	7.44954	4.30163
2860535	9.55476	4.44639
2860816	8.06179	7.46063
2861632	8.13873	2.34962
2862871	11.4937	5.80274
2865324	16.0375	6.75207
2868401	9.91501	1.14805
2869218	11.4005	9.95407
2870046	10.222	3.68788
2870810	13.1658	2.20377
2870955	21.6531	4.96689
2871872	18.088	7.36807
2871919	6.54233	7.55966
2872126	19.4559	7.75517
2875701	18.0798	6.32985
2877714	15.1634	8.30683
2879171	8.21524	3.98139
2880220	10.7085	-2.42663
2881848	20.1657	4.64531
2882421	17.4812	-1.45818
2884696	13.4623	4.79364
2886147	9.88759	5.42383
2886258	14.5338	7.36982
2887865	7.30339	4.95405
2887907	35.1637	7.92107
2889945	16.9598	4.34255
2890433	7.94362	9.54808
2893207	24.5151	4.16564
2896386	9.67343	-0.0393546
2897458	12.5309	1.9358
2897884	13.9697	4.9793
2898155	21.6215	6.9484
2898896	6.47604	4.56145
2900753	22.8128	1.01713
2901188	6.63818	0.564731
2901618	67.373	2.54296
2904026	8.79198	3.80903
2904118	19.5863	0.994114
2907110	11.3923	2.25622
2907244	36.3854	6.59934
2909514	7.17349	0.922013
2913327	19.2946	6.20158
2913527	18.094	5.50675
2914730	14.6078	4.81727
2918265	6.72675	-1.0562
2918290	18.672	5.42983
2918593	20.1682	4.47211
2919743	6.49891	3.5483
2921909	9.55828	5.07926
2922671	11.4569	4.46602
2926021	8.95074	4.10109
2927945	11.1771	6.81039
2928155	12.6501	10.9816
2929251	10.1751	-0.0985516
2929733	9.87489	6.58422
2931282	25.3592	2.68868
2931995	7.32873	2.98802
2932035	15.3748	7.4119
2934845	13.6907	1.45957
2939343	7.18136	4.8348
2939376	19.0776	6.80011
2940499	15.4114	5.87848
2941085	6.12538	8.47361
2941481	8.00066	-0.92573
2946662	7.26592	2.19968
2949201	14.007	3.96686
2949388	8.66307	3.97413
2950897	6.73353	5.30426
2950911	7.94452	-1.05947
2950966	19.8744	8.20523
2952253	30.3844	11.4608
2953315	17.7134	2.10158
2953951	13.4879	5.73443
2957050	21.9799	6.42542
2958497	9.47571	4.01323
2959583	29.1586	9.48858
2964987	16.6621	9.25737
2966250	10.5592	6.18747
2970012	11.1836	6.20664
2970332	10.3542	3.24286
2970850	24.2486	6.25943
2970921	17.4638	1.85599
2970937	7.41866	2.5015
2971730	12.2249	6.1266
2972232	11.1979	5.32177
2974799	26.3334	4.07688
2975189	20.1126	4.13281
2975257	8.15506	3.88042
2975835	9.98892	-1.00925
2976898	13.968	11.2956
2979756	24.9465	2.6615
2979846	11.6281	0.67183
2980594	29.8923	3.67471
3002087	13.1931	4.45257
3003824	19.9945	2.5334
3003886	36.7876	8.88243
3006371	23.1399	2.76468
3008249	8.21367	6.46102
3009663	10.4807	5.85802
3009698	10.8904	2.15962
3009807	9.11744	3.13149
3013132	16.8408	4.17145
3016015	8.04849	1.41128
3019520	6.79371	7.3032
3021015	7.90106	1.53126
3024271	18.8449	8.01838
3027530	7.43472	11.0415
3031186	5.57973	3.79002
3031965	15.0456	8.08408
3032125	7.61166	1.41733
3033043	21.4706	4.99329
3040082	18.0556	8.63999
3042494	14.0947	5.39389
3042740	16.4338	5.91828
3043825	11.1781	3.46998
3044300	10.6628	7.84097
3046082	13.9035	6.30492
3047553	16.0094	6.63317
3047974	18.6105	1.18576
3051086	11.6537	6.69467
3052141	13.447	4.32815
3052758	7.14658	7.33607
3053561	24.129	9.61547
3054032	9.29201	5.26557
3060246	26.8918	6.3431
3060445	22.0616	5.06746
3062545	9.50176	1.16773
3065116	9.86931	4.54114
3067946	7.21994	2.1832
3067973	15.4934	4.137
3068538	24.1167	6.35251
3068973	7.15793	0.651296
3071952	10.6134	7.0112
3073135	15.5126	6.30937
3074365	10.5866	4.74611
3079514	17.0111	7.18418
3079667	14.5289	5.06855
3083169	13.3102	6.73403
3083367	6.5073	7.73293
3083418	8.62731	5.47127
3083569	7.35477	-1.03791
3084346	10.2314	0.215255
3085404	9.83728	1.10166
3086522	14.9352	6.98132
3086717	11.9856	6.56748
3086967	8.06251	-0.590517
3087248	7.98606	5.73541
3088054	9.85058	3.75471
3088641	8.01439	-1.6096
3088778	8.00757	1.82005
3089393	8.28973	3.99845
3089856	19.8429	8.97286
3091337	8.09376	6.8092
3091679	9.93771	1.68296
3094613	13.0943	4.1505
3094996	12.0896	1.90181
3096619	13.2409	3.54322
3097713	8.30856	2.17868
3097856	11.3369	4.70587
3101106	21.7769	5.79914
3104489	16.9328	3.88984
3107063	19.497	9.15338
3110211	14.8808	0.432611
3110670	18.541	5.1517
3111896	12.3506	3.68922
3113860	26.1667	5.28999
3119536	8.63247	7.24417
3121954	7.59765	2.26577
3124967	15.3059	3.78592
3125158	12.348	7.26583
3125855	11.9262	5.66136
3126340	11.4573	7.46966
3130035	31.5938	6.98433
3130525	10.97	7.8624
3132311	9.3394	2.41122
3137655	12.4954	3.42201
3137730	24.1567	7.4558
3137951	13.3308	2.98412
3138819	15.0267	4.03848
3140406	14.2803	5.8012
3140836	8.90759	6.42747
3141123	14.5533	4.39753
3141321	11.0135	5.86484
3142457	14.5079	3.22108
3147814	11.6611	2.37957
3152482	11.356	-1.73104
3154279	16.2589	7.53082
3155584	15.423	4.16721
3156226	22.7199	7.09666
3158949	5.73845	1.45741
3159621	14.8992	4.30438
3161757	14.7777	2.01212
3162956	6.43517	2.8024
3164956	9.65752	5.8132
3165730	5.07107	3.7126
3166279	10.5464	1.8987
3168255	11.7423	7.43444
3172524	9.07389	2.01125
3173949	6.11332	7.55449
3174216	7.47947	2.62491
3181071	11.8455	5.85437
3182452	34.6602	5.99878
3183694	12.6643	4.96621
3191710	8.93369	1.81813
3192733	23.0887	2.99628
3193352	50.49	8.85552
3195118	7.9497	5.29797
3197937	7.34203	5.21572
3198414	6.34615	4.76448
3202103	15.2272	5.84843
3204831	7.5626	3.88148
3206830	15.9178	10.8489
3207326	8.95145	-3.17753
3207767	10.4564	3.49325
3211916	8.82408	5.0117
3212230	6.04307	2.55579
3212555	9.97677	5.65858
3213070	8.2758	9.09829
3216027	32.5379	6.82791
3216145	11.5905	4.73857
3216188	6.13235	5.73261
3220104	11.6272	6.34594
3220329	9.21763	6.62464
3220830	10.5249	4.43175
3221555	11.2983	4.38175
3221795	9.90072	6.19959
3222497	19.2016	3.89616
3223949	6.48927	2.32418
3224231	18.7675	6.47324
3226706	12.2893	8.73529
3228250	12.2627	9.30455
3229993	6.28824	1.54654
3232836	10.1601	8.25868
3233175	31.7427	6.465
3242161	12.4985	3.7259
3249403	13.9498	5.96298
3249657	11.8419	4.83648
3251061	14.5487	7.79009
3251967	22.365	4.92119
3254628	9.95917	-0.518647
3254858	8.47193	5.8884
3254874	12.5326	4.891
3256649	10.4688	-3.3491
3256651	8.35843	6.37338
3256929	13.6198	2.75816
3258961	10.8272	7.1661
3259743	7.09283	4.5053
3262857	9.05135	7.8624
3264483	7.77827	4.05189
3271880	17.6049	4.05132
3271906	9.72897	6.69532
3275271	19.9323	5.20758
3276920	9.6827	5.20164
3278164	13.8619	4.16237
3278352	7.37382	4.85784
3280279	13.5325	5.13302
3281513	23.6525	5.62267
3281634	11.3691	5.08037
3282721	20.287	0.484716
3284398	6.96924	8.04643
3286405	13.643	7.23016
3287030	6.46955	1.01136
3287482	6.68084	4.46155
3287830	9.25913	2.15865
3289126	24.7468	4.15069
3289811	6.74192	4.93898
3289870	11.4429	5.22989
3291591	11.576	-2.45937
3292292	11.8481	-0.144289
3293687	8.33042	4.47657
3294110	11.5784	5.76406
3295391	9.9903	4.66017
3295421	24.3815	5.84592
3297103	6.2383	5.76908
3299474	8.59727	5.16859
3301473	6.73174	7.69239
3308342	8.92031	8.30663
3308687	14.4175	3.76007
3308791	7.84731	5.15211
3310591	21.8129	7.16441
3311340	10.333	4.30444
3312537	18.7691	8.15398
3313333	8.65569	4.11905
3314098	9.405	0.814123
3317754	17.6905	3.30441
3318983	24.523	8.7903
3321603	10.7469	3.7245
3321655	20.7202	1.3612
3327492	12.9855	5.83934
3328143	9.75063	1.92684
3328802	9.10289	4.81873
3329577	21.4354	6.95049
3330893	39.8778	4.40709
3333307	22.8172	7.04945
3336445	12.4506	8.11337
3337446	7.34285	2.62041
3338346	46.5221	8.43188
3338942	20.2735	7.38497
3339273	6.6417	5.72519
3340705	8.87933	4.83962
3343624	6.07591	7.86294
3343978	7.96818	1.14601
3347538	40.7263	5.77416
3349043	10.4383	4.22932
3352187	27.4351	6.37068
3353446	12.0393	2.29273
3354709	9.36033	4.23021
3354987	52.7883	10.4854
3355914	11.6138	6.88287
3355955	16.4979	8.03581
3356451	24.8378	6.01234
3359861	27.635	8.62283
3360153	11.2063	6.38457
3364262	8.58247	2.37918
3364642	18.018	1.08523
3366205	7.44666	6.89473
3366353	16.3275	5.73517
3367121	8.22052	7.8624
3367611	36.4565	6.98433
3371321	29.9602	5.44264
3371815	10.7544	6.65941
3372210	21.6856	6.32537
3373691	25.4085	4.69224
3374692	11.8025	1.75535
3374766	11.023	8.82599
3374920	16.3974	5.58024
3375055	26.9448	0.578202
3375147	12.9632	7.25062
3376144	5.52845	3.32906
3376471	19.6748	4.72476
3377614	11.628	6.09945
3377629	12.2361	7.11361
3379662	9.66349	4.80597
3385199	15.3817	5.02236
3387230	14.3245	3.21482
3387680	22.1675	6.30126
3387682	13.4989	3.97709
3387708	17.004	-1.32316
3389953	12.0482	7.71168
3390067	14.5293	10.0693
3392800	8.2614	4.2422
3393070	12.4255	3.1101
3393344	10.4698	4.61849
3393734	12.5528	7.79938
3395282	13.0812	3.78433
3396506	8.99406	5.42254
3397869	9.7715	4.83495
3398037	8.46537	4.76477
3398084	6.27553	3.61853
3398992	7.19511	4.36009
3399055	28.1458	7.17277
3401944	10.9	4.73258
3402605	11.7299	5.08273
3404443	8.81813	5.41948
3407581	10.5363	-3.97007
3409021	6.65851	0.745496
3409023	17.4674	8.66697
3409443	30.6135	11.2049
3409620	9.65644	6.05553
3411763	13.56	6.56399
3412426	7.1922	2.01533
3412692	35.5215	9.49943
3415058	14.0247	3.87033
3416755	19.1846	5.29384
3416869	9.29914	5.69048
3417061	6.55012	6.53664
3417350	14.1723	0.687668
3417758	11.3288	2.45811
3417883	28.5964	7.16363
3418792	15.2563	7.01865
3419077	5.94026	4.16189
3422204	15.9076	9.33626
3422817	32.6984	1.11334
3422831	68.6056	7.58562
3423544	51.7789	6.78929
3423598	11.1121	6.29089
3423687	45.7111	7.12201
3423832	28.7152	4.03725
3424132	33.5396	0.406054
3424213	11.9376	2.08938
3424333	18.0027	4.96015
3428086	12.5395	4.09453
3428724	13.0123	1.54959
3429078	6.50076	7.12009
3429764	13.4916	3.01778
3430671	20.6591	8.12144
3432255	7.90987	4.66045
3432962	7.11809	3.98945
3433135	6.47532	-4.14274
3433640	6.74441	2.30836
3433727	6.9612	3.39877
3435138	8.49882	3.40025
3435823	11.6051	7.11787
3437933	9.35855	5.80849
3439546	6.36626	1.35985
3442266	9.42315	5.32703
3442476	5.46667	3.97641
3444816	7.08454	4.21743
3445355	30.9306	9.05135
3446741	6.23129	2.63959
3448774	11.3485	7.92992
3449041	6.99428	3.66422
3450195	31.1815	-2.44576
3450256	7.00923	4.81519
3450518	10.941	6.33628
3451739	13.5976	5.60742
3456431	43.3174	9.21971
3457545	9.54185	3.26005
3458098	27.2607	2.93648
3459429	13.0471	1.25555
3460219	16.0248	5.82041
3460715	12.3309	3.55669
3464001	6.72606	1.75335
3464150	10.2818	4.96872
3464369	20.3608	4.85769
3464534	7.28534	6.57366
3464625	16.5177	7.42402
3465104	13.4763	0.752551
3465399	14.1438	-0.581802
3465557	14.3358	1.86469
3465575	16.5806	0.0305754
3465860	6.88015	3.60509
3468277	6.73411	5.79796
3470212	13.135	1.54959
3471252	25.2238	3.65697
3473584	7.86029	10.2186
3478137	8.83737	1.73845
3478184	8.02989	6.36943
3478190	18.8179	5.43367
3482046	13.2123	5.19704
3482718	12.5778	5.31191
3483534	12.2964	6.63193
3484055	7.72913	2.12615
3485012	7.89248	6.46184
3485925	12.6559	4.79516
3488668	9.69106	6.20524
3490037	13.1228	4.93825
3491285	10.836	5.1556
3503169	14.1632	6.52941
3503209	12.7246	5.12525
3503878	12.3241	4.35259
3503974	7.66522	2.32851
3506360	14.4649	5.55415
3506993	8.88191	1.60478
3509679	11.4263	3.68247
3510333	8.71847	7.35193
3511965	7.29994	-1.74404
3514114	9.42124	5.93679
3514754	11.089	7.13697
3518106	10.3411	4.53465
3520293	10.3263	3.97912
3522976	16.3061	8.70802
3523865	8.29452	1.82826
3524194	11.7925	4.47179
3524644	12.1201	4.11951
3528514	13.6432	1.41206
3528878	8.23813	3.62197
3529442	5.74631	0.75079
3531693	29.3201	0.908387
3531695	18.8407	4.59431
[truncated: 1,128 more rows]

## Sheet: E.coli_wt_TCSs
TCS coordinate, bp	N3E	Sequence score
1905	11.5035	6.67069
4861	7.53554	7.27055
15380	5.79439	6.62711
18851	9.5939	3.97498
20731	11.7408	5.41693
29027	12.8853	7.62059
57398	11.0028	6.34453
110969	8.88707	3.03764
118462	13.1262	7.4184
230265	11.4651	2.99311
231655	7.44826	3.04217
233688	7.51483	1.84795
235632	17.406	8.8452
236068	15.5759	4.6528
242111	17.2131	6.18804
242715	8.9755	5.49411
383129	8.41898	5.28587
433843	8.98972	6.8278
437089	10.5671	3.10245
437258	11.3207	3.18978
659140	6.84263	5.68611
668723	7.95802	7.00632
690473	11.9498	6.98433
709716	11.7609	2.39546
774680	15.3621	9.51413
774686	13.6465	6.52969
777139	43.0028	10.3817
781363	13.717	6.92122
784015	13.6296	8.65667
791607	8.4637	3.39786
826002	13.4545	4.65181
834386	8.03254	5.43352
838638	10.4229	9.60055
846548	8.12493	5.31191
926777	13.3239	5.67543
936890	14.739	1.80198
938709	12.6942	7.54558
941064	8.11935	5.6637
942289	7.21258	2.93818
942644	11.7469	-0.857444
945814	10.9451	4.36591
946424	8.61442	6.85197
947926	13.2446	7.95162
948017	12.1047	3.5666
948582	14.9115	1.40857
951240	18.2223	-0.646326
951900	11.775	3.23543
969531	8.3893	7.99997
1007812	11.9341	7.70672
1018801	7.66294	6.21581
1020343	7.59822	7.45017
1117643	13.2445	9.49677
1117843	8.16982	5.69776
1125399	26.1182	6.78822
1155956	8.84735	6.57328
1164280	14.5015	6.56891
1164777	12.5158	3.83887
1177069	10.0539	9.17471
1179645	8.44501	-8.06362
1179646	8.87973	4.56391
1244533	10.0533	12.3322
1296317	6.19538	4.69222
1308035	20.0373	7.46569
1308260	11.1242	10.3599
1309808	7.79907	5.86242
1593642	8.02843	3.85564
1593643	14.0917	-3.56517
1593644	9.5376	-7.59571
1593645	7.16141	5.06923
1593646	48.3608	-6.14108
1593647	11.7192	-10.3223
1593650	11.3804	-9.48704
1593651	26.2729	4.44992
1593652	12.3721	-6.37274
1593656	11.7247	-14.006
1824640	15.0978	4.40255
1914932	5.77065	7.70794
1923159	8.23218	2.61054
1924629	15.8986	7.54067
1965208	10.2275	4.74911
2070496	10.1554	6.92594
2106086	18.779	6.98433
2128636	12.5879	9.35968
2281378	11.5566	7.27109
2294453	17.4796	6.98433
2355699	15.7913	3.78978
2362748	14.2939	6.93738
2375705	7.76032	5.4171
2383378	15.965	1.68255
2389504	9.48707	0.485542
2395885	13.0277	3.79796
2396432	12.832	1.5135
2396594	12.2504	2.79442
2396759	19.5959	5.12022
2396946	14.0648	10.4823
2397918	10.5493	9.04046
2398358	14.0192	-0.334819
2400832	7.41067	7.19259
2401131	12.8841	0.303228
2401223	13.7365	5.63156
2401628	19.8942	7.51417
2403171	25.1052	9.1411
2406017	6.50884	2.83007
2423650	8.52434	4.3847
2536553	10.482	1.83024
2602224	8.84763	10.7099
2633260	7.34501	7.64818
2693606	7.69931	0.668291
2693707	7.98269	9.41975
2718749	16.1976	9.28131
2721852	11.4958	1.35628
2722650	8.334	3.47579
2724285	8.50889	7.36271
2731043	11.4551	3.65697
2744001	5.95476	9.25765
2754919	9.47619	5.69102
2799817	12.325	4.46549
2800819	20.0346	10.3942
2806098	14.5393	10.8748
2817281	9.91969	4.45909
2818705	7.85926	3.50846
2819859	33.8618	2.04286
2821765	10.2202	6.75435
2821777	24.5289	6.86938
2822152	5.15124	6.15363
2875701	7.03473	6.32985
2900753	9.89372	1.01713
2901618	15.3004	2.54296
2931282	24.1882	2.68868
2939376	10.328	6.80011
2975189	5.25159	4.13281
3003886	9.07702	8.88243
3068538	10.357	6.35251
3094613	9.13536	4.1505
3130035	9.82898	6.98433
3140836	9.22443	6.42747
3154279	15.1884	7.53082
3154450	10.4757	5.89806
3155055	7.78584	6.2418
3155584	8.6601	4.16721
3156226	18.525	7.09666
3159621	7.33217	4.30438
3289126	8.94122	4.15069
3295421	7.69944	5.84592
3308687	11.4381	3.76007
3312537	10.7935	8.15398
3317754	11.9969	3.30441
3318983	9.45116	8.7903
3338346	15.2545	8.43188
3354987	15.7629	10.4854
3359861	6.53458	8.62283
3366205	7.37135	6.89473
3366353	7.37879	5.73517
3367611	11.2997	6.98433
3371321	9.49038	5.44264
3373691	12.9902	4.69224
3412692	8.69126	9.49943
3417883	14.8694	7.16363
3422831	17.3325	7.58562
3423544	59.7023	6.78929
3429764	13.5571	3.01778
3445355	18.033	9.05135
3449766	7.35198	0.884829
3450195	13.7939	-2.44576
3450518	9.52071	6.33628
3456431	21.9001	9.21971
3458098	18.3561	2.93648
3459394	6.83427	3.8514
3459429	16.004	1.25555
3460715	12.4874	3.55669
3462572	14.1873	1.98443
3462985	16.8514	3.23909
3463526	35.9809	5.75957
3464001	20.1452	1.75335
3464369	23.5492	4.85769
3464625	13.2253	7.42402
3465104	9.81532	0.752551
3465399	9.00016	-0.581802
3471252	8.41058	3.65697
3524644	12.2419	4.11951
3559591	13.8285	8.78463
3560225	11.0705	2.84085
3581771	11.4422	9.34581
3584015	11.9714	6.58603
3585248	7.04549	7.74646
3588206	21.2619	4.43685
3589635	8.6952	1.29694
3591134	12.9009	-0.457539
3591553	11.4349	7.72855
3592152	17.1105	3.06411
3595054	12.1539	3.72631
3595121	17.0791	0.911111
3595772	11.9991	6.08153
3596175	26.7929	8.7243
3596358	9.15084	7.52858
3612430	5.73941	4.81949
3618873	18.2028	6.93012
3658017	11.6384	7.23379
3680064	14.253	1.91052
3681440	12.9081	8.71592
3681512	16.3504	6.14742
3685368	9.64365	2.76165
3685491	22.8209	3.80623
3685695	11.4534	-1.94256
3688709	8.26208	4.03571
3688895	8.01329	3.90894
3689065	10.9022	2.92604
3689969	8.02045	5.15705
3690062	11.0598	3.26173
3690183	23.1561	8.0483
3690249	21.6613	4.75462
3690348	25.1106	2.29002
3696103	12.549	3.4803
3720934	18.6652	7.55539
3721101	9.2884	5.41063
3722060	8.55787	5.25359
3722204	8.57571	5.00843
3722310	9.21373	3.11569
3722336	17.0496	2.38518
3722628	9.21707	4.87713
3722686	10.079	5.3263
3722767	16.0956	9.40295
3723625	11.8852	6.6825
3724422	18.5922	8.91509
3730833	21.4429	2.83704
3731237	35.4452	4.93441
3733110	10.7637	6.07462
3734238	10.3609	2.74727
3735066	13.9294	1.31006
3741468	12.1871	6.80464
3743112	5.9663	4.56835
3743325	10.1744	6.18495
3745672	15.5197	6.00826
3746675	9.0543	8.0037
3750807	13.0843	8.25404
3751184	70.7046	5.75149
3751497	13.768	5.87905
3753707	8.67638	4.18478
3753937	10.2749	7.41331
3754224	16.9764	-0.291589
3754577	8.89708	0.355064
3826382	13.0957	4.85473
3854311	18.4063	10.2363
3854590	9.15812	6.99601
3864453	8.97477	1.53416
3864706	18.4171	6.62965
3923974	15.9172	6.96266
3988418	12.8223	6.98433
4014972	11.7257	6.99598
4023347	11.101	2.91869
4023410	20.4221	3.54538
4023428	7.47644	6.46945
4025359	14.0619	3.76451
4025591	12.252	8.47632
4025921	22.4947	5.68056
4040966	8.36662	5.12986
4047578	7.13657	5.59145
4053075	14.0005	7.96042
4064310	7.64254	7.40886
4068952	8.79096	11.5557
4071453	7.27897	8.63338
4071893	8.37249	7.55889
4077718	17.437	2.08347
4085809	6.11093	5.96644
4090890	10.9268	9.25073
4140658	8.4889	4.28468
4146918	11.0038	7.15151
4171348	7.80715	4.30385
4173408	11.0563	0.899874
4175196	11.2469	5.92469
4191920	7.65065	6.32493
4197650	7.8977	4.0906
4197682	10.0394	6.50086
4198727	7.09781	0.37588
4199267	19.0434	4.75231
4199290	22.6349	3.23065
4199499	25.9583	4.68924
4202758	10.4302	5.30151
4204315	12.6108	0.117294
4204869	17.6463	8.22142
4208430	6.99339	2.90995
4209157	11.6267	8.48793
4209845	17.5692	8.09353
4210393	6.67878	0.875789
4212663	16.1479	3.83516
4219690	14.5943	8.14049
4220336	7.95915	4.71186
4220338	8.07135	3.91537
4220987	7.92675	2.30714
4221116	10.5384	6.81894
4224874	18.8933	3.03365
4225456	16.9547	4.37518
4235439	9.69169	6.41829
4237405	15.7814	6.52037
4245401	20.7541	4.04238
4246661	12.0266	3.94457
4260739	7.56745	2.86661
4264231	7.92974	9.97396
4266455	6.06906	1.29038
4269475	6.44406	8.73515
4269909	6.62103	6.78403
4319173	17.4719	7.41545
4351749	12.5689	7.65043
4359011	20.554	7.4674
4362470	7.62171	5.78965
4365623	15.1388	0.138197
4369218	8.82666	5.37507
4369831	48.4587	12.1517
4379294	11.0833	5.77058
4379828	12.0727	10.5482
4379843	14.862	4.22944
4379849	6.74688	5.78724
4380040	13.2242	2.36279
4380471	6.47586	0.762803
4383512	12.1161	4.84939
4383518	10.8352	3.8404
4385069	15.8559	9.97434
4385647	6.37747	5.56332
4413579	12.162	9.61674
4414754	32.3837	3.26462
4422923	19.4916	5.50365
4437576	7.15537	-2.67076
4442994	19.4108	6.85259
4455448	5.96654	5.834
4455980	6.65037	-0.432116
4460092	11.3753	4.38267
4460249	11.2194	1.60639
4460826	16.8944	6.5411
4461081	11.1174	7.358
4461347	22.4681	2.13381
4461588	11.8483	3.3553
4462927	14.4549	3.00608
4463381	11.5915	5.35695
4463435	11.0119	6.38033
4463885	10.837	5.36826
4464690	23.6343	5.78774
4465125	15.4794	4.50887
4465205	21.0599	4.03263
4465235	7.13861	2.87863
4465434	14.6978	2.69546
4465599	7.29107	-3.40854
4466517	10.0913	5.54966
4466675	8.26609	-4.04459
4466946	12.8757	4.70891
4467255	6.96668	4.0033
4467450	7.13106	4.19908
4480547	8.38948	9.61836
4577075	7.28746	6.65576
4582323	9.33677	4.98772
4586000	10.6292	5.71375
4594718	9.32833	8.13618
4612240	14.9483	4.57472
4625853	7.96583	9.18617
4629334	10.8217	6.75467
4630296	10.2433	5.75753
4636186	15.8811	8.16645

## Sheet: E.coli_gyrA-S83L_TCSs
TCS coordinate, bp	N3E	Sequence score
1553	10.1808	3.97702
1905	28.4408	6.67069
2303	18.8894	6.08381
3654	20.7365	5.89528
4861	10.071	7.27055
5488	9.2602	8.46805
5506	7.41185	7.41806
6306	11.9152	7.66228
11193	9.88228	6.91377
11269	15.4541	4.78644
11408	23.485	7.8612
14374	10.9642	8.73161
14826	8.70429	3.53273
15380	22.7227	6.62711
16590	7.55328	6.29572
17316	11.9801	1.53757
17328	10.9116	2.67916
18849	20.8918	5.06589
18850	6.25041	-1.58857
18851	30.1692	3.97498
19077	10.2213	0.81486
20731	32.7133	5.41693
22556	16.7003	-6.14122
24114	14.0743	7.71144
24865	29.2309	8.05751
25448	10.8725	5.86366
26767	19.9889	6.1464
27075	9.11425	-1.32624
28523	10.8993	4.88628
28903	8.97302	2.40865
28958	8.75679	9.35495
29027	31.8897	7.62059
30567	20.0623	5.83775
30703	13.2353	4.80354
37999	12.1441	6.91089
40276	9.27341	-2.23412
42627	10.0838	3.02133
44092	17.1977	7.45797
44218	5.50675	5.77353
44247	16.2088	4.87244
45522	7.83423	9.65144
47398	16.8551	5.62052
50612	6.96673	5.12214
50864	11.4787	6.09256
51314	11.9623	5.23853
52405	16.1078	7.20173
53440	16.7924	0.305311
54026	10.3644	6.12479
56205	7.90764	5.51507
57398	27.3928	6.34453
59418	15.2751	8.24576
61631	11.2114	5.11916
61860	9.97332	3.69479
61899	6.32319	3.86804
62036	13.3439	2.76119
62469	7.47403	-2.25605
62694	12.408	6.88151
74266	8.84138	5.91003
76549	14.806	8.03945
87593	11.719	6.77979
88585	7.74937	6.00531
90198	10.3493	8.66376
90980	12.1906	2.50076
91663	8.5503	5.52378
94001	18.9502	3.67366
96120	12.0392	7.34199
97128	18.3155	6.31615
98010	15.8226	5.67099
101571	11.6996	6.12529
102264	8.86662	6.31905
103924	15.1947	3.0233
107068	11.7677	0.842969
108554	13.512	4.58706
110488	15.7023	6.54958
110969	12.1909	3.03764
112061	12.1372	6.18329
113028	9.59535	-0.55691
115324	6.96507	5.53063
115908	9.04237	1.73154
116006	5.49496	5.34101
118316	11.4307	2.44942
118462	31.825	7.4184
121047	11.3441	8.03295
126672	19.1602	5.33835
129766	23.3839	5.91073
133789	8.68922	5.95691
138219	21.3745	4.79986
143913	8.97591	5.02407
144141	10.669	7.68704
145248	13.6306	3.669
145250	10.7991	6.59039
146913	15.9378	-1.40715
153097	9.26766	5.97559
154482	15.4414	0.920209
155317	18.6514	4.87708
157457	15.9029	1.52545
159030	17.9384	4.58202
159303	8.18951	1.92058
160219	15.5082	6.08783
160489	6.4746	8.91495
161414	45.0299	6.71034
162424	11.496	5.03289
165573	11.4082	1.5938
166334	10.517	3.30194
168361	6.20436	4.59558
171551	10.2178	0.91563
174006	6.74149	2.98838
174686	7.55262	4.93435
177228	9.78693	6.87406
179232	12.547	4.13808
179536	6.9555	8.06796
187510	8.38124	7.02344
188071	8.25907	5.17928
189805	7.13872	4.74346
190280	9.54728	5.89315
190895	19.2065	7.98455
191303	12.4083	6.59291
196683	8.55376	6.22606
197508	7.40657	2.86565
200745	48.0246	4.34206
200790	27.6806	9.13612
201254	12.4621	7.80546
202535	7.84384	4.19112
202712	13.3995	9.23517
205155	8.64438	5.26129
206472	9.57151	3.42852
208142	9.07284	4.46059
211525	11.2105	5.80792
212726	28.8591	8.7139
212989	8.66727	-0.374622
213160	8.99987	4.06034
214293	27.1823	1.01041
218816	16.992	1.58461
219125	8.92564	2.38497
220066	12.0794	4.65202
222612	7.42196	6.48002
222840	24.3124	7.94078
223658	16.3355	3.83516
224698	16.7999	1.54959
225336	14.1204	2.3808
229408	9.17759	3.90922
229502	7.93838	1.07299
229561	24.2164	3.74026
229794	14.9547	0.372626
229982	21.6241	5.59222
230038	6.22282	5.11303
230265	21.0995	2.99311
231174	8.47403	5.36462
231655	14.0875	3.04217
233688	31.3011	1.84795
235632	12.4407	8.8452
236068	62.3613	4.6528
236353	20.3834	4.18078
237959	12.7603	2.45471
242111	64.5869	6.18804
242715	28.5718	5.49411
243964	21.4428	6.4964
244299	8.85938	1.76521
244551	20.2866	3.71323
244641	15.8007	3.28248
246052	8.89505	7.14163
246713	16.4861	6.39841
250137	25.2098	3.37423
250281	9.49717	1.87671
250317	7.52602	5.99196
252183	7.9025	2.28964
252195	6.6267	-0.0799633
254585	13.0805	5.95002
255017	5.9563	7.49368
258118	7.3585	2.74112
259312	14.337	5.68476
261145	9.17582	3.40012
261475	8.60185	0.96271
262297	10.5576	2.61983
265037	7.53814	3.08634
266065	10.0137	4.35879
268648	10.0008	-0.665604
269187	17.5672	5.16877
271329	18.4675	6.00261
271707	8.48651	6.02792
273767	13.1541	7.8624
274257	27.9579	6.98433
372320	8.80723	3.61066
372387	7.92447	4.37584
376312	23.9359	9.07746
381111	5.45986	0.969313
383129	15.7738	5.28587
386202	6.82555	4.32336
388545	8.22756	4.42399
394488	11.4399	8.40334
395152	19.6585	4.52869
395662	10.4874	3.49589
402693	14.3552	3.63086
404537	11.5101	5.18852
405343	8.31268	4.6434
406668	7.959	5.23103
408679	9.38169	4.01778
409091	10.7475	1.37141
410262	8.95791	2.45513
412273	8.03019	3.97566
413611	12.102	7.34477
415476	10.7884	5.8128
419328	12.1713	2.63733
422913	6.93276	2.92094
426939	13.0023	7.6987
427286	11.3927	6.18289
427454	13.7037	6.09946
428537	10.3507	6.75889
429408	12.8917	7.27155
429948	18.5499	8.71519
431648	6.1705	2.91528
433780	11.2621	4.11287
433843	18.7233	6.8278
434173	15.2287	6.06389
435628	8.1052	6.39755
436223	7.48366	5.54525
436806	11.1695	4.81371
436827	13.7686	2.58994
436935	12.3271	4.77525
437089	33.5917	3.10245
437258	22.4274	3.18978
438051	9.91339	4.50859
443436	8.97275	8.16613
444599	8.46362	4.04931
445134	11.8291	3.94739
446986	31.13	-0.0741336
447850	16.5311	3.3903
449612	8.86151	5.37023
449961	7.66365	5.3385
449973	13.8191	6.2589
452040	15.8742	5.84377
454383	9.526	4.86521
456148	13.5343	9.9672
456217	13.6444	7.42047
456382	8.52099	-0.319971
457047	8.62967	6.28409
458791	12.947	5.07782
460286	19.4468	9.2972
463280	11.7665	4.5261
463370	7.98401	8.36795
470448	14.2716	-1.16478
474324	15.9848	7.06078
476740	15.7418	5.48575
478096	19.294	7.34302
478290	11.5574	-1.36735
481038	18.0055	7.26785
481968	9.77965	7.12357
483967	11.8214	8.57428
485903	9.65683	5.8482
488785	12.295	5.06819
489734	13.3502	3.84223
491567	8.15669	4.95083
492754	10.7003	6.69974
493763	13.2717	7.52188
494248	9.05337	3.91981
495891	14.1588	5.90884
496776	12.883	8.37634
497050	6.12267	0.755367
497533	8.82883	2.68011
497577	6.82136	3.51824
498275	16.4815	6.23905
499012	11.7084	-0.162834
500322	7.26594	3.92997
504299	10.4578	6.97143
505319	25.7892	3.83273
505907	20.8768	6.36205
512110	12.7705	7.27885
512180	9.74097	0.574885
514421	13.2324	5.18153
517605	13.4628	8.25596
517650	16.1954	9.00708
518069	6.69205	2.87332
518130	10.1361	4.03019
530423	10.7547	0.409584
532800	19.7757	4.99158
533387	11.3126	4.29553
535212	11.0965	6.52819
539561	42.0807	7.73
545241	13.6386	7.34101
549593	7.89172	2.63221
550317	9.04085	3.13228
557029	24.9633	4.12714
564123	11.6953	3.668
564150	43.009	5.73632
574402	11.9483	7.8624
574892	31.8794	6.98433
580448	9.723	5.12595
581158	11.8544	1.44364
581354	10.2679	5.57724
586095	26.9863	6.73028
591408	10.7346	6.00875
597076	11.8348	7.59046
600271	6.47395	0.423762
605731	5.65258	-7.42534
605732	18.4758	7.45699
606310	6.14731	2.68025
625682	16.7094	1.55799
626662	13.3918	5.31694
634491	11.4603	2.05549
637387	17.0952	3.64731
639524	6.72849	1.74037
642971	18.914	8.91367
654814	17.0398	7.8624
659140	35.6878	5.68611
660218	11.2063	-1.588
660706	5.97165	5.43394
661228	9.46826	2.53929
661699	10.4483	1.65102
661769	15.8234	4.36018
662012	28.5588	4.78449
665296	17.3787	5.93675
665462	9.67019	5.74459
666514	23.851	5.73087
667182	29.1056	5.02467
668723	15.0852	7.00632
670466	18.5017	5.55309
673282	7.33678	4.76263
673487	11.452	3.68626
674968	11.2536	10.3708
680541	7.70333	7.2624
681371	18.2882	3.51834
683446	7.48477	3.35556
683773	10.8199	5.88813
685232	9.37866	-0.258134
686059	30.2649	2.2973
686336	11.0538	-0.998251
687407	9.89369	9.30435
687765	22.8968	0.909027
687766	17.461	3.83489
688751	10.8631	4.82578
688883	17.8532	9.03005
689983	12.2302	7.8624
690473	40.74	6.98433
693681	9.66394	4.87202
697196	18.9249	3.68049
701870	39.1024	5.20076
702372	6.37699	7.1728
702477	7.15432	6.95215
703785	7.33637	4.63946
706170	10.8373	11.9096
707794	8.93747	4.18207
709138	7.2125	-0.846524
709716	47.4261	2.39546
710190	41.6865	0.98308
711236	10.2741	01,05,5948
711757	23.965	7.69311
711763	13.9409	9.3416
713217	9.13753	4.3792
713442	13.7385	5.06706
713760	10.9195	8.41521
714970	12.8045	3.6725
716381	39.9588	11.2268
718666	7.25298	2.73958
719636	12.2251	5.94246
721129	6.53109	-0.488137
721544	12.1277	5.73259
728492	9.00202	3.37341
740370	7.70467	6.58751
741593	9.27718	1.7335
746162	7.56887	-0.401538
746406	13.5403	0.343782
753137	10.8733	3.81422
756824	6.56681	7.41936
757279	8.92204	7.28638
758372	7.67185	2.58504
759064	17.1116	6.51187
761023	18.865	6.37473
764928	15.6696	5.13372
765102	14.1729	9.212
766645	5.76773	-1.82126
767029	11.9271	3.72025
770912	16.1546	3.39844
771641	9.85793	6.15451
774680	28.9609	9.51413
774686	21.4466	6.52969
775893	14.4836	6.69998
777139	48.7333	10.3817
780249	13.8273	6.01868
781291	10.0265	5.63821
784015	10.0985	8.65667
784527	9.58221	3.76641
784769	7.78643	2.82598
785128	11.0603	6.27154
785406	7.28239	4.28888
786722	10.6305	7.23578
787616	6.06498	4.60877
787887	6.56897	4.82421
790224	8.32026	4.07249
791447	14.414	5.82472
791607	13.5073	3.39786
793122	12.9803	5.34924
810017	10.9563	3.77804
810174	12.2007	7.74667
811465	12.8504	5.10178
816449	9.76353	8.82059
816871	9.45679	5.7075
817875	14.5123	2.87326
820066	18.2088	4.29011
821715	7.41926	0.629357
823058	8.89916	6.59187
823916	7.63459	11.2844
823955	21.2329	6.07954
824015	10.9269	5.79712
825250	19.8023	-0.965143
825584	8.37737	3.3251
826002	35.508	4.65181
827462	11.7134	2.7052
828691	10.9068	7.11042
831689	8.79691	7.41731
833261	24.7625	5.2259
834386	68.655	5.43352
834387	10.1891	-1.53599
834958	17.8811	4.41917
835129	12.3019	8.91124
836481	12.0641	6.15302
836878	10.2275	6.78496
837730	10.7657	0.339001
838638	66.1285	9.60055
845887	13.1968	8.03537
846268	9.52666	4.76886
846548	55.9148	5.31191
846612	14.0849	2.83968
846872	10.3604	-0.445156
847314	21.2356	6.19212
848072	37.954	6.43746
849323	16.5087	11.1805
850805	7.2659	-1.45867
851446	9.59189	5.31068
851524	9.59846	5.21071
852782	5.73553	1.96498
853020	8.19808	0.298307
853044	14.5972	2.85049
853084	18.0291	6.9445
854786	29.2609	6.11308
857098	10.3759	3.35364
857902	7.45725	9.99634
858010	7.61979	2.97753
859998	15.3533	5.67138
860523	24.8084	5.24681
861578	7.69777	3.3449
861921	32.5938	4.31318
862797	10.9931	-0.561845
864728	13.9884	4.79608
864872	28.3045	6.67616
865227	32.8276	3.11149
865259	18.512	6.49163
867095	7.64634	4.40888
869435	7.56159	3.92673
870071	8.04244	6.70349
871665	6.9406	-0.472262
872384	18.0346	6.55461
873074	12.1493	-1.20575
873243	9.02383	-5.08105
873286	14.3065	1.0456
877493	6.70889	0.919686
879003	6.48265	3.87007
880055	8.47675	3.62573
882297	19.7587	4.59715
882384	24.1535	5.82206
882504	21.7531	6.76069
883621	8.45654	1.33055
884784	6.67283	1.60401
884860	32.6779	8.88789
888726	11.652	1.21759
890166	9.56265	9.91975
892168	11.9026	1.81743
892262	15.6914	1.99384
892433	40.3547	1.92174
892960	47.6177	4.7521
893171	7.45759	2.74705
893761	7.22094	3.49229
896400	45.7219	7.54111
896402	15.9967	3.56612
896576	11.7062	4.03456
897007	16.8586	1.90086
897148	9.93712	7.51074
897187	19.7538	7.11025
898493	11.3244	4.54583
898619	9.60329	3.73514
898941	7.26128	7.70204
899202	19.9497	9.32441
899291	9.82436	-0.136567
899592	8.31673	3.71041
899960	24.6613	8.38914
900296	9.7845	-0.114637
901137	9.48582	5.46708
902123	12.7314	1.92886
902664	9.95129	5.51936
903149	19.3847	4.14004
906312	15.6815	1.36195
907487	8.66586	6.65113
911947	36.7415	5.74837
913259	7.07999	3.02488
915481	18.7729	2.26205
915573	11.4584	7.31494
917959	26.1497	6.14393
918486	16.504	2.86893
919470	32.1106	4.6984
919536	13.6787	1.75722
920973	10.7805	3.30155
922066	11.6105	5.77847
924809	6.79941	2.21531
925482	10.0833	6.99445
926025	9.4196	6.36906
926097	23.4574	3.40992
926211	8.2599	3.88458
926412	12.7383	6.74825
926511	24.887	7.9724
926615	8.94257	6.75177
926777	46.5348	5.67543
926862	11.2134	7.4177
927356	21.0741	6.64326
928558	18.5799	8.23289
928588	8.62323	5.94722
928879	10.1367	4.34002
929531	8.21676	-6.0616
929673	9.68664	5.05425
930030	10.1575	5.28837
930779	11.3751	2.78068
932723	15.3135	3.18751
933898	17.7154	4.5342
935493	8.31764	6.88621
936890	19.6544	1.80198
937778	19.0403	6.03901
938445	8.30208	7.07773
938478	13.3376	7.02258
938709	43.2015	7.54558
938710	9.70901	-8.61203
940342	11.1565	-1.2589
941064	20.7492	5.6637
942020	9.06806	2.50218
942239	10.5312	2.15144
942289	33.8947	2.93818
942494	7.54651	-1.49215
942644	34.6609	-0.857444
943565	19.8519	2.89901
943769	12.0424	2.13654
944257	7.58428	5.80687
944796	17.6038	4.91618
945291	17.6658	-1.59151
945814	67.2332	4.36591
947514	8.42343	-4.31918
947926	62.2404	7.95162
948017	10.6118	3.5666
948339	11.7654	1.27967
948481	10.2808	5.78548
950070	16.2775	8.3487
950179	14.3345	-0.0599635
951066	10.1898	2.80894
951239	26.8176	2.89497
951240	48.9601	-0.646326
951241	12.3999	7.84557
951285	14.4465	-0.951329
951589	9.66846	2.80189
951736	6.91909	7.95848
951900	20.4828	3.23543
952438	18.0147	2.40786
952644	7.56384	-0.0432966
952667	10.3697	0.821102
953558	7.94762	2.43796
954068	13.467	3.26058
962230	12.5632	5.56699
963499	12.1095	0.455926
965491	9.13692	2.51569
966135	16.0989	2.18621
966814	46.2378	1.12522
966981	17.2135	4.00689
967245	52.6031	5.29859
967387	9.29715	3.32289
968800	16.5915	3.95021
969531	47.4238	7.99997
971054	14.1541	7.70482
971820	12.1583	4.53163
973109	7.89164	6.49862
973762	9.3441	3.88452
974658	11.6961	1.7417
974690	7.37323	0.855805
976264	16.662	6.21823
977213	10.2208	0.0737903
977536	12.2354	5.90002
979150	11.1982	2.81819
980277	9.47138	1.41433
980893	6.39468	4.38533
981013	6.97447	7.06088
981733	8.29096	6.61
982309	11.0792	6.25706
984045	24.8182	2.36127
984391	8.83011	3.43999
985195	28.1742	2.28314
986209	28.2631	5.69084
988496	12.1002	5.49822
989359	8.41695	4.4266
998657	9.02378	3.92029
1002579	9.9907	8.39409
1005036	11.3569	0.937464
1006460	9.71672	1.67594
1007812	74.4446	7.70672
1008770	26.4088	4.30557
1009364	14.2022	3.54659
1010922	21.5449	6.83161
1011376	15.1092	2.94874
1011612	6.50148	5.79373
1012530	9.30635	3.37845
1014006	9.3455	1.48145
1014880	11.6747	0.851619
1015512	10.6336	4.87759
1015873	21.6388	4.21679
1017588	19.9878	5.42265
1017953	11.0626	3.37871
1018494	12.0615	-0.379116
1018838	12.4484	5.09186
1020343	17.573	7.45017
1022014	22.8746	3.79522
1022081	10.1678	6.20337
1023248	10.562	7.95077
1023692	7.34124	8.11457
1025773	34.333	2.97671
1026269	6.44496	5.36363
1026349	14.0844	3.34107
1028599	6.56653	2.37587
1029296	32.7789	4.79095
1030612	13.7815	4.4832
1033018	29.1873	6.29858
1034799	13.2374	5.1109
1041108	8.38871	4.60329
1041927	35.9521	5.10691
1044086	23.405	4.6943
1044691	9.87694	5.20726
1046004	8.04784	1.74972
1046248	14.9849	2.75433
1046516	16.7656	8.72538
1046702	9.24008	6.66631
1049003	15.2818	2.14876
1049224	7.69626	4.84684
1049706	14.4248	9.06785
1054470	22.1986	6.89216
1056170	12.7857	3.44461
1056366	8.89406	3.96463
1056434	8.71111	3.16975
1057215	9.742	3.27166
1058752	13.2619	5.75281
1060068	54.6283	4.00169
1060977	8.7723	0.0689758
1061134	21.1717	4.28163
1061293	9.30712	6.20692
1062842	9.34698	4.72695
1063222	6.38589	7.98128
1065000	7.99696	5.67596
1068262	6.95465	7.55503
1076816	12.4281	4.51341
1080856	6.77396	5.52736
1082149	9.28873	10.4203
1083128	15.1508	6.80293
1085696	28.3196	4.30293
1086804	23.9213	2.54492
1087653	38.8991	0.526514
1088392	12.6202	0.729017
1090988	20.5418	1.01494
1098499	12.1962	4.96704
1100441	12.9869	6.4387
1100891	10.5911	4.54878
1101458	8.2905	0.542665
1101660	17.5813	8.59811
1102151	44.5065	5.90046
1102522	11.0354	7.14381
1109765	16.1886	2.68637
1111196	7.91763	5.55737
1113418	7.8314	1.42654
1116306	21.8347	5.28274
1117365	9.38667	0.124995
1117643	86.3743	9.49677
1117843	33.0893	5.69776
1117882	9.07451	0.0287702
1117904	8.09989	9.34721
1118206	13.3107	3.22118
1118272	11.4439	3.90066
1118502	13.8072	3.46426
1118938	10.611	2.0647
1119014	13.3125	7.1862
1121637	14.1459	7.20507
1122680	13.3927	0.965587
1123241	7.88214	1.23836
1125399	95.5409	6.78822
1125720	9.44295	5.89123
1126338	12.8327	7.02532
1130863	13.4748	8.10799
1141369	12.7026	6.59505
1143247	11.529	4.96354
1143347	19.7532	-0.546323
1145761	8.56369	5.77786
1149483	12.6992	1.47018
1154223	6.38592	3.47121
1154315	9.64389	5.99293
1155956	20.3964	6.57328
1157529	24.2884	6.00127
1158290	7.96612	4.72569
1158763	8.52217	6.99629
1160502	6.60119	5.42914
1160553	11.8269	3.36949
1164280	22.9912	6.56891
1164777	15.3018	3.83887
1166904	9.32458	5.35042
1167617	8.356	3.58681
1171093	15.4281	2.68644
1173674	6.10232	4.47968
1173791	12.0828	5.36957
1174257	7.41592	2.88046
1177069	19.8824	9.17471
1177465	9.0215	10.4514
1181245	9.45737	6.5293
1187183	8.60414	3.64099
1190212	13.3699	7.93167
1191080	25.9115	8.15632
1191775	10.0386	5.52789
1191854	21.7	5.73839
1193463	9.03278	4.84581
1195637	8.57322	6.98716
1197859	15.2755	3.38313
1198726	6.68874	7.87915
1217927	8.41564	9.57452
1224743	12.4133	-0.701352
1227004	15.4584	4.90603
1231386	7.44013	2.74652
1238281	8.83124	4.02039
1239292	11.1898	0.832911
1242096	11.325	3.62217
1244334	11.1754	6.65132
1244533	20.9019	12.3322
1244904	9.38998	3.84648
1259630	8.13137	1.14634
1260872	16.8499	7.14495
1260881	8.63051	7.25969
1263018	10.3056	1.29739
1263141	10.2496	1.80413
1264288	14.3431	5.72411
1265056	11.3256	5.99895
1265961	13.5326	5.15192
1267421	7.98303	-0.0426754
1267836	5.79366	2.85076
1268172	16.1316	9.1777
1268987	7.71515	4.75399
1276266	9.59706	-3.18885
1276758	8.42107	7.42666
1280834	8.36627	7.4202
1282542	15.9979	5.43798
1285505	19.1933	8.2632
1287954	15.1989	4.29324
1291114	15.2075	-0.461521
1292165	7.63989	5.08091
1295281	9.71867	6.60145
1296317	20.4187	4.69222
1296965	7.70058	4.13001
1298465	12.4689	5.72833
1304440	15.0745	8.13628
1307367	14.2524	7.12325
1308035	33.1785	7.46569
1308260	29.9781	10.3599
1309808	27.1454	5.86242
1310681	9.02398	-1.55789
1310682	15.307	2.23682
1310820	14.889	1.4655
1311254	11.7263	1.73713
1311271	7.56523	2.58962
1313054	7.43868	5.68158
1314718	8.74182	6.53772
1318467	11.4548	4.36585
1319646	7.79583	3.42074
1321897	9.00079	2.30406
1322482	18.6498	6.12342
1322719	9.62568	8.25236
1323478	8.38937	4.1641
1325423	8.74996	0.849992
1326048	10.6805	0.534644
1327083	9.18281	4.78191
1331334	11.609	2.72086
1331555	18.375	8.88495
1331693	56.1572	3.12583
1336219	15.0219	4.8291
1336851	7.18863	6.21553
1338695	16.4056	4.52685
1340391	10.2874	6.75688
1341092	15.5588	5.24322
1347031	7.41424	5.58894
1349092	10.6714	1.27678
1350182	7.36951	4.94436
1353420	8.90398	2.48524
1353851	7.29922	8.38175
1355274	9.24958	1.77264
1356761	14.2101	0.208703
1357742	14.8511	7.46254
1358797	18.5674	3.95936
1364803	8.26148	5.47077
1365329	8.66622	6.0657
1366265	21.3033	7.68064
1366440	9.59922	2.34469
1372626	21.9886	7.88002
1376917	6.1427	4.35071
1380288	14.6612	4.06758
1382728	6.94441	6.15435
1384055	10.0595	8.33882
1392481	21.6868	3.47692
1396381	24.0893	1.73159
1396698	12.4687	6.22862
1398991	38.8743	6.98433
1399481	10.9424	7.8624
1406155	7.20003	5.01679
1409880	14.1073	5.69377
1413530	5.86496	4.50167
1418955	9.54721	7.72593
1420269	23.6442	3.94405
1421326	14.8971	7.90016
1422362	11.9919	7.36117
1431988	17.6545	7.2179
1432753	7.50441	3.61125
1434822	6.67941	1.49131
1435669	9.85971	1.68916
1436703	10.9162	4.67119
1441887	23.7008	-0.792896
1456876	15.9158	7.75026
1458049	8.01945	4.27831
1465336	13.6383	0.958997
1471444	6.8006	0.969313
1472730	7.70115	5.33504
1486651	11.2341	6.04234
1487938	18.6836	3.61704
1499307	7.90429	5.03539
1500483	12.6113	4.97516
1501545	12.6956	2.61709
1506896	14.7187	6.4043
1510522	11.1748	7.51527
1511316	20.7051	5.33681
1517262	15.45	8.15882
1522278	10.5196	3.94721
1542482	11.7272	8.67901
1564929	19.084	6.76441
1567918	7.87845	3.97645
1569678	9.70238	4.42679
1569684	12.8193	10.1261
1581641	11.216	10.2408
1593643	39.2202	-3.56517
1593644	20.3809	-7.59571
1593645	11.1323	5.06923
1593646	192.228	-6.14108
1593647	33.6788	-10.3223
1593649	9.81225	-8.35943
1593650	30.1544	-9.48704
1593651	78.1549	4.44992
1593652	33.6788	-6.37274
1593654	9.81225	4.16504
1593655	25.713	-8.35464
1593656	8.46498	-14.006
1593657	8.33119	5.9527
1593659	10.4898	-15.027
1593660	15.5075	4.67668
1593661	8.29331	-5.16052
1593946	14.5322	0.760309
1602313	12.0821	4.41077
1603544	9.85433	2.76818
1613395	25.7882	10.7577
1617314	9.45587	7.50643
1617349	17.7721	5.25732
1617944	12.1079	4.15439
1623613	16.1231	3.96422
1630861	7.04124	6.32476
1631433	6.93255	4.71115
1631925	14.9252	2.94296
1636260	8.76886	4.67119
1637836	12.6479	5.07923
1637863	10.8978	5.51313
1638103	24.2506	5.05644
1638807	12.5708	5.12595
1641079	19.7278	5.60564
1641994	5.7046	2.53857
1649984	16.6181	6.61561
1652020	13.5024	7.66713
1655403	9.39269	4.31019
1658183	6.78635	-0.726456
1658188	10.4099	6.59066
1660480	17.3871	8.47326
1663414	10.7869	5.36551
1663698	6.91831	1.66531
1664517	6.78584	2.48499
1667956	6.19077	0.598908
1669244	7.02317	8.14775
1670310	12.0313	6.63665
1670439	15.1179	5.14472
1671270	12.7657	4.84508
1671542	6.66287	4.6487
1671912	9.96778	5.26421
1674541	20.349	6.38282
1678325	10.34	4.22618
1687207	9.888	4.59296
1690351	22.3244	7.3772
1690562	9.21642	3.43091
1692389	13.5641	6.13055
1698397	8.67907	5.68693
1699744	8.26787	7.27624
1702228	14.123	7.91564
1702763	8.55976	2.44389
1708340	7.64233	3.10892
1709215	27.4359	6.39247
1713405	16.8465	4.41187
1715291	12.8423	0.00308531
1715606	6.09169	2.43689
1718451	8.1878	5.09202
1718679	11.4481	7.41178
1725973	9.81707	7.84064
1729256	7.67141	3.4332
1732159	19.0497	7.77224
1732745	17.3383	3.82297
1734297	11.6076	5.58757
1754902	10.3417	4.71181
1755363	8.91574	4.49541
1759157	31.0071	8.17249
1761885	8.43546	5.11298
1762671	10.6086	7.75549
1762927	21.0153	6.94915
1762992	7.68232	4.53982
1768298	12.7426	3.81873
1770059	11.1349	3.65448
1777730	9.81248	8.1093
1780360	7.261	3.37901
1781102	6.23139	7.76673
1790738	8.33273	5.89595
1800356	10.6764	5.20645
1802303	22.7523	5.06294
1803065	11.7585	5.07269
1804795	13.205	4.50187
1808813	13.8013	8.43089
1818343	13.7611	5.47998
1820392	10.4369	-1.62168
1822475	11.8049	1.43913
1824633	6.89555	-5.4681
1824640	88.3622	4.40255
1824906	8.41481	1.57364
1829201	11.8635	3.97905
1829625	6.85746	1.88723
1834125	7.57522	6.64339
1834655	7.8768	4.29227
1836832	6.42811	2.50028
1846636	9.05161	3.60813
1846688	5.94419	5.2945
1849917	6.60097	6.0764
1851474	6.90637	1.18819
1852982	14.7165	7.98735
1853019	12.4398	3.03122
1853638	15.9827	4.98254
1854724	8.55563	5.72837
1855045	11.8275	-0.0497714
1855168	14.2414	4.68236
1861476	8.55993	2.55436
1863457	8.21189	3.00542
1865840	11.2371	4.3243
1867730	9.76889	4.01766
1867776	9.52687	4.44781
1869435	12.9299	1.05972
1870490	10.5698	1.94327
1878186	13.7204	5.67735
1878378	22.2777	6.29695
1880905	9.12468	0.239029
1884528	15.0247	7.16351
1885707	22.0196	8.65799
1886404	9.50225	4.6078
1886405	10	1.76168
1887432	10.1132	2.88336
1893469	13.3123	7.43069
1894003	12.5723	7.55441
1897976	9.9615	5.63838
1901065	11.3054	9.10566
1902135	9.85241	4.46378
1903512	15.9429	4.87391
1903857	13.9379	6.23019
1904214	12.4766	10.2366
1912130	19.2541	4.56675
1912635	6.4504	6.14144
1912691	9.43535	1.4578
1914587	8.60249	4.49589
1914932	21.3159	7.70794
1915929	7.7709	5.38079
1919037	17.5941	4.41164
1920088	11.203	4.5034
1923159	23.3282	2.61054
1924629	71.034	7.54067
1930110	8.62419	0.0637111
1930213	9.16295	4.61979
1931936	10.3918	10.5496
1932242	9.31775	7.93581
1934268	7.4467	5.01629
1934670	16.5336	8.0645
1936822	19.5518	4.56212
1939660	16.1467	5.13673
1942240	13.2793	4.04157
1947470	8.56852	-1.72527
1951089	22.1057	4.46061
1951529	6.44753	1.67912
1960013	20.6014	4.56926
1965208	54.4373	4.74911
1967585	10.9122	4.37684
1968847	10.7461	8.01586
1973760	14.2751	6.21728
1975932	11.0058	6.36258
1976612	9.54008	7.71119
1979140	9.56231	4.71853
1981919	14.0691	7.8624
1982409	48.7887	6.98433
1987052	10.1472	8.53802
1987548	10.9199	2.54101
1988222	19.5153	4.35159
1988451	12.9843	3.02552
1991615	9.64212	10.0162
1992685	7.80725	2.37544
1993607	37.6618	6.26697
1997014	23.4275	8.38792
1998135	11.1282	5.27777
2001342	7.95685	4.29489
2001784	8.14121	4.784
2004204	25.577	4.06966
2004209	8.86287	-4.29009
2004214	8.86287	0.230816
2005670	16.9722	5.15282
2006568	10.9463	3.99853
2006621	22.6257	3.59623
2006792	6.27869	0.912287
2016594	6.71024	8.22341
2020975	23.3443	6.99935
2021611	8.5479	2.92186
2026228	9.12919	4.12749
2028142	8.72244	2.41655
2028691	15.5399	6.54136
2029294	7.78252	3.69362
2030172	9.33429	9.61899
2030174	6.84267	-0.0579274
2030243	7.98538	3.97325
2034153	12.8175	5.60868
2035632	11.2413	2.09316
2036477	38.1759	2.65335
2038135	12.2897	-1.44987
2038295	21.9506	8.38974
2042699	7.86213	1.06125
2044428	19.2902	5.30612
2046219	7.39548	0.363212
2046589	10.2932	0.332045
2047281	8.3946	6.11499
2048795	6.31991	3.89966
2049623	9.81101	3.95618
2053812	16.4986	7.13186
2054305	12.8588	3.03032
2059032	12.3544	1.64772
2059273	10.7975	10.5082
2061390	10.7601	7.2206
2070006	13.2228	7.8162
2070496	43.9002	6.92594
2078138	14.161	4.66996
2081862	8.5828	4.87618
2083905	11.5583	5.76345
2085283	9.74078	9.8359
2089619	21.1258	8.30826
2091738	16.3383	6.70362
2094833	12.6407	2.82743
2095658	9.15543	4.32671
2096937	7.23346	-4.76375
2105596	13.7674	7.8624
2106086	39.3841	6.98433
2107389	10.0706	-0.919496
2107716	15.4952	-2.31154
2107965	9.73806	2.98516
2108102	20.5618	6.88138
2108358	9.25007	4.53123
2114773	44.7638	1.31351
2115823	14.5213	1.08561
2118467	16.4459	6.16155
2119731	12.9803	3.45728
2121610	10.6661	-3.23025
2125895	8.94587	5.30741
2128611	6.71909	3.43815
2128636	90.2821	9.35968
2129328	34.8164	8.19926
2129744	11.3398	8.29119
2135238	17.6111	3.07903
2135688	10.9595	4.39224
2135759	7.94124	2.32074
2141289	12.6411	3.18006
2141469	8.03484	-0.668884
2141921	11.0503	5.5867
2141985	9.75236	3.7203
2142339	11.606	5.06656
2144333	11.8792	6.21977
2145987	9.02529	4.22214
2146089	22.9464	10.992
2147544	6.57014	6.10866
2150223	11.7833	3.98449
2152058	15.7834	1.86895
2152383	12.6971	3.7335
2153459	11.0528	3.68846
2157954	10.6477	7.41843
2158242	7.41394	7.93187
2160185	14.6617	10.5068
2161859	8.19912	4.94822
2165843	20.5102	10.5253
2166562	6.73129	4.96862
2168070	9.32665	4.03738
2170600	21.3697	2.47066
2170739	9.42659	6.97576
2172721	9.07853	0.875927
2174833	16.7969	4.29884
2175352	39.2718	3.51991
2177278	8.33081	0.53044
2178706	15.1407	7.8624
2180434	10.0767	5.63694
2181054	9.92459	4.71307
2185653	8.3299	5.78258
2186570	10.234	2.70247
2189000	9.68528	4.04834
2190533	9.25599	7.71596
2190825	14.9271	13.6767
2191181	7.46114	3.54809
2197365	15.8789	-0.0694622
2199159	23.2415	5.68253
2201970	6.70119	1.09021
2203059	19.1208	7.636
2203906	9.86193	6.38124
2205604	15.7238	4.93712
2206141	12.4885	6.68967
2209984	22.9949	11.1214
2211157	6.40183	3.16085
2212536	13.1551	5.83191
2214738	14.2633	3.781
2216277	19.6827	7.13418
2217370	27.1232	6.25232
2219196	19.1662	3.34454
2220220	29.9219	5.47375
2220734	10.2866	4.31263
2220993	8.27629	7.18876
2221936	6.16939	7.26786
2223822	18.296	4.31314
2224509	11.4034	0.668306
2225491	9.1778	5.86403
2226428	7.83232	0.0929849
2228158	26.5179	9.01336
2229911	8.78212	0.16029
2231523	8.19992	2.14695
2231942	12.3717	4.61819
2232427	10.8831	1.32662
2236686	12.0843	5.8505
2236851	15.3476	4.75258
2238715	21.1865	6.39302
2238767	9.40403	3.54147
2238884	10.5444	4.78027
2239710	13.831	3.82824
2240935	11.3099	6.55762
2244023	6.9013	4.76455
2245110	8.29711	2.9652
2245617	7.47392	1.20869
2252124	8.48645	7.48194
2253082	15.7515	5.81194
2253176	9.44758	5.43872
2256032	15.1762	6.42047
2257046	13.7272	4.28075
2258160	7.9024	6.07152
2260867	15.0407	3.19305
2260887	13.2937	3.61675
2261244	8.71195	-0.758952
2264371	8.41507	3.56205
2265803	23.3095	6.96727
2266135	7.36069	1.68221
2266556	15.0337	6.96197
2267050	8.97319	8.48263
2268711	12.3869	6.18869
2269221	29.7372	3.44255
2272062	8.27726	5.86726
2272827	8.00437	7.09476
2274237	11.424	2.09954
2275213	15.36	5.63818
2275579	6.92154	5.93653
2275966	23.3347	6.77604
2276741	14.3631	1.51524
2276827	9.11913	5.69067
2277029	10.0616	3.93253
2278240	10.3972	6.94963
2278805	10.5747	5.79369
2279416	8.04201	5.03633
2280214	10.9204	2.6051
2281378	21.4281	7.27109
2282841	7.71712	6.14682
2284210	30.4472	5.71458
2286536	7.42133	4.43477
2286697	17.0163	6.5208
2288019	8.14378	6.50023
2291279	23.9643	7.64438
2292196	9.21586	-3.60324
2293963	15.0642	7.8624
2294453	45.2406	6.98433
2294994	27.8479	6.68906
2295119	7.24573	8.11065
2295444	15.9261	3.58519
2297108	20.0709	3.84219
2298108	14.1183	4.92457
2299593	8.02241	5.5663
2300484	16.2713	-0.361374
2302457	8.60367	5.4031
2310436	16.2195	4.43236
2311186	9.11778	6.35067
2313350	7.81609	3.88372
2313427	8.52541	6.62299
2315729	11.9502	7.51247
2324695	20.1882	8.10945
2326503	12.2286	3.05424
2329772	8.51975	7.51751
2334728	23.8375	2.45763
2335295	9.10925	4.14355
2336208	10.1153	4.17813
2338228	11.1997	4.28497
2339553	10.9187	3.6011
2341691	16.2601	6.93754
2343457	11.8269	4.83816
2350784	13.5713	4.99885
2351300	11.8926	8.43567
2352383	21.6223	7.41512
2354308	6.05215	1.40739
2354356	6.412	6.31276
2355699	63.7119	3.78978
2359379	12.9071	7.98167
2359528	10.0446	0.875386
2362748	46.4015	6.93738
2362982	9.53876	1.54928
2363276	17.9894	5.89549
2363747	8.73823	3.80769
2364439	9.13671	2.43457
2364492	9.01558	6.06141
2365430	7.92406	0.472141
2366198	18.1308	3.13172
2366377	11.0488	3.93414
2367289	12.7657	5.65178
2367789	9.34641	6.29216
2370465	18.275	5.61294
2370553	8.15363	1.32714
2370554	11.5415	4.23947
2371764	6.89048	6.0729
2371802	11.242	3.8737
2372286	8.64328	0.935542
2373752	8.82889	4.57761
2375705	9.65247	5.4171
2376333	11.1018	3.39949
2377680	16.5593	0.520591
2378093	16.6083	0.125015
2379984	11.7099	5.55907
2381700	6.58926	7.37683
2382005	8.23643	3.8051
2383378	34.0536	1.68255
2383724	17.1607	4.97628
2385580	11.0859	5.87684
2386695	12.6033	8.62297
2391390	9.63937	8.06994
2392944	17.233	4.25981
2393280	15.7865	5.02482
2394900	12.701	4.68606
2395885	21.5603	3.79796
2396432	21.2528	1.5135
2396594	16.7162	2.79442
2396759	21.516	5.12022
2396946	33.3243	10.4823
2397429	9.00741	4.57421
2398047	7.37261	6.45789
2398357	7.84811	-5.53968
2398358	27.2746	-0.334819
2400721	7.34778	6.34843
2401131	23.1088	0.303228
2401223	13.9434	5.63156
2401628	27.6147	7.51417
2403171	35.5649	9.1411
2406437	8.66036	2.10847
2408758	11.6133	6.55883
2411593	8.9625	3.47064
2419286	6.20883	1.76239
2423077	5.28043	-0.196604
2425977	11.5695	7.92597
2428926	9.43874	2.28736
2429860	8.37506	0.243087
2430728	11.1143	1.79231
2431174	11.4301	2.56381
2431567	10.4375	4.09137
2432696	19.6598	5.36325
2433244	11.1468	0.107731
2434418	10.7628	2.40617
2434628	10.1973	0.413548
2438993	13.0047	7.78183
2443370	6.60578	4.2848
2448586	14.2795	6.40942
2453639	10.4525	2.44237
2454129	10.2518	1.78284
2456990	7.46542	6.37509
2457594	11.2358	2.48492
2463626	9.02071	3.56558
2466188	7.47523	4.95602
2466875	9.77807	5.81351
2466997	9.4181	5.81896
2467520	9.90567	6.21934
2467665	8.98246	2.57497
2468617	17.539	5.85683
2469146	18.8066	-0.595873
2472410	11.1677	10.1247
2478329	8.46185	0.928153
2479972	11.945	1.81598
2480372	7.2032	3.24251
2480498	11.9078	7.97347
2481883	8.98639	5.04654
2483786	5.4051	2.73671
2483837	5.68833	0.486361
2493506	14.132	0.302541
2494043	10.757	3.4476
2495869	12.1622	6.37102
2498069	14.5716	2.0396
2501749	13.6487	7.32304
2502641	15.1717	2.09598
2502890	16.5258	2.0385
2503585	11.5592	-1.50061
2503590	12.7397	-10.9581
2506015	21.0691	8.36951
2508713	11.3703	5.45005
2508818	8.7182	5.53535
2512040	9.42278	4.27651
2512684	9.75256	4.20566
2512755	14.4156	4.4614
2513265	11.1734	6.456
2513449	8.46956	0.399176
2514359	13.0596	4.02331
2514781	11.9689	4.2548
2515516	8.93436	6.66917
2520812	22.8632	3.734
2522044	11.9591	6.29572
2523401	8.81664	3.25247
2525509	6.24388	1.85499
2526160	12.5557	-0.900674
2528244	13.589	5.22326
2528322	11.7796	4.85025
2532474	6.73573	1.45893
2533699	12.9281	3.95057
2534929	10.5042	3.34477
2536389	11.0399	7.05468
2536553	29.0181	1.83024
2538163	8.12472	1.76162
2538972	14.7415	0.767142
2541037	20.2085	7.40686
2542286	12.6973	3.43238
2543172	17.5743	6.08268
2544056	17.9444	7.65807
2544214	8.01089	5.00477
2545021	13.549	3.84117
2548636	10.3941	7.21914
2548828	8.79739	4.03811
2553020	9.58753	7.32212
2555667	7.76987	7.78495
2556959	7.89046	6.19831
2561093	7.84986	7.36383
2565710	26.3104	4.94813
2565785	11.3762	9.12042
2566334	8.90035	2.65489
2569335	17.1512	3.93079
2571273	6.79456	2.90147
2571361	8.78773	2.68592
2572597	13.0158	-0.955333
2574216	6.46386	4.44369
2574741	14.1943	7.05063
2576319	32.2225	2.78229
2576840	11.3825	0.991042
2577306	17.8768	6.43097
2577543	13.6857	9.30986
2577945	9.09583	5.94618
2578775	22.8601	1.37355
2579370	5.97491	4.90164
2581664	21.2733	-0.231426
2582368	13.2503	6.05784
2582410	8.38744	2.4152
2585116	9.50635	7.21204
2585805	9.06992	3.08707
2589424	6.90088	6.2431
2589513	10.0696	4.74315
2589762	10.2101	3.03376
2590539	12.307	7.19881
2591512	7.75286	2.70761
2591957	6.01003	7.21911
2593128	40.1195	4.98801
2593299	10.4076	6.08955
2593692	16.23	4.69145
2593974	10.04	9.68429
2594004	12.8378	5.32191
2596203	13.6249	6.87753
2596955	7.79617	5.62146
2599538	9.67535	1.72091
2601296	21.6687	7.96788
2601327	22.6736	3.55746
2601563	7.56887	6.08311
2602224	25.6371	10.7099
2608148	9.81803	8.55869
2609019	12.9124	2.95925
2614705	7.33641	7.72553
2616707	15.9778	7.24621
2617637	8.60946	0.395261
2617667	7.52843	2.62019
2618430	9.7579	6.20215
2618533	12.1291	1.84806
2624177	15.7076	5.16219
2624254	10.9595	6.04362
2625279	19.6766	7.01723
2625535	6.70925	0.177402
2626571	11.4236	4.05654
2627606	15.6646	2.77401
2629900	10.5119	-0.0393872
2630412	19.8446	4.576
2630960	19.0798	7.16201
2631200	8.94054	5.1648
2631223	8.48582	3.19807
2631421	12.4103	6.04001
2631737	20.6881	5.64397
2631928	10.7768	6.27255
2632450	9.08513	8.10404
2633260	28.9797	7.64818
2634734	11.1758	7.22937
2635419	10.7773	-4.18109
2635420	23.1516	4.39175
2635534	18.5753	8.9333
2637049	12.4968	3.61023
2638283	9.9996	5.40189
2642671	21.2924	3.8262
2644219	17.8188	-0.7251
2644225	19.0664	3.94015
2647886	16.9805	2.5823
2648799	16.0039	6.87031
2652293	13.9614	0.828263
2657311	23.4131	4.99389
2658091	8.50031	6.76294
2660544	11.4533	5.05043
2665382	7.91527	1.90281
2672957	10.3964	1.25957
2673125	13.2645	2.5621
2679146	5.40277	2.13659
2680483	7.15504	10.8256
2683876	20.3752	5.68883
2684925	11.6188	6.38132
2685861	11.1242	4.5805
2687807	14.1574	3.65771
2688923	8.5371	6.0316
2691658	9.32608	2.91838
2693606	22.342	0.668291
2693707	38.6895	9.41975
2695167	12.1688	8.33299
2696735	7.32294	1.48223
2697475	16.6256	8.62305
2698572	10.7826	7.01645
2701610	14.7973	1.98557
2703000	5.56427	-0.574678
2708133	14.2117	5.30334
2712952	14.9447	4.08636
2713167	7.85942	5.57118
2713732	11.575	6.06419
2714887	11.681	5.88364
2716720	9.85708	6.45937
2718749	36.5727	9.28131
2718942	11.6026	1.78146
2721598	7.65544	3.07584
2721850	9.16433	1.72315
2721852	31.1797	1.35628
2723164	13.7734	6.45556
2723751	14.0233	4.27752
2724757	28.0632	0.0768112
2725666	15.338	1.57899
2727005	7.40847	5.08718
2729365	12.4563	3.46135
2730003	17.8888	1.54959
2731043	25.683	3.65697
2732003	6.78521	6.95986
2737472	10.9657	1.01891
2740322	9.48872	3.21284
2741721	15.8486	5.32581
2742143	10.1256	3.79359
2742189	14.0589	4.00373
2742376	12.0939	4.05712
2742490	21.3317	5.61533
2742793	13.9484	6.21064
2742913	7.27815	-0.279848
2743051	10.7682	1.70242
2743645	14.4025	0.96036
2743827	12.6786	3.00637
2743832	8.71318	-6.06607
2743837	7.83632	2.80341
2744001	22.9585	9.25765
2747204	10.6409	9.03827
2749855	7.34443	5.10353
2751164	16.8222	1.32064
2753877	8.73871	7.7205
2754726	9.17309	0.934825
2754919	23.5194	5.69102
2755577	9.07673	5.90453
2756023	11.129	6.41442
2760444	9.76911	5.73258
2762951	10.822	3.49563
2768676	5.44143	6.34644
2770215	6.69219	7.94869
2772066	19.6598	5.47993
2772694	21.859	8.96644
2777525	11.6136	2.49839
2778357	8.21942	3.89348
2780107	12.068	5.34619
2785052	10.7769	2.54324
2785544	8.46809	4.18557
2788917	11.3775	6.19369
2790066	7.09849	0.264351
2792073	10.2306	5.23489
2793994	5.87208	2.97875
2796637	7.02022	3.72351
2799817	17.4081	4.46549
2799917	9.47113	1.74209
2800109	9.22941	5.21987
2800744	9.00322	2.89913
2800819	33.5438	10.3942
2801012	12.1294	7.75662
2803586	7.20949	-0.925722
2806098	31.1812	10.8748
2808523	14.3204	5.96181
2810015	11.6185	3.38616
2812085	10.8592	3.50299
2816104	12.2254	2.53014
2816940	11.0511	-1.98614
2817281	11.5663	4.45909
2819859	28.4351	2.04286
2820760	14.19	5.34247
2821765	11.725	6.75435
2821777	29.2863	6.86938
2822061	15.217	1.35008
2829570	9.38748	5.63923
2830923	6.49886	8.76684
2831850	10.6604	8.55139
2835640	8.90599	4.40661
2840871	9.24815	6.61213
2843231	9.51393	5.37676
2852620	7.91265	5.28069
2853509	9.59757	-0.102567
2858029	10.6138	-4.54224
2858235	11.2126	10.9885
2858995	7.44954	4.30163
2860535	9.55476	4.44639
2860816	8.06179	7.46063
2861632	8.13873	2.34962
2862871	11.4937	5.80274
2865324	16.0375	6.75207
2868401	9.91501	1.14805
2869218	11.4005	9.95407
2870046	10.222	3.68788
2870810	13.1658	2.20377
2870955	21.6531	4.96689
2871872	18.088	7.36807
2871919	6.54233	7.55966
2872126	19.4559	7.75517
2875701	18.0798	6.32985
2877714	15.1634	8.30683
2879171	8.21524	3.98139
2880220	10.7085	-2.42663
2881848	20.1657	4.64531
2882421	17.4812	-1.45818
2884696	13.4623	4.79364
2886147	9.88759	5.42383
2886258	14.5338	7.36982
2887865	7.30339	4.95405
2887907	35.1637	7.92107
2889945	16.9598	4.34255
2890433	7.94362	9.54808
2893207	24.5151	4.16564
2896386	9.67343	-0.0393546
2897458	12.5309	1.9358
2897884	13.9697	4.9793
2898155	21.6215	6.9484
2898896	6.47604	4.56145
2900753	22.8128	1.01713
2901188	6.63818	0.564731
2901618	67.373	2.54296
2904026	8.79198	3.80903
2904118	19.5863	0.994114
2907110	11.3923	2.25622
2907244	36.3854	6.59934
2909514	7.17349	0.922013
2913327	19.2946	6.20158
2913527	18.094	5.50675
2914730	14.6078	4.81727
2918265	6.72675	-1.0562
2918290	18.672	5.42983
2918593	20.1682	4.47211
2919743	6.49891	3.5483
2921909	9.55828	5.07926
2922671	11.4569	4.46602
2926021	8.95074	4.10109
2927945	11.1771	6.81039
2928155	12.6501	10.9816
2929251	10.1751	-0.0985516
2929733	9.87489	6.58422
2931282	25.3592	2.68868
2931995	7.32873	2.98802
2932035	15.3748	7.4119
2934845	13.6907	1.45957
2939343	7.18136	4.8348
2939376	19.0776	6.80011
2940499	15.4114	5.87848
2941085	6.12538	8.47361
2941481	8.00066	-0.92573
2946662	7.26592	2.19968
2949201	14.007	3.96686
2949388	8.66307	3.97413
2950897	6.73353	5.30426
2950911	7.94452	-1.05947
2950966	19.8744	8.20523
2952253	30.3844	11.4608
2953315	17.7134	2.10158
2953951	13.4879	5.73443
2957050	21.9799	6.42542
2958497	9.47571	4.01323
2959583	29.1586	9.48858
2964987	16.6621	9.25737
2966250	10.5592	6.18747
2970012	11.1836	6.20664
2970332	10.3542	3.24286
2970850	24.2486	6.25943
2970921	17.4638	1.85599
2970937	7.41866	2.5015
2971730	12.2249	6.1266
2972232	11.1979	5.32177
2974799	26.3334	4.07688
2975189	20.1126	4.13281
2975257	8.15506	3.88042
2975835	9.98892	-1.00925
2976898	13.968	11.2956
2979756	24.9465	2.6615
2979846	11.6281	0.67183
2980594	29.8923	3.67471
3002087	13.1931	4.45257
3003824	19.9945	2.5334
3003886	36.7876	8.88243
3006371	23.1399	2.76468
3008249	8.21367	6.46102
3009663	10.4807	5.85802
3009698	10.8904	2.15962
3009807	9.11744	3.13149
3013132	16.8408	4.17145
3016015	8.04849	1.41128
3019520	6.79371	7.3032
3021015	7.90106	1.53126
3024271	18.8449	8.01838
3027530	7.43472	11.0415
3031186	5.57973	3.79002
3031965	15.0456	8.08408
3032125	7.61166	1.41733
3033043	21.4706	4.99329
3040082	18.0556	8.63999
3042494	14.0947	5.39389
3042740	16.4338	5.91828
3043825	11.1781	3.46998
3044300	10.6628	7.84097
3046082	13.9035	6.30492
3047553	16.0094	6.63317
3047974	18.6105	1.18576
3051086	11.6537	6.69467
3052141	13.447	4.32815
3052758	7.14658	7.33607
3053561	24.129	9.61547
3054032	9.29201	5.26557
3060246	26.8918	6.3431
3060445	22.0616	5.06746
3062545	9.50176	1.16773
3065116	9.86931	4.54114
3067946	7.21994	2.1832
3067973	15.4934	4.137
3068538	24.1167	6.35251
3068973	7.15793	0.651296
3071952	10.6134	7.0112
3073135	15.5126	6.30937
3074365	10.5866	4.74611
3079514	17.0111	7.18418
3079667	14.5289	5.06855
3083169	13.3102	6.73403
3083367	6.5073	7.73293
3083418	8.62731	5.47127
3083569	7.35477	-1.03791
3084346	10.2314	0.215255
3085404	9.83728	1.10166
3086522	14.9352	6.98132
3086717	11.9856	6.56748
3086967	8.06251	-0.590517
3087248	7.98606	5.73541
3088054	9.85058	3.75471
3088641	8.01439	-1.6096
3088778	8.00757	1.82005
3089393	8.28973	3.99845
3089856	19.8429	8.97286
3091337	8.09376	6.8092
3091679	9.93771	1.68296
3094613	13.0943	4.1505
3094996	12.0896	1.90181
3096619	13.2409	3.54322
3097713	8.30856	2.17868
3097856	11.3369	4.70587
3101106	21.7769	5.79914
3104489	16.9328	3.88984
3107063	19.497	9.15338
3110211	14.8808	0.432611
3110670	18.541	5.1517
3111896	12.3506	3.68922
3113860	26.1667	5.28999
3119536	8.63247	7.24417
3121954	7.59765	2.26577
3124967	15.3059	3.78592
3125158	12.348	7.26583
3125855	11.9262	5.66136
3126340	11.4573	7.46966
3130035	31.5938	6.98433
3130525	10.97	7.8624
3132311	9.3394	2.41122
3137655	12.4954	3.42201
3137730	24.1567	7.4558
3137951	13.3308	2.98412
3138819	15.0267	4.03848
3140406	14.2803	5.8012
3140836	8.90759	6.42747
3141123	14.5533	4.39753
3141321	11.0135	5.86484
3142457	14.5079	3.22108
3147814	11.6611	2.37957
3152482	11.356	-1.73104
3154279	16.2589	7.53082
3155584	15.423	4.16721
3156226	22.7199	7.09666
3158949	5.73845	1.45741
3159621	14.8992	4.30438
3161757	14.7777	2.01212
3162956	6.43517	2.8024
3164956	9.65752	5.8132
3165730	5.07107	3.7126
3166279	10.5464	1.8987
3168255	11.7423	7.43444
3172524	9.07389	2.01125
3173949	6.11332	7.55449
3174216	7.47947	2.62491
3181071	11.8455	5.85437
3182452	34.6602	5.99878
3183694	12.6643	4.96621
3191710	8.93369	1.81813
3192733	23.0887	2.99628
3193352	50.49	8.85552
3195118	7.9497	5.29797
3197937	7.34203	5.21572
3198414	6.34615	4.76448
3202103	15.2272	5.84843
3204831	7.5626	3.88148
3206830	15.9178	10.8489
3207326	8.95145	-3.17753
3207767	10.4564	3.49325
3211916	8.82408	5.0117
3212230	6.04307	2.55579
3212555	9.97677	5.65858
3213070	8.2758	9.09829
3216027	32.5379	6.82791
3216145	11.5905	4.73857
3216188	6.13235	5.73261
3220104	11.6272	6.34594
3220329	9.21763	6.62464
3220830	10.5249	4.43175
3221555	11.2983	4.38175
3221795	9.90072	6.19959
3222497	19.2016	3.89616
3223949	6.48927	2.32418
3224231	18.7675	6.47324
3226706	12.2893	8.73529
3228250	12.2627	9.30455
3229993	6.28824	1.54654
3232836	10.1601	8.25868
3233175	31.7427	6.465
3242161	12.4985	3.7259
3249403	13.9498	5.96298
3249657	11.8419	4.83648
3251061	14.5487	7.79009
3251967	22.365	4.92119
3254628	9.95917	-0.518647
3254858	8.47193	5.8884
3254874	12.5326	4.891
3256649	10.4688	-3.3491
3256651	8.35843	6.37338
3256929	13.6198	2.75816
3258961	10.8272	7.1661
3259743	7.09283	4.5053
3262857	9.05135	7.8624
3264483	7.77827	4.05189
3271880	17.6049	4.05132
3271906	9.72897	6.69532
3275271	19.9323	5.20758
3276920	9.6827	5.20164
3278164	13.8619	4.16237
3278352	7.37382	4.85784
3280279	13.5325	5.13302
3281513	23.6525	5.62267
3281634	11.3691	5.08037
3282721	20.287	0.484716
3284398	6.96924	8.04643
3286405	13.643	7.23016
3287030	6.46955	1.01136
3287482	6.68084	4.46155
3287830	9.25913	2.15865
3289126	24.7468	4.15069
3289811	6.74192	4.93898
3289870	11.4429	5.22989
3291591	11.576	-2.45937
3292292	11.8481	-0.144289
3293687	8.33042	4.47657
3294110	11.5784	5.76406
3295391	9.9903	4.66017
3295421	24.3815	5.84592
3297103	6.2383	5.76908
3299474	8.59727	5.16859
3301473	6.73174	7.69239
3308342	8.92031	8.30663
3308687	14.4175	3.76007
3308791	7.84731	5.15211
3310591	21.8129	7.16441
3311340	10.333	4.30444
3312537	18.7691	8.15398
3313333	8.65569	4.11905
3314098	9.405	0.814123
3317754	17.6905	3.30441
3318983	24.523	8.7903
3321603	10.7469	3.7245
3321655	20.7202	1.3612
3327492	12.9855	5.83934
3328143	9.75063	1.92684
3328802	9.10289	4.81873
3329577	21.4354	6.95049
3330893	39.8778	4.40709
3333307	22.8172	7.04945
3336445	12.4506	8.11337
3337446	7.34285	2.62041
3338346	46.5221	8.43188
3338942	20.2735	7.38497
3339273	6.6417	5.72519
3340705	8.87933	4.83962
3343624	6.07591	7.86294
3343978	7.96818	1.14601
3347538	40.7263	5.77416
3349043	10.4383	4.22932
3352187	27.4351	6.37068
3353446	12.0393	2.29273
3354709	9.36033	4.23021
3354987	52.7883	10.4854
3355914	11.6138	6.88287
3355955	16.4979	8.03581
3356451	24.8378	6.01234
3359861	27.635	8.62283
3360153	11.2063	6.38457
3364262	8.58247	2.37918
3364642	18.018	1.08523
3366205	7.44666	6.89473
3366353	16.3275	5.73517
3367121	8.22052	7.8624
3367611	36.4565	6.98433
3371321	29.9602	5.44264
3371815	10.7544	6.65941
3372210	21.6856	6.32537
3373691	25.4085	4.69224
3374692	11.8025	1.75535
3374766	11.023	8.82599
3374920	16.3974	5.58024
3375055	26.9448	0.578202
3375147	12.9632	7.25062
3376144	5.52845	3.32906
3376471	19.6748	4.72476
3377614	11.628	6.09945
3377629	12.2361	7.11361
3379662	9.66349	4.80597
3385199	15.3817	5.02236
3387230	14.3245	3.21482
3387680	22.1675	6.30126
3387682	13.4989	3.97709
3387708	17.004	-1.32316
3389953	12.0482	7.71168
3390067	14.5293	10.0693
3392800	8.2614	4.2422
3393070	12.4255	3.1101
3393344	10.4698	4.61849
3393734	12.5528	7.79938
3395282	13.0812	3.78433
3396506	8.99406	5.42254
3397869	9.7715	4.83495
3398037	8.46537	4.76477
3398084	6.27553	3.61853
3398992	7.19511	4.36009
3399055	28.1458	7.17277
3401944	10.9	4.73258
3402605	11.7299	5.08273
3404443	8.81813	5.41948
3407581	10.5363	-3.97007
3409021	6.65851	0.745496
3409023	17.4674	8.66697
3409443	30.6135	11.2049
3409620	9.65644	6.05553
3411763	13.56	6.56399
3412426	7.1922	2.01533
3412692	35.5215	9.49943
3415058	14.0247	3.87033
3416755	19.1846	5.29384
3416869	9.29914	5.69048
3417061	6.55012	6.53664
3417350	14.1723	0.687668
3417758	11.3288	2.45811
3417883	28.5964	7.16363
3418792	15.2563	7.01865
3419077	5.94026	4.16189
3422204	15.9076	9.33626
3422817	32.6984	1.11334
3422831	68.6056	7.58562
3423544	51.7789	6.78929
3423598	11.1121	6.29089
3423687	45.7111	7.12201
3423832	28.7152	4.03725
3424132	33.5396	0.406054
3424213	11.9376	2.08938
3424333	18.0027	4.96015
3428086	12.5395	4.09453
3428724	13.0123	1.54959
3429078	6.50076	7.12009
3429764	13.4916	3.01778
3430671	20.6591	8.12144
3432255	7.90987	4.66045
3432962	7.11809	3.98945
3433135	6.47532	-4.14274
3433640	6.74441	2.30836
3433727	6.9612	3.39877
3435138	8.49882	3.40025
3435823	11.6051	7.11787
3437933	9.35855	5.80849
3439546	6.36626	1.35985
3442266	9.42315	5.32703
3442476	5.46667	3.97641
3444816	7.08454	4.21743
3445355	30.9306	9.05135
3446741	6.23129	2.63959
3448774	11.3485	7.92992
3449041	6.99428	3.66422
3450195	31.1815	-2.44576
3450256	7.00923	4.81519
3450518	10.941	6.33628
3451739	13.5976	5.60742
3456431	43.3174	9.21971
3457545	9.54185	3.26005
3458098	27.2607	2.93648
3459429	13.0471	1.25555
3460219	16.0248	5.82041
3460715	12.3309	3.55669
3464001	6.72606	1.75335
3464150	10.2818	4.96872
3464369	20.3608	4.85769
3464534	7.28534	6.57366
3464625	16.5177	7.42402
3465104	13.4763	0.752551
3465399	14.1438	-0.581802
3465557	14.3358	1.86469
3465575	16.5806	0.0305754
3465860	6.88015	3.60509
3468277	6.73411	5.79796
3470212	13.135	1.54959
3471252	25.2238	3.65697
3473584	7.86029	10.2186
3478137	8.83737	1.73845
3478184	8.02989	6.36943
3478190	18.8179	5.43367
3482046	13.2123	5.19704
3482718	12.5778	5.31191
3483534	12.2964	6.63193
3484055	7.72913	2.12615
3485012	7.89248	6.46184
3485925	12.6559	4.79516
3488668	9.69106	6.20524
3490037	13.1228	4.93825
3491285	10.836	5.1556
3503169	14.1632	6.52941
3503209	12.7246	5.12525
3503878	12.3241	4.35259
3503974	7.66522	2.32851
3506360	14.4649	5.55415
3506993	8.88191	1.60478
3509679	11.4263	3.68247
3510333	8.71847	7.35193
3511965	7.29994	-1.74404
3514114	9.42124	5.93679
3514754	11.089	7.13697
3518106	10.3411	4.53465
3520293	10.3263	3.97912
3522976	16.3061	8.70802
3523865	8.29452	1.82826
3524194	11.7925	4.47179
3524644	12.1201	4.11951
3528514	13.6432	1.41206
3528878	8.23813	3.62197
3529442	5.74631	0.75079
3531693	29.3201	0.908387
3531695	18.8407	4.59431
[truncated: 1,073 more rows]

## Sheet: All_E.coli_TCSs
TCS coordinate, bp	wt N3E, replicate 1	wt N3E, replicate 2	wt N3E, replicate 3	gyrA-S83L N3E, replicate 1	gyrA-S83L N3E, replicate 2	gyrA-S83L N3E, replicate 3
1256	0	0	0	0	7.2643	0
1441	0	0	0	0	14.528	0
1553	0	0	0	12.0662	8.29543	0
1905	0	12.1245	10.8824	23.6777	53.9424	7.70225
2303	0	0	7.50123	19.2221	24.3536	13.0925
2308	0	0	0	0	0	5.39089
2475	0	0	0	0	8.80762	0
3133	0	0	0	0	9.32732	0
3654	0	0	0	24.9563	29.5327	7.72057
3903	0	0	0	0	9.83214	0
3954	0	0	0	7.11808	0	0
4861	7.89961	7.17146	0	0	10.8514	9.29055
5488	0	0	0	7.13065	11.3897	0
5506	0	0	0	7.57663	7.24708	0
6306	0	0	0	13.4301	10.4003	0
8726	0	0	0	0	8.36659	0
9006	0	0	0	0	8.87849	0
9345	0	0	0	0	10.4174	0
9514	0	0	0	9.40477	0	0
9816	0	0	0	0	8.75549	0
10132	0	0	0	5.28287	0	0
10181	0	0	0	0	6.13574	0
10959	0	0	0	0	9.19538	0
11193	0	0	0	13.59	10.7109	5.34595
11269	0	0	0	12.7135	18.3638	15.2849
11408	0	7.60158	0	30.6965	27.5311	12.2273
13185	0	0	0	0	7.63667	0
13863	0	0	0	0	11.2195	0
14369	0	0	0	0	0	5.34662
14374	0	9.22898	0	0	15.8187	6.10981
14826	0	0	0	6.17337	11.2352	0
15380	0	6.48103	5.10775	13.2629	32.1825	0
15531	0	0	0	0	10.7298	0
16590	0	0	0	7.10351	10.2315	5.32488
16746	0	0	0	0	8.69174	0
17316	0	0	0	10.6653	13.2949	0
17321	0	0	0	5.33276	0	0
17328	0	0	0	14.6651	7.15806	0
17868	0	0	0	0	14.3006	0
18849	0	0	0	14.2262	27.5574	0
18850	0	0	0	0	7.14467	5.35614
18851	10.5669	9.7535	8.46128	45.3452	35.2145	9.94786
19077	0	0	0	10.2306	10.2121	0
20050	0	0	0	8.42903	0	0
20328	0	0	0	0	5.1042	0
20731	8.46468	15.6979	11.0597	31.0461	52.5331	14.5607
21130	0	0	0	0	5.1003	0
21919	0	0	0	0	7.15151	0
22555	0	0	0	0	10.2236	0
22556	0	0	0	12.4431	20.9575	0
22663	0	0	0	0	5.11127	0
24114	0	0	0	7.13608	21.0125	0
24865	0	0	6.28896	25.7761	32.6857	0
25448	0	0	0	11.5413	10.2036	0
26767	0	0	6.2323	17.673	30.9221	11.3716
26824	0	0	0	0	7.60427	0
26898	0	0	0	0	5.0709	0
27075	0	0	0	7.06922	11.1593	0
27158	0	0	0	0	9.63879	0
27390	0	0	0	0	12.172	0
27619	0	0	0	0	5.07497	0
27732	0	0	0	0	12.1745	0
28489	0	0	0	0	5.05692	0
28523	0	0	0	6.63266	15.166	0
28903	0	0	0	5.31067	12.6354	0
28958	0	0	0	8.41286	9.10072	0
28976	0	0	0	7.08625	0	0
29022	0	0	0	5.31393	0	0
29027	0	15.5332	10.2375	36.3118	38.935	20.4222
30567	0	0	7.70655	14.2537	25.8709	0
30703	0	0	0	10.2364	16.2341	0
31535	0	0	0	0	9.1452	0
33153	0	0	0	0	8.10933	0
33176	0	0	0	0	7.09238	0
33196	0	0	0	0	7.09402	0
33281	0	0	0	0	13.1732	0
33689	0	0	0	0	12.6577	0
33690	0	0	0	0	5.06321	0
35846	0	0	0	0	6.10584	0
37101	0	0	0	0	8.68471	0
37999	0	0	0	12.011	12.2772	0
38443	0	0	0	0	6.67119	0
38910	0	0	0	8.02677	0	0
39868	0	0	0	0	8.74255	0
40276	0	0	0	6.70192	11.8449	0
41109	0	0	0	0	8.78166	0
41488	0	0	0	0	7.22497	0
42627	0	0	0	10.3357	9.83193	0
43813	0	0	0	0	7.23367	0
44092	0	0	0	15.2684	19.127	0
44218	0	0	0	5.84348	5.17002	0
44247	0	0	0	14.8313	17.5864	0
44442	0	0	0	0	6.72929	0
45522	0	0	0	0	10.3608	5.30768
47398	0	0	5.15078	22.1637	19.281	9.12064
47761	0	0	0	0	8.34588	0
48860	0	0	0	5.42931	0	0
48895	0	0	0	0	10.9723	0
48932	0	0	0	9.04847	0	0
50612	0	0	0	0	7.82426	6.1092
50864	0	0	5.19489	13.5724	9.38503	0
51314	0	0	0	10.3923	13.5324	0
52405	0	0	0	10.8756	21.34	0
52810	0	0	0	0	8.3323	0
52959	0	0	0	0	0	7.68091
53105	0	0	0	0	6.77132	0
53324	0	0	0	0	5.7302	0
53376	0	0	0	0	7.29662	0
53440	0	0	0	15.8656	17.7192	0
53718	0	0	0	0	9.37506	0
53846	0	0	0	0	10.9397	0
53999	0	0	0	0	5.72771	0
54026	0	0	0	7.71259	13.0161	0
56205	0	0	0	5.45091	10.3644	0
57398	0	15.3012	6.7044	27.2141	40.3574	14.607
57468	0	0	0	0	6.21165	0
57507	0	0	0	0	5.69647	0
57793	0	0	0	0	6.21647	0
58219	0	0	0	0	7.76322	0
58814	0	0	0	0	6.71655	0
58820	0	0	0	0	12.9131	0
59418	0	0	0	6.80793	23.7422	0
60959	0	0	0	7.26575	0	0
61101	0	0	0	0	7.7527	0
61631	0	0	0	9.51916	12.9037	0
61737	0	0	0	0	11.3525	0
61860	0	0	0	8.60627	11.3404	0
61877	0	0	0	0	6.18565	0
61899	0	0	0	5.43305	7.21334	0
62036	0	0	0	11.7581	14.9297	0
62469	0	0	0	7.22626	7.72179	0
62694	0	0	0	10.3936	14.4223	0
62891	0	0	0	0	7.21892	0
64754	0	0	0	0	5.16335	0
64882	0	0	0	0	13.9423	0
66261	0	0	0	0	6.71279	0
69197	0	0	0	7.22311	0	0
70687	0	0	0	0	7.77428	0
71488	0	0	0	0	11.9394	0
72402	0	0	0	0	5.71545	0
73720	0	0	0	0	12.5218	0
73903	0	0	0	0	9.37628	0
74051	0	0	0	0	0	5.27203
74266	0	0	0	10.3964	7.28634	0
74465	0	0	0	9.93446	0	0
75712	0	0	0	0	8.8364	0
76549	0	0	0	10.8068	18.8052	0
77176	0	0	0	7.2156	0	0
80116	0	0	0	0	5.72746	0
81540	0	0	0	0	8.82399	0
84019	0	0	5.4627	0	0	0
84091	0	0	5.82982	0	0	0
84096	0	0	5.10195	0	0	0
87593	0	0	5.85851	15.8421	14.0483	5.26657
88585	0	0	0	7.71017	7.78857	0
89674	0	0	0	8.15144	0	0
90198	0	0	0	7.70985	12.9888	0
90980	0	0	0	7.24527	17.136	0
91454	0	0	0	6.78961	0	0
91663	0	0	0	7.69858	10.3883	7.56397
92054	0	0	0	0	5.1935	0
93666	0	0	0	0	6.73785	0
94001	0	0	0	14.5418	23.3586	0
95504	0	0	0	0	7.29836	0
96120	0	0	0	11.4161	19.2869	5.41454
96269	0	0	0	10.0394	0	0
97128	0	0	0	23.6548	12.9762	0
98010	0	0	0	18.1788	13.4664	0
99167	0	0	0	0	6.21352	0
100516	0	0	0	11.7603	0	0
101078	0	0	0	0	9.31587	0
101244	0	0	0	0	6.72581	0
101571	0	0	0	9.94564	13.4536	0
102264	0	0	0	6.33564	11.3976	0
103924	0	0	0	14.4453	15.944	0
106003	0	0	0	0	6.69968	0
107068	0	0	0	12.7068	10.8286	0
107904	0	0	0	0	7.74536	0
108554	0	0	0	10.0128	17.0113	0
108932	0	0	0	0	8.25267	0
109093	0	0	0	0	5.15482	0
109186	0	0	0	0	7.2138	0
109223	0	0	0	0	6.6994	0
110488	0	0	0	15.9359	15.4688	0
110623	0	0	0	0	6.19123	0
110969	0	8.79424	8.97991	11.8455	15.4804	9.2469
111689	0	0	0	0	10.8249	0
112061	0	0	0	7.2755	16.9989	0
112221	0	0	0	0	7.71897	0
112299	0	0	0	0	6.6882	0
112726	0	0	0	0	7.71534	0
113028	0	0	0	10.0007	13.3681	5.41729
113875	0	0	0	7.26696	0	0
115324	0	0	0	7.26636	6.66379	0
115908	0	0	0	6.34332	11.7414	0
116006	0	0	0	5.88691	5.10301	0
117883	0	0	0	6.34306	0	0
118316	0	0	0	8.60304	14.2584	0
118317	0	0	0	0	11.2031	0
118462	9.08402	17.1683	0	35.7616	50.3945	9.31894
119402	0	0	0	5.89848	0	0
120885	0	0	0	0	10.7295	0
121047	0	0	0	10.9274	11.7607	0
122167	0	0	0	0	7.66038	0
124945	0	0	0	0	7.7155	0
125247	0	0	0	0	7.18759	0
125292	0	0	0	0	11.2887	0
126543	0	0	0	0	6.66052	0
126555	0	0	0	0	8.70898	0
126672	0	0	0	13.2021	25.1184	0
127953	0	0	0	0	9.23349	0
128352	0	0	0	0	7.20515	0
129230	0	0	0	0	9.25722	0
129670	0	0	0	0	8.24399	0
129672	0	0	0	0	9.27509	0
129766	0	0	0	24.091	22.6768	0
130206	0	0	0	0	16.9949	0
131634	0	0	0	0	7.21179	0
132482	0	0	0	0	6.6829	0
132744	0	0	0	0	12.3255	0
133789	0	0	0	8.60771	8.77072	0
134230	0	0	0	0	5.1648	0
134770	0	0	0	0	7.74769	0
134772	0	0	0	0	8.77978	0
135293	0	0	0	0	9.83978	0
135859	0	0	0	0	8.8343	0
136929	0	0	0	10.0076	0	0
138219	0	0	0	34.2525	21.4576	8.41341
138573	0	0	0	0	7.84744	0
140847	0	0	0	0	7.29393	0
141651	0	0	0	0	5.71829	0
142327	0	0	0	0	5.19563	0
142835	0	0	0	5.42727	0	0
143913	0	0	0	8.11417	9.83765	0
144141	0	0	0	13.0603	8.27756	0
144298	0	0	0	8.10188	0	0
144704	0	0	0	0	7.75854	0
145248	0	0	0	11.237	16.0243	0
145250	0	0	0	7.641	13.9573	0
146620	0	0	0	6.75353	0	0
146913	0	0	0	17.9915	13.884	0
150281	0	0	0	0	7.16843	0
153097	0	0	0	7.26727	11.268	0
154482	0	0	0	19.101	11.7817	0
155317	0	0	0	21.966	21.5748	12.4136
157457	0	0	0	12.8219	18.984	0
159030	0	0	0	17.3956	18.4812	0
159303	0	0	0	8.68608	7.69293	0
160219	0	0	0	19.7161	11.3003	0
160489	0	0	0	7.80432	5.14488	0
161414	0	12.301	0	64.9237	53.6527	16.5133
162424	0	0	0	11.0902	11.9018	0
165573	0	0	0	5.58027	17.2362	0
166334	0	0	0	15.8003	5.23379	0
168361	0	0	0	5.56857	6.84015	0
168475	0	0	0	0	6.84465	0
170873	0	0	0	0	7.87936	0
171341	0	0	0	7.8681	0	0
171551	0	0	0	12.9631	5.7901	11.9001
171572	0	0	0	0	7.89542	0
172858	0	0	0	0	7.40085	0
174006	0	0	0	5.53741	7.94558	0
174058	0	0	0	15.6857	0	0
174686	0	0	0	8.75509	6.35016	0
177228	0	0	0	11.0828	8.49101	0
177539	0	0	0	0	5.32146	0
177678	0	0	0	15.2581	0	0
179232	0	0	0	10.1864	14.9077	0
179536	0	0	0	0	6.91806	6.99294
184148	0	0	0	0	6.83267	0
187510	0	0	0	7.83234	8.93014	0
188038	0	0	0	0	7.87988	0
188071	0	0	0	9.68965	6.82848	0
188206	0	0	0	0	7.34524	0
188800	0	0	0	5.52836	0	0
189805	0	0	0	6.92545	7.35198	0
190280	0	0	0	10.166	8.92858	0
190895	0	0	0	27.7402	23.6231	6.25627
191303	0	0	0	10.1515	14.6652	0
193459	0	0	0	0	5.22264	0
194082	0	0	0	0	8.36823	0
194299	0	0	0	0	5.7449	0
195175	0	0	0	5.06981	0	0
196074	0	0	0	0	9.85337	0
196647	0	0	0	0	6.74499	0
196683	0	0	0	8.2862	8.82132	0
197508	0	0	0	7.84317	5.7178	8.65875
198391	0	0	0	0	9.87427	0
198700	0	0	0	0	8.81884	0
200278	0	0	0	0	9.37608	0
200745	0	13.4476	0	31.4094	64.6398	0
200790	0	0	0	31.8754	41.7067	9.45958
201254	0	0	0	9.24397	15.6802	0
201827	0	0	0	0	9.43913	0
202178	0	0	0	0	10.5056	0
202535	0	0	0	8.3304	7.35729	0
202712	0	0	0	7.87364	18.9254	0
203904	0	0	0	0	10.5355	0
204749	0	0	0	0	8.94501	0
205155	0	0	0	8.34981	8.93894	0
206472	0	0	0	9.72814	9.41488	0
206633	0	0	0	0	8.37005	0
206654	0	0	0	0	5.75617	0
206807	0	0	0	0	8.37498	0
206888	0	0	0	0	18.8285	0
207821	0	0	0	0	9.40279	0
208142	0	0	0	5.10016	13.0455	0
209672	0	0	0	0	5.73356	0
210499	0	0	0	0	6.77558	0
211201	0	0	0	6.02462	0	0
211453	0	0	0	0	12.5701	0
211525	0	0	0	8.80729	13.6138	0
212075	0	0	0	0	10.4847	0
212726	0	0	0	25.0131	45.0863	16.478
212828	0	0	0	0	5.76257	0
212989	0	0	0	11.5717	5.76282	0
213160	0	0	0	6.47561	11.5241	0
214293	0	0	0	34.0467	20.3179	0
215179	0	0	0	0	10.3989	0
215234	0	0	0	0	12.4776	0
215708	0	0	0	0	9.33014	0
216915	0	0	0	0	15.4914	0
217329	0	0	0	0	9.27828	0
217871	0	0	0	0	6.67904	0
218062	0	0	0	0	12.3118	0
218322	0	0	0	0	9.73087	0
218816	0	0	0	16.5813	17.4027	0
219000	0	0	0	0	8.18395	0
219125	0	0	0	11.2006	6.65073	0
220066	0	0	0	13.4343	10.7245	0
222560	0	0	0	0	10.1702	0
222612	0	0	0	6.70952	8.1344	0
222840	0	0	0	20.1435	28.4812	0
222898	0	0	0	0	20.8568	0
223658	0	5.01143	0	10.302	22.3691	0
224344	0	0	0	8.07491	0	0
224698	0	0	0	14.7954	18.8044	0
225228	0	0	0	8.06857	0	0
225336	0	0	0	9.41956	18.8212	0
225730	0	0	0	0	9.164	0
228037	0	0	0	6.24638	0	0
228839	0	0	0	0	5.57082	0
229408	0	0	0	6.69186	11.6633	0
229502	0	0	0	6.24163	9.63512	0
229561	0	0	6.01556	12.9304	35.5023	0
229720	0	0	0	0	8.11516	0
229794	0	0	0	11.1494	18.76	0
229982	0	0	0	14.2636	40.5356	10.0732
230038	0	0	0	5.34832	7.09732	0
230265	12.7683	12.2661	9.36094	18.7237	31.417	13.1576
230527	0	0	0	0	15.7105	0
231070	0	0	0	0	6.08393	0
231174	0	0	0	5.79961	11.1485	0
231655	5.95711	8.93942	0	12.9664	15.2085	0
232395	0	0	0	0	8.606	0
232407	0	0	0	0	6.58092	0
232430	5.40118	0	0	0	12.6532	0
232531	0	0	0	0	5.06299	0
233163	0	0	0	0	11.6702	0
233523	0	0	0	0	14.194	0
233688	0	7.84379	7.18587	48.5438	37.5524	7.80692
234610	0	0	0	0	11.7173	0
235300	0	0	0	0	6.64648	0
235632	0	22.3726	12.4395	11.8143	15.3826	10.1252
235779	0	0	0	0	5.64281	0
236068	11.5122	20.1285	15.087	81.4287	81.4859	24.1693
236069	0	0	0	0	0	6.23708
236353	0	0	0	14.1179	26.6489	0
236790	0	0	0	0	9.20694	0
237869	0	0	0	0	6.68162	0
237959	0	0	0	5.97725	19.5434	0
240134	0	0	0	0	9.31687	0
240668	0	0	0	0	10.3394	0
241631	0	0	0	0	8.29077	0
241716	0	0	0	0	6.21728	0
242111	15.5158	17.3457	18.7779	99.2199	82.8095	11.7314
242715	0	10.0645	7.88653	34.8475	43.0474	7.82053
242756	0	0	0	0	5.18733	0
243551	0	0	0	7.88897	0	0
243721	0	0	0	0	7.26226	0
243892	0	0	0	0	8.29937	0
243964	0	9.53931	0	19.9476	37.3391	7.04155
244292	0	0	0	7.42222	0	0
244293	0	0	0	0	7.26949	0
244299	0	0	0	12.5253	5.1935	0
244551	0	0	0	21.3622	19.211	0
244640	0	0	0	6.49611	0	0
244641	0	0	0	18.0963	13.5051	0
244733	0	0	0	5.56904	0	0
246052	0	0	0	7.92032	9.86978	0
246713	0	0	0	20.5265	23.4321	5.49975
246927	0	0	0	7.46628	0	0
247196	0	0	0	0	6.78589	0
250137	0	0	0	30.8376	37.6472	7.14454
250281	0	0	0	7.47899	11.5153	0
250317	0	0	0	9.81893	5.23311	0
250452	0	0	0	7.47916	0	0
252183	0	0	0	7.46003	8.34497	0
252195	0	0	0	6.99468	6.25873	0
253391	0	0	0	8.85041	0	0
254132	0	0	0	0	8.39914	0
254585	0	0	0	13.5507	12.6103	0
255017	0	0	0	5.60152	6.31108	0
257062	0	0	0	7.07052	0	0
257100	0	0	0	0	9.53764	0
257843	0	0	0	0	8.47173	0
258118	0	0	0	5.18167	9.53532	0
259312	0	0	0	15.9679	12.7062	0
261145	0	0	0	5.6317	12.7199	0
261475	0	0	0	10.3154	6.88829	0
262083	0	0	0	0	5.29157	0
262297	0	0	0	8.92748	12.1878	0
262718	0	0	0	0	8.47771	0
265037	0	0	0	8.09168	6.98461	0
266065	0	0	0	11.4235	8.60395	0
266900	0	0	0	0	7.50426	0
267913	0	0	0	8.10537	0	0
268378	0	0	0	0	7.53537	0
268648	0	0	0	12.4627	7.53892	0
269058	0	0	0	7.18037	0	0
269187	0	0	0	20.1077	15.0266	0
269348	0	0	0	0	6.44185	0
270363	0	0	0	7.66295	0	0
271329	0	0	0	23.4709	13.4642	0
271707	0	0	0	6.71932	10.2537	0
271716	0	0	0	0	8.63566	0
271801	0	0	0	0	5.94196	0
273767	0	0	0	12.865	13.4431	0
274012	0	0	0	7.13127	0	0
274257	0	8.43184	0	43.659	28.3881	11.8266
372320	0	0	0	6.58499	9.50283	10.3339
372387	0	0	0	8.45963	7.38931	0
373229	0	0	0	7.99328	0	0
374913	0	0	0	0	6.30487	0
376312	0	0	0	35.3411	23.7529	12.7136
376832	0	0	0	6.12805	0	0
380912	0	0	0	7.02852	0	0
381111	0	0	0	5.15035	5.76937	0
381379	0	0	0	0	6.30377	0
382379	0	0	0	9.85376	0	0
383129	6.14109	10.6969	0	15.4976	18.4749	13.349
385053	0	0	0	0	5.8156	0
386202	0	0	0	8.3891	5.262	0
387137	0	0	0	9.33647	0	0
387525	0	0	0	0	6.35464	0
388545	0	0	0	7.47706	8.97806	0
388786	0	0	0	12.1476	0	0
390933	0	0	0	0	7.42767	0
391093	0	0	0	0	6.36685	0
391288	0	0	0	7.02488	0	0
392584	0	0	0	9.45819	0	0
394488	0	0	0	13.7362	9.14354	0
395152	0	0	0	28.0067	11.3104	0
395662	0	0	0	11.8491	9.12575	0
397850	0	0	0	0	8.55834	0
398280	0	0	0	5.63816	0	0
402266	0	0	0	0	5.34622	0
402693	0	0	0	16.4155	12.2949	0
403081	0	0	0	9.82868	0	0
403733	0	0	0	9.36186	0	0
404373	0	0	0	0	7.49589	0
404537	0	0	0	11.249	11.7711	0
405343	0	0	0	7.00281	9.62256	0
405687	0	0	0	0	7.48455	0
406668	0	0	0	8.42913	7.48888	0
408497	0	0	0	0	8.54806	0
408679	0	0	0	6.99934	11.764	0
409091	0	0	0	10.267	11.2281	0
409796	0	0	0	13.05	0	0
410262	0	0	0	8.84984	9.06598	0
412273	0	0	0	7.00265	9.05773	0
413611	0	0	0	7.96858	21.3005	7.03686
413771	0	0	0	0	7.98361	0
414055	0	0	0	11.2245	0	0
414984	0	0	0	0	7.44263	0
415476	0	0	0	9.33547	12.2413	0
416170	0	0	0	15.4284	0	0
417853	0	0	0	0	7.43358	0
419328	0	0	0	8.90491	15.4377	0
422170	0	0	0	0	10.5685	0
422913	0	0	0	7.00703	6.85848	0
423826	0	0	0	0	12.6749	0
423895	0	0	0	0	13.2001	0
424380	0	0	0	0	7.38574	0
424422	0	0	0	0	6.33035	0
424860	0	0	0	0	8.96662	0
425680	0	0	0	0	5.81099	0
426547	0	0	0	0	5.296	0
426939	0	0	0	16.4503	9.55429	0
427286	0	0	0	8.46293	14.3226	0
427454	0	0	0	17.8611	9.54627	0
428273	0	0	0	0	8.48876	0
428313	0	0	0	9.89508	0	0
428537	0	0	0	8.48905	12.2123	0
428850	0	5.71789	0	0	10.6187	0
428851	0	0	0	7.07529	0	0
428856	0	0	5.79196	8.96203	0	0
429408	0	0	0	14.6331	11.1504	0
429948	0	0	0	21.7216	15.3781	0
431315	0	0	0	0	13.742	0
431648	0	0	0	7.07021	5.27078	0
433103	0	0	0	6.58014	0	0
433328	0	0	0	0	7.89248	0
433747	0	0	0	0	5.25901	0
433780	0	0	0	9.3821	13.142	0
433843	0	10.2584	7.72107	16.4183	21.0282	0
434173	0	0	0	17.8368	12.6205	0
435069	0	0	0	0	7.37682	0
435628	0	0	0	9.88477	6.32563	0
435630	0	0	0	0	11.5975	0
436067	0	0	0	0	15.8314	0
436223	0	0	0	7.05611	7.9112	0
436723	0	0	0	7.06116	0	0
436806	0	0	0	11.7701	10.5689	0
436827	0	0	0	16.9516	17.9656	6.38878
436935	0	0	0	14.6035	10.0507	0
437089	0	9.78812	11.3462	40.082	47.1354	13.5577
437141	0	0	0	0	6.3559	0
437258	0	13.2502	9.39119	19.3362	39.1869	8.75911
437293	0	0	0	0	8.47528	0
437675	0	0	0	0	9.0237	0
437676	0	0	0	0	9.5545	0
438051	0	0	0	7.06883	12.7579	0
438597	0	0	0	0	6.9222	0
438707	0	0	0	0	7.98485	0
440238	0	0	0	0	7.46245	0
441469	0	0	0	0	8.55929	0
442608	0	0	0	0	7.50778	0
442859	0	0	0	5.67281	0	0
443094	0	0	0	0	19.3014	0
443391	0	0	0	0	11.2677	0
443436	0	0	0	6.13993	11.8056	0
444599	0	0	0	5.66306	11.2642	0
444678	0	0	0	0	6.43624	0
445134	0	0	0	7.06208	16.5962	0
445430	0	0	0	0	5.3523	0
445766	0	0	0	0	10.7072	0
446185	0	0	0	0	5.88242	0
446260	0	0	0	0	6.9538	0
446437	0	0	0	0	7.48788	0
446986	0	8.09929	0	17.3956	44.8643	0
447698	0	0	0	0	7.48521	0
447832	0	0	0	0	14.4403	0
447838	0	0	0	0	10.697	0
447844	0	0	0	0	5.88307	0
447850	0	0	0	8.46293	24.5992	0
447999	0	0	0	0	10.1635	0
449202	0	0	0	0	17.619	0
449217	0	0	0	0	9.07605	0
449493	0	0	0	0	7.47107	0
449612	0	0	0	7.05504	10.668	0
449961	0	0	0	5.18302	10.1443	0
449967	0	0	0	0	8.54198	0
449973	0	0	0	8.95269	18.6856	0
450318	0	0	0	0	7.47273	0
450360	0	0	0	0	14.9498	0
451809	0	0	0	0	9.09161	0
452040	0	0	0	18.3746	13.3739	0
454383	0	0	0	9.41121	9.6408	0
456148	0	0	0	9.41304	17.6555	0
456217	0	0	0	11.7765	15.5123	0
456382	0	0	0	8.48536	8.55662	0
457047	0	0	0	6.59514	10.6642	0
457396	0	0	0	0	15.4706	0
458243	0	0	0	0	10.1366	0
458791	0	0	0	9.9123	15.9817	0
459251	0	0	0	11.8073	0	0
460286	0	0	0	26.582	22.9016	8.85691
462992	0	0	0	0	6.94576	0
463280	0	0	0	13.3783	10.1547	0
463370	0	0	0	9.55527	6.41276	0
463486	0	0	0	6.69104	0	0
463928	0	0	0	5.25505	0	0
464918	0	0	5.08494	0	0	0
465186	0	0	0	8.61017	0	0
468805	0	0	0	0	5.8781	0
470448	0	0	0	20.0092	8.53401	0
470554	0	0	0	0	9.59543	0
471941	0	0	0	0	8.00419	0
472787	0	0	0	0	6.96373	0
473182	0	0	0	0	9.6365	0
473632	0	0	0	0	10.1889	0
474324	0	0	0	10.5489	21.4207	0
475775	0	0	0	0	5.32359	0
476212	0	0	0	0	7.97548	0
476740	0	0	0	17.1248	14.3587	0
478096	0	0	9.36687	10.9348	27.6532	0
478290	0	0	0	11.4133	11.7015	0
478316	0	0	0	0	7.44642	0
479456	0	0	0	0	5.84338	0
480539	0	0	0	0	9.02629	0
481038	0	7.54446	0	13.204	22.807	0
481968	0	0	0	9.4409	10.1184	0
483582	0	0	0	0	8.45905	0
483967	0	0	0	9.89594	13.7469	0
485903	0	0	0	6.12167	13.192	0
488389	0	0	0	6.12619	0	0
488785	0	0	0	10.8401	13.7499	0
489196	0	0	0	0	5.28016	0
489734	0	0	0	10.8372	15.8632	0
491378	0	0	0	0	5.82085	0
491567	0	0	0	5.18933	11.1241	0
491654	0	0	0	0	7.41505	0
492754	0	0	0	8.95424	17.4918	5.65473
493475	0	0	0	0	5.30044	0
493763	0	0	0	16.4918	10.0515	0
494248	0	0	0	7.53223	10.5745	0
494923	0	0	0	8.45651	0	0
495891	0	0	0	7.55322	20.7643	0
496776	0	0	0	10.8615	14.9044	0
497050	0	0	0	6.61655	0	5.62879
497533	0	0	0	7.56589	10.0918	0
497559	0	0	0	0	7.96754	0
497577	0	0	0	5.67553	7.96719	0
498055	0	0	0	0	5.84791	0
498275	0	0	0	17.0192	15.9439	0
498608	0	0	0	0	5.84674	0
499012	0	0	0	12.7847	10.6321	0
499101	0	0	0	6.15588	0	0
500322	0	0	0	7.60952	6.92235	0
500559	0	0	0	5.23637	0	0
501030	0	0	0	0	5.32489	0
504257	0	0	0	0	9.67944	0
504299	0	0	0	8.54666	12.369	0
504998	0	0	5.8376	16.1384	0	0
505319	0	0	0	24.6693	26.909	0
505907	0	7.50948	0	32.7651	19.3954	10.47
505908	0	0	0	10.4468	0	0
507399	0	0	0	8.55096	0	0
507698	0	0	0	5.23028	0	0
509690	0	0	0	7.16014	0	0
512110	0	0	0	11.4752	14.0658	0
512180	0	0	0	8.12824	11.3537	0
512209	0	0	0	0	7.02895	0
512272	0	0	0	0	5.4081	0
514421	0	0	0	9.63484	16.8299	0
514508	0	0	0	9.15676	0	0
517541	0	0	0	6.7992	0	0
517605	0	0	0	16.0335	10.892	0
517650	0	0	0	23.8111	17.4181	7.35707
517844	0	0	0	0	7.61369	0
518069	0	0	0	6.31199	7.0721	0
518130	0	0	0	7.76704	12.5051	0
521515	0	0	0	0	0	5.70504
521780	0	0	0	8.70772	0	0
523566	0	0	0	5.32494	0	0
530423	0	0	0	10.1554	11.3539	0
532800	0	0	0	16.9083	22.6432	0
533387	0	0	0	9.17123	13.4539	0
535212	0	0	0	8.15972	14.0333	0
536454	0	0	0	0	6.99024	0
537134	0	0	0	0	5.93168	0
537590	0	0	0	0	7.53706	0
539561	0	8.61825	0	67.0396	45.6119	13.5907
541709	0	0	0	7.24657	0	0
542926	0	0	0	0	7.07482	0
545241	0	0	0	8.21882	19.0584	0
547770	0	0	0	11.1492	0	0
549593	0	0	0	7.72968	8.05376	0
550317	0	0	0	6.76799	11.3137	0
553985	0	0	0	11.0801	0	0
555108	0	0	0	0	10.7612	0
556756	0	0	0	0	10.7525	0
557029	0	0	0	24.1101	25.8165	0
558357	0	0	0	0	8.04494	0
561267	0	0	0	5.71015	0	0
564123	0	0	0	13.2893	10.1014	0
564150	0	7.56166	0	63.5792	49.4458	16.0021
564155	0	0	0	7.59188	0	0
566432	0	0	0	0	5.33032	0
567092	0	0	0	6.65308	0	0
568654	0	0	0	6.18708	0	0
570094	0	0	0	8.55508	0	0
571592	0	0	0	9.47824	0	0
571832	0	0	0	0	7.45964	0
573692	0	0	0	0	5.85854	0
574402	0	0	0	13.2498	10.6467	0
574892	0	0	0	44.8765	37.2181	13.5435
580448	0	0	0	6.63332	12.8127	0
581158	0	0	0	10.8907	12.8181	0
581354	0	0	0	10.9119	9.62384	0
585318	0	0	0	0	7.96719	0
585340	0	0	0	0	7.4367	0
585604	0	0	0	5.19532	0	0
585679	0	0	0	5.19793	0	0
586095	0	0	0	23.6692	30.3035	0
588160	0	0	0	0	6.91193	0
591408	0	0	0	9.56665	11.9027	0
594327	0	0	0	12.4424	0	0
594908	0	0	0	0	7.64607	0
595290	0	0	0	0	10.9158	0
597076	0	0	0	11.0494	12.6202	0
598371	0	0	0	0	8.24471	0
600271	0	0	0	5.78001	7.16789	0
600387	0	0	0	7.22694	0	0
601978	0	0	0	0	6.077	0
605283	0	0	0	7.2448	0	0
605731	0	0	0	5.79468	5.51047	0
605732	0	0	0	19.3164	17.6351	0
606194	0	0	0	0	9.3706	0
606310	0	0	0	6.77781	5.5168	0
607374	0	0	0	0	6.629	0
615550	0	0	0	9.75157	0	0
616767	0	0	0	0	6.58853	0
617057	0	0	0	10.7178	0	0
621968	0	0	0	0	8.2754	0
625682	0	0	0	18.5138	14.905	0
626662	0	0	0	17.9798	8.80383	0
627389	0	0	0	0	7.16345	0
629331	0	0	0	5.33769	0	0
633837	0	0	0	7.27965	0	0
634215	0	0	0	0	13.0695	0
634491	0	0	0	12.5798	10.3408	0
634976	0	0	0	5.31889	0	0
637387	0	0	0	18.9038	15.2866	0
638800	0	0	0	7.2909	0	0
639524	0	0	0	5.82567	7.63132	0
639961	0	0	0	0	7.07835	0
640353	0	0	0	10.159	0	0
640697	0	0	0	0	5.98002	0
642971	0	0	0	28.0401	9.78792	0
643864	0	0	0	6.27519	0	0
644956	0	0	0	10.6806	0	0
645392	0	0	0	5.37073	0	0
645656	0	0	0	7.81162	0	0
646023	0	0	0	0	5.50896	0
648056	0	0	0	0	5.15359	0
654569	0	0	0	5.04064	0	0
654814	0	0	0	19.1304	14.9491	0
659140	0	8.18908	5.49618	45.9852	55.0115	6.0665
659712	0	0	0	0	5.20434	0
659842	0	0	0	0	6.35398	0
660218	0	0	0	9.10722	13.3054	0
660705	0	0	0	11.1453	0	0
660706	0	0	0	5.57215	6.37114	0
661228	0	0	0	5.58284	13.3537	0
661394	0	0	0	0	6.38099	0
661548	0	0	0	0	5.80679	0
661699	0	0	0	12.1827	8.71377	0
661769	0	0	0	14.2159	17.4309	0
662012	0	0	0	30.4334	26.6841	0
665190	0	0	0	0	5.14733	0
665296	0	0	0	13.0562	21.7011	0
665462	0	0	0	8.5194	10.821	0
666335	0	0	0	5.00309	0	0
666514	0	0	5.41262	17.0211	30.6809	0
666593	0	0	0	0	6.24493	0
667182	0	0	0	22.2603	35.9509	0
667440	0	0	0	0	5.02445	0
668303	0	0	0	0	11.0341	0
668723	0	7.82994	8.08609	20.3789	18.2168	6.66009
669384	0	0	0	0	9.92637	0
669656	0	0	0	0	7.71909	0
670466	0	0	7.26089	11.1375	25.866	0
672353	0	0	0	0	5.51465	0
673282	0	0	0	5.81942	8.85414	0
673487	0	0	0	10.1797	12.7243	0
673830	0	0	0	5.82137	0	0
674968	0	0	0	9.74741	12.7599	0
675631	0	0	0	0	13.3159	0
676752	0	0	0	7.28535	0	0
680541	0	0	0	8.21681	7.18985	0
681371	0	0	0	19.3799	17.1965	0
682228	0	0	0	0	6.67166	0
683446	0	0	0	7.7414	7.22813	0
683773	0	0	0	11.6316	10.0082	0
685232	0	0	0	8.73382	10.0235	0
686054	0	0	0	5.81591	0	0
686059	0	0	0	40.2285	34.0127	16.5535
686336	0	0	0	8.72894	13.3786	0
686996	0	0	0	0	6.1171	0
687407	0	0	0	8.70054	11.0868	0
687765	0	8.99473	0	21.7334	30.4621	16.4949
687766	0	0	0	11.1057	23.8164	0
688751	0	0	0	10.6587	11.0674	0
688883	0	0	0	13.5577	22.1486	0
689983	0	0	0	11.1534	13.307	0
690473	0	14.3368	9.5628	57.2051	47.7274	17.2874
693030	0	0	0	0	11.0438	0
693681	0	0	0	11.6134	7.71449	0
694228	0	0	0	0	6.05916	0
695311	0	0	0	7.72211	0	0
695664	0	0	0	7.23465	0	0
697196	0	0	0	16.9336	20.9163	0
697235	0	0	0	0	5.50403	0
697691	0	0	0	5.31771	0	0
698729	0	0	0	6.29775	0	0
700196	0	0	0	0	7.63253	0
701870	0	0	0	34.9954	43.2094	0
702372	0	0	0	5.74962	7.00435	0
702477	0	0	0	6.2267	8.08194	0
703284	0	0	0	0	7.53436	0
703785	0	0	0	7.6665	7.00624	0
705143	0	0	0	0	9.15522	0
706170	0	0	0	7.6599	14.0147	0
706445	0	0	0	6.22615	0	0
707794	0	0	0	7.64859	10.2263	0
709138	0	0	0	5.74683	8.67817	0
709460	0	0	0	0	6.52381	0
709710	0	0	0	0	8.1531	0
709716	0	10.0319	13.4899	82.9637	42.9523	16.3622
709951	0	0	0	0	5.97988	0
710190	0	0	0	43.1393	40.2338	0
711115	0	0	0	6.24199	0	0
711236	0	0	0	9.12554	11.4226	0
711485	0	0	0	0	11.9652	0
711757	0	0	0	28.3297	19.6003	0
711763	0	0	0	11.0445	25.0442	5.73399
713217	0	0	0	6.27101	12.0041	0
713442	0	0	0	15.4631	12.0139	0
713760	0	0	0	8.70927	13.1296	0
714970	0	0	0	13.5553	12.0536	0
716281	0	0	0	0	9.34208	0
716381	0	0	0	40.3529	39.5647	0
716386	0	0	0	0	13.738	0
716391	0	0	0	0	10.4397	0
716676	0	0	0	9.70967	0	0
717608	0	0	0	0	9.88755	0
717789	0	0	0	0	6.59728	0
718666	0	0	0	6.79677	7.70918	0
719636	0	0	0	11.6993	12.751	0
720032	0	0	0	8.30414	0	0
721129	0	0	0	5.84608	7.2161	0
721480	0	0	0	7.30695	0	0
721544	0	0	0	13.1552	11.1002	0
728492	0	0	0	6.83963	11.1644	0
732782	0	0	0	0	17.2671	0
733881	0	0	0	5.3183	0	0
740370	0	0	0	8.70383	6.7055	0
741593	0	0	0	10.1576	8.39672	0
743119	0	0	0	5.34451	0	0
746162	0	0	0	7.26096	7.87678	0
746406	0	0	0	16.9491	10.1316	0
746871	0	0	0	5.32126	0	0
751607	0	0	0	0	5.65089	0
753137	0	0	0	12.1583	9.58825	0
755577	0	0	0	0	10.6497	0
756824	0	0	0	5.32126	7.81236	0
757040	0	0	0	0	7.80565	0
757279	0	0	0	7.25045	10.5936	0
758372	0	0	0	5.32043	10.0233	0
759064	0	0	6.54721	20.8296	13.3935	0
759343	0	0	0	7.27346	0	0
761023	0	0	0	20.3666	17.3633	0
764928	0	0	0	15.0554	16.2838	0
765102	0	0	0	12.6206	15.7252	0
766645	0	0	0	5.3451	6.19035	0
767029	0	0	0	16.529	7.32514	0
767632	0	0	0	0	5.07446	0
770078	0	7.86744	0	0	10.6577	0
770912	0	0	0	27.8822	14.6413	5.94009
771641	0	0	0	10.7262	8.98961	0
773793	0	0	0	0	8.363	0
774680	0	14.4576	16.2666	38.5317	40.8022	7.54885
774681	0	0	0	0	6.14814	0
774686	0	12.651	14.642	32.1947	24.596	7.54905
774687	0	0	0	5.85265	0	0
774815	0	0	0	0	7.26547	0
774854	0	0	7.72358	0	10.0639	0
775805	0	0	0	15.5878	0	0
775893	0	0	8.4811	15.5812	13.3861	0
775895	0	0	0	6.32942	0	0
776395	0	0	0	8.75457	0	0
777096	0	0	0	6.32374	0	0
777139	17.1736	49.6474	62.1875	50.0889	89.4441	6.66682
779555	0	0	0	0	8.87602	0
779591	0	5.99459	0	0	7.21094	0
779611	0	0	0	5.77847	0	0
779902	0	0	0	0	7.77101	0
780249	0	0	6.44542	12.0862	15.5683	0
780877	0	0	0	0	6.12434	0
781291	0	0	0	7.25109	12.8019	0
781363	0	10.8169	16.6172	0	0	0
782164	0	0	0	0	8.3535	0
782264	0	0	0	0	5.01454	0
782453	0	0	0	0	10.0342	0
782757	0	0	0	0	11.703	0
782855	0	0	0	0	6.13059	0
782979	0	0	0	0	8.35854	0
783078	0	0	0	0	8.35854	0
783187	0	0	0	0	5.5721	0
783343	0	0	0	0	15.0401	0
783368	0	0	0	7.26194	0	0
783373	0	0	0	0	5.01419	0
783432	0	0	0	8.71219	0	0
783481	0	0	0	0	5.57507	0
783763	0	0	0	0	6.71519	0
783841	0	0	0	0	8.40887	0
784015	0	17.4954	9.76388	7.3122	17.9649	5.01849
784527	0	0	0	6.82074	12.3437	0
784769	0	0	0	8.28586	7.28701	0
785128	0	0	0	9.76914	12.3515	0
785406	0	0	0	8.35873	6.20605	0
785720	0	0	0	0	7.39173	0
786360	0	0	0	7.49564	0	0
786722	0	0	0	7.49012	13.7708	0
786866	0	0	0	8.48529	0	0
787616	0	0	0	6.9744	5.15556	0
787887	0	0	0	7.97808	5.15986	0
788141	0	0	0	10.9666	0	0
788318	0	0	0	8.48216	0	0
790224	0	0	0	7.48099	9.15954	0
791276	0	0	0	8.47223	0	0
791447	0	0	0	13.9732	14.8549	0
791607	0	9.89009	7.03731	10.9931	16.0215	0
791658	0	0	0	0	11.4453	0
792651	0	0	0	0	11.4966	0
793122	0	0	0	11.5422	14.4183	0
793156	0	0	0	11.0425	0	0
793263	0	0	0	12.554	0	0
793268	0	0	0	5.52327	0	0
807737	0	0	0	12.0723	0	0
808351	0	0	0	8.55319	0	0
810017	0	0	0	11.0335	10.879	0
810174	0	0	0	9.52432	14.8772	0
810974	0	0	0	6.00828	0	0
811465	0	0	0	12.5054	13.1955	0
814421	0	0	0	0	6.30349	0
816449	0	0	0	11.4685	8.05858	0
816871	0	0	0	7.97771	10.9359	0
817875	0	0	0	12.9471	16.0775	0
820066	0	0	0	12.157	24.2606	0
820689	0	0	0	0	6.77581	0
821045	0	0	0	5.36626	0	0
821141	0	0	0	8.78431	0	0
821715	0	0	0	6.3498	8.48873	0
821804	0	0	0	0	5.09348	0
822006	0	0	0	0	5.65835	0
823058	0	0	0	9.28612	8.51219	0
823715	0	0	0	0	5.1113	0
823834	0	0	0	0	6.24907	0
823916	0	6.64298	0	7.31713	7.95204	0
823955	0	0	0	18.0441	24.4218	0
824015	0	0	0	15.6071	6.2467	0
824206	0	0	0	0	5.11299	0
824635	0	0	0	0	7.39191	0
824968	0	0	0	10.2498	0	0
825250	0	0	0	25.3678	14.2368	0
825551	0	0	0	6.82979	0	0
825584	0	0	0	8.78214	7.97259	0
826002	0	18.7566	8.15245	49.2731	45.5696	11.6813
827462	0	0	0	9.75596	13.6709	0
828691	0	0	0	9.28194	12.5316	0
828980	0	0	0	6.83563	0	0
830108	0	0	0	8.29033	0	0
830784	0	0	0	0	7.43716	0
831689	0	0	0	7.84393	9.7499	0
833255	0	0	0	8.85323	0	0
833261	0	0	0	23.1121	26.413	0
834152	0	0	0	6.87027	0	0
834386	0	7.91129	8.15379	85.4766	105.37	15.1185
834387	0	0	0	8.3521	12.0262	0
834855	0	0	0	0	5.72771	0
834918	0	0	0	0	8.01249	0
834958	0	0	0	15.7309	20.0312	0
835129	0	0	0	6.87758	17.7263	0
835549	0	0	0	7.85849	0	0
836379	0	0	0	7.36917	0	0
836434	0	0	0	5.89614	0	0
836481	0	0	0	9.83135	14.2968	0
836817	0	0	0	0	7.43627	0
836878	0	0	0	7.87418	12.5809	0
837303	0	0	0	9.35038	0	0
837730	0	0	0	11.8081	9.72343	0
838638	0	13.4528	7.39301	105.54	83.529	9.31654
838709	0	0	0	7.89244	0	0
839335	0	0	0	13.8011	0	0
839432	0	0	0	9.86309	0	0
841677	0	0	0	7.79863	0	0
842909	0	0	0	10.2481	0	0
843024	0	0	0	0	7.89695	0
843877	0	0	0	0	5.08293	0
844884	0	0	0	0	8.4628	0
845887	0	0	0	14.1261	20.3874	5.07682
846268	0	0	0	8.27452	10.7788	0
846546	0	0	0	0	10.2255	0
846548	5.57856	11.0494	7.74683	106.23	48.8517	12.6625
846612	0	0	0	15.102	13.0678	0
846872	0	0	0	12.1969	8.52388	0
846981	0	0	0	0	7.38526	0
847314	0	0	0	24.8615	17.6098	0
848072	0	0	0	35.034	40.874	0
848378	0	0	0	0	9.64601	0
849278	0	0	0	8.27656	0	0
849323	0	0	0	13.1434	19.874	0
850094	0	0	0	0	5.67842	0
850173	0	0	0	5.852	0	0
850805	0	0	0	8.29424	6.23756	0
851057	0	0	0	0	5.09336	0
851446	0	0	0	7.30236	11.8814	0
851522	0	0	0	11.6801	0	0
851524	0	0	0	10.707	8.48993	0
852782	0	0	0	5.82959	5.64147	0
853020	0	0	0	6.80499	9.59117	0
853044	0	0	0	18.4728	10.7216	0
853084	0	0	0	32.0915	16.9288	5.06712
853724	0	0	0	0	5.09276	0
854514	0	0	0	13.1139	0	0
854786	0	0	0	36.4194	22.1025	0
857098	0	0	0	11.1389	9.61285	0
857902	0	0	0	8.7083	6.2062	0
858010	0	0	0	10.1629	5.07673	0
858649	0	0	0	0	6.19296	0
859479	0	0	0	9.65457	0	0
859905	0	0	0	0	7.3193	0
859998	0	0	0	18.8781	11.8285	0
860523	0	0	0	24.7652	24.8517	0
861322	0	0	0	0	11.3483	0
861578	0	0	0	9.71794	5.67761	0
861921	0	0	0	21.413	43.7745	0
862704	0	0	0	0	8.53316	0
862797	0	0	0	11.1854	10.8007	0
863609	0	0	0	0	5.69404	0
863655	0	0	0	0	6.26359	0
863657	0	0	0	6.8238	0	0
863670	0	0	0	0	6.26507	0
864728	0	0	0	16.5606	11.4162	0
864872	0	0	0	29.2022	27.4067	0
865227	0	0	0	38.8857	26.7696	0
865259	0	0	0	16.526	20.498	0
866912	0	0	0	0	6.21789	0
867095	0	0	0	6.79555	8.49713	0
869251	0	0	0	5.80722	0	0
869308	0	0	0	0	7.94584	0
869435	0	0	0	7.74054	7.38264	0
869581	0	0	0	9.67848	0	0
869606	0	0	0	10.1644	0	0
870071	0	0	0	8.70189	7.38299	0
870514	0	0	0	7.25756	0	0
871665	0	0	0	5.3359	8.54531	0
872384	0	0	0	18.4006	17.6687	0
872827	0	0	0	7.75472	0	0
872908	0	0	0	0	8.57113	0
873074	0	0	0	11.1412	13.1574	0
873214	0	0	0	0	8.00906	0
873243	0	0	0	7.75178	10.2959	0
873286	0	0	0	12.6014	16.0116	0
877493	0	0	0	5.86201	7.55577	0
878457	0	0	0	15.1661	0	0
878591	0	0	0	0	9.33102	0
879003	0	0	0	5.382	7.5833	0
879299	0	0	0	0	6.41664	0
880055	0	0	0	8.79837	8.15514	0
881163	0	0	0	0	8.7455	0
881317	0	0	0	6.33867	0	0
882297	0	5.53276	0	21.4626	18.0547	0
882384	5.49663	0	0	18.0392	30.2678	0
882504	0	0	0	27.7845	15.7217	0
883229	0	0	0	0	5.81734	0
883621	0	0	0	9.26379	11.0556	5.0502
883630	0	0	0	0	9.89283	0
884256	0	0	0	0	8.72876	0
884415	0	0	0	0	5.24743	0
884784	0	0	0	6.3508	6.99487	0
884860	0	0	0	29.7959	35.5598	0
885707	0	0	0	5.37327	0	0
885888	0	0	0	8.30807	0	0
885929	0	0	0	0	11.6765	0
886911	0	0	0	0	6.42631	0
887171	0	0	0	0	5.24806	0
888726	0	0	0	6.87291	16.431	0
889761	0	0	0	0	7.63859	0
890166	0	0	0	7.36817	11.7571	0
891777	0	0	0	0	7.04187	0
892168	0	0	0	7.37451	16.4306	0
892262	0	0	0	16.7152	14.6677	0
892433	0	0	0	37.8567	42.8527	0
892960	0	0	0	62.4829	68.5694	11.8007
893171	0	0	0	7.88259	7.03259	0
893538	0	0	0	0	7.61697	0
893557	0	0	0	0	7.03122	0
893761	0	0	0	7.39984	7.04204	0
894023	0	0	0	0	9.3816	0
895329	0	0	0	0	8.75336	0
895573	0	0	0	0	10.4966	0
895870	0	0	0	8.35192	0	0
895915	0	0	0	5.40235	0	0
896347	0	0	0	0	10.4765	0
896398	0	0	0	5.89387	0	0
896400	0	7.33486	0	93.3175	32.0101	11.838
896402	0	0	0	21.1187	20.9526	5.91869
896403	0	0	0	5.89387	0	0
896464	0	0	0	13.7536	0	0
896576	0	0	0	11.7867	11.6257	0
897007	0	0	0	15.7148	18.0024	0
897148	0	0	0	8.836	11.0382	0
897175	0	0	0	0	5.22788	0
897187	0	0	0	22.0855	17.4221	0
898093	0	0	0	7.87043	0	0
898467	0	0	0	0	8.13088	0
898493	0	0	0	12.7732	9.8756	0
898619	0	0	0	9.33576	9.87083	0
898941	0	0	0	6.38676	8.1358	0
899202	0	0	5.38366	17.2134	22.686	0
899291	0	0	0	10.3358	9.31293	0
899592	0	0	0	7.88796	8.7455	0
899960	0	0	0	23.6816	25.641	0
900296	0	0	0	7.90125	11.6677	0
901137	0	0	0	7.9144	11.0572	0
902123	0	0	0	10.8828	14.5801	0
902664	0	0	0	9.40135	10.5012	0
903149	0	0	0	15.3629	23.4066	0
903701	0	0	0	0	7.6001	0
904959	0	0	0	7.93975	0	0
906312	0	0	0	14.915	16.4479	0
907487	0	0	0	7.94393	9.38779	0
909534	0	0	0	6.45134	0	0
911947	0	0	0	51.9454	21.5377	0
913259	0	0	0	8.91102	5.24895	0
915093	0	0	0	0	6.42303	0
915225	0	0	0	8.9314	0	0
915481	0	0	0	12.4033	25.1424	0
915573	0	0	0	12.3911	10.5258	0
917144	0	0	0	0	8.79697	0
917959	0	0	0	25.3114	26.9879	0
918486	0	0	0	18.3506	14.6573	0
918790	0	0	0	5.95781	0	0
918795	0	0	0	5.46133	0	0
918966	0	0	0	0	7.03448	0
919470	0	7.99157	0	26.2171	38.0042	0
919475	0	0	0	0	0	5.12458
919536	0	0	0	10.3917	16.9656	0
920973	0	0	0	10.3971	11.1638	0
921663	0	0	0	7.42432	0	0
922066	0	0	0	10.8808	12.3402	0
922444	0	0	0	5.44264	0	0
924809	0	0	0	5.42445	8.17437	0
925482	0	0	0	7.8946	12.272	0
925634	0	0	0	0	9.93617	0
926025	0	0	0	8.90086	9.93834	0
926096	0	0	0	0	5.26237	0
926097	0	0	0	15.3383	31.5765	0
926211	0	0	0	8.91509	7.60472	0
926412	0	0	0	14.3668	11.1097	0
926511	0	0	0	25.77	24.004	0
926615	0	0	0	7.93176	9.95337	0
926777	7.40384	17.267	15.3008	76.3136	55.6041	7.68666
926862	0	0	0	11.8887	10.5381	0
926905	0	0	0	5.94461	0	0
926996	0	0	0	0	12.8783	0
927356	0	0	0	19.8621	22.2862	0
928028	0	0	0	0	6.46057	0
928399	0	0	0	0	12.3368	0
928408	0	0	0	7.9383	0	0
928505	0	0	0	0	6.46294	0
928558	0	0	0	18.3548	18.805	0
928588	0	0	0	8.4327	8.81375	0
928879	0	0	0	7.93303	12.3405	0
928920	0	0	0	0	6.46215	0
929152	0	6.15178	0	0	18.811	0
929238	0	0	0	0	9.98868	0
929531	0	0	0	6.45046	9.98306	0
929637	0	0	0	0	5.87124	0
929673	0	0	0	6.45592	12.9174	0
929916	0	0	0	0	8.81354	0
929959	0	0	0	0	5.28722	0
930030	0	0	0	10.9177	9.39743	0
930779	0	0	0	7.44726	15.303	0
930780	0	0	0	0	7.65132	0
930886	0	0	0	0	11.7762	0
930951	0	0	0	0	7.06587	0
932509	0	0	0	0	12.9291	0
932723	0	0	0	12.4149	18.212	0
933898	0	0	0	24.8675	10.5633	0
934626	0	0	0	0	9.42047	0
934938	0	0	0	0	7.07593	0
935493	0	0	0	8.9774	7.65788	0
936645	0	0	0	0	7.07263	0
936714	0	0	6.66265	0	23.565	0
936890	8.54304	17.3505	18.3236	0	34.1718	5.13695
936943	0	0	0	0	5.30382	0
937500	0	0	0	0	17.6504	0
937778	6.14535	0	0	7.47086	30.6098	0
938445	0	0	0	5.98191	10.6222	0
938478	0	0	0	8.97369	17.7016	0
938709	0	12.947	12.4414	30.9286	55.4744	0
938710	0	0	0	9.97672	9.4413	0
938876	0	0	0	0	10.0395	0
939022	0	0	0	0	5.31504	0
939407	0	0	0	0	9.46618	0
939527	0	0	0	0	8.87061	0
939539	0	0	0	0	10.0499	0
939588	0	8.62149	0	0	0	0
939589	5.7951	0	0	0	10.0484	0
939756	0	0	6.62509	0	12.9958	0
940342	0	7.38659	0	13.4584	8.8547	0
940508	0	0	0	0	5.30943	0
940659	0	0	5.373	0	0	0
940973	0	0	0	0	7.66033	0
941064	0	9.21699	7.02171	17.9292	23.5691	0
941750	0	0	5.35793	0	0	0
941822	0	0	0	6.46806	0	0
942020	0	0	0	6.96465	11.1715	0
942239	0	0	0	6.95906	14.1034	0
942289	0	6.15663	8.26852	34.2864	33.5029	0
942494	0	0	0	7.44863	7.64438	0
942644	9.44145	9.24246	16.5568	41.6884	27.6333	0
942824	0	0	7.45287	0	9.99479	0
942926	0	0	0	0	7.05394	0
943207	0	0	0	0	9.98672	0
943565	0	11.7028	0	13.8584	25.8455	0
943659	0	0	0	0	7.64233	0
943769	0	0	7.45447	11.3772	18.8041	5.94588
944257	0	0	0	6.92889	8.23968	0
944293	0	0	5.38649	0	0	0
944752	0	9.22789	0	0	0	0
944796	0	0	0	12.8483	22.3594	0
945291	0	0	7.43795	18.282	17.0495	0
945764	0	0	0	14.3256	0	0
945814	9.78573	12.3138	10.7358	68.628	65.8384	0
945945	0	0	0	0	7.6369	0
946424	0	8.59098	8.63787	0	11.7511	0
946965	0	0	0	0	11.1543	0
947509	0	0	0	0	7.03088	0
947514	0	0	0	6.88694	9.95992	0
947519	0	0	0	0	8.78688	0
947926	7.72875	15.9573	16.0478	53.6173	70.8636	0
948016	0	7.98362	0	0	0	0
948017	0	14.7397	9.46973	5.41252	15.811	0
948020	0	7.36932	0	0	0	0
948278	0	0	0	7.87382	0	0
948339	0	0	0	11.8172	11.7136	0
948385	0	0	0	0	8.19769	0
948442	0	0	0	0	9.9524	0
948481	0	0	0	8.85484	11.7067	0
948582	6.04266	19.715	18.9769	0	7.02317	0
949043	0	0	0	0	12.8862	0
950070	0	0	0	10.8228	21.7321	0
950179	0	0	0	15.7462	12.9227	0
950233	0	0	0	0	10.5693	0
951066	0	0	0	6.89319	13.4864	0
951239	0	0	8.23807	20.206	33.4293	0
951240	0	17.9103	18.5343	61.1178	73.8945	11.868
951241	0	0	0	8.37886	16.421	0
951285	0	0	0	17.7475	11.1455	0
951589	0	8.63994	0	9.36312	9.97379	0
951736	0	0	0	7.38707	6.45111	0
951900	8.68016	0	14.8699	15.7519	25.2137	0
952309	0	7.40807	0	0	8.80901	0
952438	0	0	0	17.2244	18.805	0
952644	0	0	0	6.89648	8.2312	0
952655	0	0	0	0	5.29162	0
952667	0	0	0	11.332	9.40732	0
952770	0	0	0	0	7.05618	0
952934	0	0	0	0	7.05705	0
953558	0	0	0	5.91194	9.9833	0
953922	0	0	0	0	12.8943	0
954068	0	0	0	9.35972	17.5742	0
954069	0	0	0	0	5.27251	0
955698	0	0	0	8.79777	0	0
958231	0	0	0	9.31993	0	0
958991	0	0	0	0	5.22737	0
962215	0	0	0	0	6.39799	0
962230	0	0	0	12.3314	12.795	0
962351	0	0	0	0	7.56419	0
963206	0	0	0	6.42708	0	0
963499	0	0	0	11.3772	12.8417	0
963599	0	0	0	0	8.17219	0
965307	0	0	0	0	7.03328	0
965491	0	0	0	5.95086	12.323	0
966135	0	0	0	9.90723	22.2905	0
966274	0	0	0	0	9.97038	0
966814	0	0	10.0021	36.718	55.7577	0
966846	0	0	0	8.43328	0	0
966981	0	0	0	13.8838	20.5433	0
967245	0	8.1029	0	57.0656	92.1604	8.58327
967387	0	0	0	7.44385	11.1504	0
967926	0	0	0	0	9.97257	0
968244	0	0	0	0	10.5726	0
968376	0	0	0	0	9.39789	0
968799	0	0	0	0	8.22275	0
968800	0	8.08997	0	22.3045	22.3178	5.15213
969531	7.07824	10.5819	7.50774	45.6243	49.2233	0
970825	0	0	0	0	11.1252	0
971042	0	0	0	0	10.5427	0
971054	0	0	0	11.908	16.4002	0
971754	0	0	0	0	7.60584	0
971768	0	0	0	7.43297	0	0
971820	0	0	0	7.92923	16.3874	0
972491	0	0	0	0	8.77126	0
973109	0	0	0	6.4325	9.35078	0
973762	0	0	0	9.90475	8.78345	0
974658	0	0	0	9.90542	13.4867	0
974690	0	0	0	5.94583	8.80062	0
976264	0	0	0	19.873	13.4509	0
977213	0	0	0	13.4186	7.023	0
977247	0	0	0	0	5.26917	0
977536	0	0	0	10.4309	14.0398	0
977677	0	0	0	14.3997	0	0
977678	0	0	0	9.4332	0	0
978811	0	0	0	7.41552	0	0
979150	0	0	0	8.3945	14.002	0
979894	0	0	0	0	5.24297	0
979984	0	0	0	0	12.8118	0
980277	0	0	0	7.88473	11.058	0
980893	0	0	0	6.40111	6.38824	0
981013	0	0	0	6.40286	7.54609	0
981037	0	0	0	5.41497	0	0
981733	0	0	0	7.87489	8.70703	0
982309	0	0	0	12.2897	9.86868	0
984045	0	0	0	31.0447	18.5916	0
984342	0	0	0	0	9.28794	0
984391	0	0	0	8.37677	9.28346	0
985195	0	0	0	29.0717	27.2767	0
985280	0	0	0	0	11.0252	0
985691	0	0	0	0	9.85605	0
986209	0	0	0	25.14	31.3863	0
988242	0	0	0	0	7.59363	0
988496	0	0	0	8.42673	15.7737	0
989359	0	0	0	7.45597	9.37793	0
989422	0	0	0	8.95311	0	0
989575	0	0	0	7.45767	0	0
990087	0	0	0	5.46796	0	0
993652	0	0	0	0	10.6191	0
995275	0	0	0	13.9748	0	0
998488	0	0	0	10.0173	0	0
998657	0	0	0	8.52531	9.52225	0
998695	0	0	0	12.5442	0	0
998879	0	0	0	18.5607	0	0
1002579	0	0	0	8.03775	11.9437	0
1004082	0	0	0	6.02455	0	0
1005036	0	0	0	12.5785	10.1352	0
1005853	0	0	0	0	12.5128	0
1006460	0	0	0	7.54448	11.889	0
1006884	0	0	0	5.02453	0	0
1007807	0	0	0	7.0197	0	0
1007812	7.37131	18.8357	9.59531	106.807	108.795	7.73168
1008770	0	0	0	27.956	24.8616	0
1009086	0	0	0	0	10.0635	0
1009364	0	0	0	18.9401	9.46432	0
1009955	0	0	0	0	7.10489	0
1010614	0	0	0	0	14.2133	0
1010922	0	11.9579	0	19.4162	23.6736	0
1010982	0	0	0	0	5.32932	0
1011376	0	0	0	15.415	14.8033	0
1011612	0	0	0	6.96545	0	6.03751
1012530	0	0	0	7.95012	10.6626	0
1012632	0	5.03525	0	0	0	0
1014006	0	0	0	7.44437	11.2466	0
1014307	0	0	0	0	13.6187	0
1014464	0	0	0	6.94728	0	0
1014880	0	0	0	7.94411	15.4053	0
1015512	0	0	0	6.45046	14.8168	0
1015873	0	0	0	14.8734	28.4042	0
1016190	0	0	0	5.94312	0	0
1017114	0	0	0	0	12.4222	0
1017588	0	0	0	16.3182	23.6573	0
1017953	0	0	0	7.9126	14.2126	0
1018428	0	0	0	0	7.11155	0
1018494	0	0	0	9.89955	14.2235	0
1018801	0	8.19024	7.13563	0	15.4061	0
1018838	0	0	0	8.90248	15.9943	0
1019572	0	0	0	0	5.32224	0
1019576	0	0	0	0	5.32263	0
1020343	5.40555	8.18441	9.2047	9.40264	35.5218	7.79469
1021769	0	0	0	0	8.31219	0
1022014	0	0	0	30.289	15.4602	0
1022081	0	0	0	11.4173	8.91827	0
1023248	0	0	0	13.3882	7.73587	0
1023692	0	0	0	6.94315	7.73932	0
1023798	0	0	0	0	7.74162	0
1023971	0	0	0	0	7.74354	0
1025773	0	0	0	22.2669	46.3991	0
1026269	0	0	0	6.93364	5.95628	0
1026349	0	0	0	16.8488	11.32	0
1026695	0	0	0	0	10.1367	0
1026728	0	0	0	0	6.56053	0
1027789	0	0	0	7.44385	0	0
1028220	0	0	0	0	9.5516	0
1028599	0	0	0	5.96313	7.16994	0
1029296	0	0	0	27.8829	37.675	0
1030612	0	0	0	11.9734	15.5896	0
1030613	0	0	0	0	16.1883	0
1033018	0	0	0	28.9525	29.4222	0
1034799	0	0	0	17.4625	9.01242	0
1036038	0	0	0	5.49579	0	0
1037996	0	0	0	5.49896	0	0
1039279	0	0	0	6.50642	0	0
1041108	0	0	0	6.00537	10.7721	0
1041927	0	0	0	69.7634	29.3737	8.71919
1042825	0	0	0	0	7.19212	0
1044086	0	0	0	17.5379	29.2721	0
1044691	0	0	0	6.00842	13.7455	0
1046004	0	0	0	9.53776	6.55792	0
1046248	0	0	0	15.0614	14.9084	0
1046516	0	0	0	15.0502	18.481	0
1046702	0	0	0	9.53997	8.94018	0
1049003	0	0	0	12.0706	18.4929	0
1049222	0	0	0	7.03923	0	0
1049224	0	0	0	7.03923	8.35329	0
1049706	0	0	0	18.1135	10.7362	0
1051552	0	0	0	0	5.3359	0
1053184	0	0	0	8.53794	0	0
1053349	0	0	0	0	5.32998	0
1054387	0	0	0	5.5348	0	0
1054470	0	0	0	23.6536	20.7436	0
1055086	0	0	0	6.03965	0	0
1056170	0	0	0	9.54439	16.0271	0
1056366	0	0	0	6.51649	11.2716	0
1056434	0	0	0	8.52137	8.90086	0
1056956	0	0	0	7.00804	0	0
1057215	0	0	0	10.0092	9.47482	0
1058752	0	0	0	14.0404	12.4834	0
1059645	0	0	0	5.51255	0	0
1060068	0	0	0	58.0934	51.1631	0
1060401	0	0	0	0	5.34977	0
1060977	0	0	0	8.01196	9.53264	0
1061134	0	0	0	31.0234	11.32	0
1061293	0	0	0	5.50264	13.1116	0
1062781	0	0	0	0	10.1244	0
1062800	0	0	0	12.0091	0	0
1062842	0	0	0	5.0047	13.6893	0
1063220	0	0	0	8.024	0	0
1063222	0	0	0	5.01477	7.75701	0
1063819	0	0	0	7.03613	0	0
1065000	0	0	0	7.04396	8.94995	0
1068262	0	0	0	5.51472	8.39458	0
1069673	0	0	0	10.0228	0	0
1071847	0	0	0	5.01164	0	0
1075781	0	0	0	6.01814	0	0
1076149	0	0	0	8.52669	0	0
1076816	0	0	0	14.0667	10.7895	0
1079119	0	0	0	0	5.38469	0
1080856	0	0	0	6.97793	6.56999	0
1081142	0	0	0	8.97472	0	0
1082149	0	0	0	8.45882	10.1186	0
1083128	0	0	0	12.4235	17.8781	0
1083217	0	0	0	19.3766	0	0
1085696	0	0	0	28.7277	27.9114	0
1086804	0	0	0	29.3672	18.4755	0
1087653	0	6.28452	0	48.2484	58.2228	10.226
1087715	0	0	0	0	7.1265	0
1088392	0	0	0	10.4045	14.8359	0
1089505	0	0	0	0	5.86952	0
1090987	0	0	0	0	7.09492	0
1090988	0	0	0	19.206	21.8776	0
1092798	0	0	0	0	5.31295	0
1098499	0	0	0	12.6885	11.7039	0
1099932	0	0	0	0	6.46231	0
1100441	0	0	0	14.2364	11.7373	0
1100741	0	0	0	8.35135	0	0
1100891	0	0	0	11.7941	9.38801	0
1101219	0	0	0	7.37368	0	0
1101458	0	0	0	8.3504	8.2306	0
1101660	0	0	0	18.6872	16.4753	0
1101750	0	0	0	6.88194	0	0
1101869	0	0	0	0	8.81613	0
1102151	0	8.10118	0	56.0032	66.4099	11.1064
1102156	0	0	0	14.7387	0	0
1102522	0	0	0	13.2702	8.80062	0
1107174	0	0	0	0	7.63093	0
1107442	0	0	0	0	7.0479	0
1107641	0	0	0	0	7.05152	0
1109472	0	0	0	7.97203	0	0
1109765	0	0	0	16.9169	15.4602	0
1111196	0	0	0	9.91788	5.91739	0
1112485	0	0	0	0	12.9981	0
1113418	0	0	0	7.42009	8.24271	0
1114202	0	0	0	0	12.9487	0
1114461	0	0	0	7.44232	0	0
1114640	0	0	0	5.45983	0	0
1114716	0	0	5.00769	0	14.1366	0
1114749	0	0	0	6.9441	0	0
1115178	0	0	0	0	7.6592	0
1115236	0	0	0	0	10.6035	0
1115985	0	0	0	0	8.81742	0
1116294	0	0	0	0	7.64569	0
1116306	0	0	0	17.796	25.8733	0
1116358	0	0	0	0	7.05981	0
1116874	0	0	0	0	8.25019	0
1117365	0	0	0	10.4724	8.30091	0
1117400	0	0	0	0	10.6781	0
1117643	10.3403	17.1211	12.2721	79.9756	92.773	0
1117748	0	0	0	0	7.74546	0
1117843	0	8.2664	8.07325	59.7075	31.6287	7.93161
1117882	0	0	0	5.01883	13.1302	0
1117904	0	0	0	9.03661	7.16317	0
1118084	0	0	0	6.53264	0	0
1118206	0	0	0	14.07	12.5514	0
1118272	0	0	0	8.54605	14.3417	0
1118502	0	0	0	12.0726	15.5418	0
1118938	0	0	0	11.0542	10.1678	0
1119014	0	0	0	14.0661	12.559	0
1119994	0	0	0	0	8.37743	0
1120575	0	0	0	0	7.18567	0
1121130	0	0	0	0	9.57779	0
1121214	0	0	0	9.04457	0	0
1121256	0	0	0	9.04939	0	0
1121637	0	0	0	8.54704	19.7448	0
1122680	0	0	0	10.5772	16.2082	0
1123241	0	0	0	8.55994	7.20435	0
1124802	0	0	0	6.55344	0	0
1124898	0	0	0	5.54354	0	0
1125399	11.2002	36.3259	30.8284	146.406	117.185	23.0313
1125720	0	0	0	8.0791	10.8068	0
1126338	0	0	0	13.6452	12.0202	0
1130863	0	0	0	13.1258	13.8239	0
1138868	0	0	0	6.06596	0	0
1139411	0	0	0	0	7.21806	0
1139640	0	0	0	0	5.41246	0
1139987	0	0	0	7.05755	0	0
1140878	0	0	0	0	7.20831	0
1141102	0	0	0	5.03959	0	0
1141369	0	0	0	11.5841	13.8211	0
1141469	0	0	0	6.5507	0	0
1143247	0	0	0	11.0688	11.9893	0
1143347	0	0	7.32324	19.1207	20.3858	0
1145761	0	0	0	7.00497	10.1224	0
1149483	0	0	0	14.0557	11.3428	0
1150060	0	0	0	0	7.77788	0
1151935	0	0	0	5.53763	0	0
1152561	0	0	0	5.03877	0	0
1152576	0	0	0	0	7.78758	0
1154223	0	0	0	5.54599	7.22585	0
1154315	0	0	0	6.04638	13.2414	0
1155956	7.32249	9.65664	9.56292	15.571	40.2565	5.36163
1157381	0	0	0	12.0964	0	0
1157387	0	0	0	5.04005	0	0
1157529	0	0	0	28.7123	19.8646	0
1158290	0	0	0	8.08871	7.84354	0
1158763	0	0	0	8.59405	8.45028	0
1158859	0	0	0	5.05768	0	0
1160502	0	0	0	7.12461	6.07777	0
1160553	0	0	0	9.67252	13.9813	0
1161296	0	0	0	9.17851	0	0
1163131	0	0	8.26655	0	9.74045	0
1163311	0	7.1055	0	8.67778	0	0
1164280	0	15.4965	13.5065	27.0868	18.8956	0
1164624	0	0	0	6.6538	0	0
1164777	0	15.4701	9.56148	12.3008	18.3028	0
1166465	0	0	5.23847	0	0	0
1166904	0	0	0	8.23339	10.4158	0
1167617	0	0	6.94423	8.73968	7.97232	0
1170473	0	0	0	0	6.72127	0
1171093	0	0	0	11.268	19.5882	0
1172231	0	0	0	0	5.4967	0
1173674	0	0	0	6.11887	6.08578	0
1173791	0	6.39031	0	7.13616	17.0294	0
1174257	0	0	0	5.10469	9.72714	0
1177069	0	10.225	9.88286	26.412	13.3528	0
1177111	0	0	0	8.63612	0	0
1177450	0	0	0	8.12944	0	0
1177465	0	0	0	7.11243	10.9306	0
1178875	0	0	0	6.60254	0	0
1179645	0	8.29602	8.594	7.09481	0	0
1179646	0	7.01988	10.7396	0	11.4737	0
1179827	0	0	6.01088	0	7.2411	0
1180632	0	0	0	0	9.04274	0
1181245	0	0	0	8.07516	10.8396	0
1182623	0	0	0	5.05733	0	0
1182915	0	0	0	9.60444	0	0
1183437	0	0	0	0	6.65691	0
1184004	0	0	0	0	12.7469	0
1185477	0	0	0	0	8.52895	0
1187183	0	0	0	5.04873	12.1595	0
1190212	0	0	0	10.6957	16.0442	0
1191080	0	7.06782	0	25.9612	25.8617	0
1191775	0	0	0	7.13331	12.9438	0
1191854	0	0	5.60277	16.3005	27.0995	0
1193463	0	0	0	7.62796	10.4376	0
1195637	0	0	0	9.17291	7.97354	0
1197524	0	0	0	0	6.71392	0
1197859	0	5.16826	0	17.7346	12.8165	0
1198726	0	0	0	6.07233	7.30515	0
1217021	0	0	0	0	6.05983	0
1217085	0	0	0	5.07341	0	0
1217927	0	0	0	7.12528	9.70601	0
1221825	0	0	0	6.11441	0	0
1223750	0	0	0	5.05391	0	0
1224743	0	0	0	8.54308	16.2835	0
1226348	0	0	0	11.0073	0	0
1227004	0	0	0	17.0297	13.8871	0
1227543	0	0	0	8.5257	0	0
1231386	0	0	0	7.57363	7.30664	0
1234151	0	0	0	7.63763	0	0
1235982	0	0	0	5.09941	0	0
1238281	0	0	0	9.65643	8.00605	0
1239292	0	0	0	10.6872	11.6925	0
1239887	0	0	0	0	9.24676	0
1242096	0	0	0	15.2534	7.39665	0
1242414	0	0	0	5.59292	0	0
1244334	0	0	0	14.3238	8.02705	0
1244533	0	10.458	9.64856	39.3571	16.0628	7.28587
1244904	0	0	0	7.66444	11.1155	0
1253268	0	0	0	5.64278	0	0
1253561	0	0	0	8.20905	0	0
1255342	0	0	0	0	8.04545	0
1257156	0	0	0	6.13675	0	0
1259629	0	0	0	0	9.80357	0
1259630	0	0	0	7.68417	8.57856	0
1260872	0	0	0	15.3386	18.3611	0
1260881	0	0	0	8.6925	8.56851	0
1260935	0	0	0	8.17906	0	0
1261181	0	0	0	0	9.1775	0
1261669	0	0	0	0	9.77589	0
1261896	0	0	0	7.67402	0	0
1263018	0	0	0	10.2318	10.3795	0
1263141	0	0	0	7.67366	12.8256	0
1264038	0	0	0	0	12.2183	0
1264288	0	0	0	15.8469	12.8393	0
1264390	0	0	0	7.66606	0	0
1265056	0	0	0	15.3386	7.31257	0
1265131	0	0	0	7.66859	0	0
1265961	0	0	0	11.2354	15.8298	0
1266193	0	0	0	5.62098	0	0
1267421	0	0	0	8.65923	7.30682	0
1267836	0	0	0	6.10638	5.48095	0
1268172	0	0	0	15.7944	16.4687	0
1268268	0	0	0	0	5.48749	0
1268535	0	0	0	5.09379	0	0
1268987	0	0	0	5.08447	10.3458	0
1270857	0	0	0	5.10614	0	0
1273785	0	0	0	6.64643	0	0
1276266	0	0	0	8.18195	11.0122	0
1276758	0	0	0	7.66299	9.17914	0
1277169	0	0	0	0	7.35512	0
1280834	0	0	0	8.74943	7.98312	0
1282542	0	0	0	18.49	13.5058	0
1285505	0	0	0	20.5766	17.8099	0
1287954	0	0	0	13.3095	17.0882	0
1289047	0	0	0	11.2637	0	0
1289244	0	0	0	8.18871	0	0
1291114	0	0	0	19.4221	10.9928	0
1292165	0	0	0	6.12304	9.15674	0
1292833	0	0	0	0	13.3938	0
1295281	0	0	0	8.56093	10.8764	0
1296317	0	7.21742	5.17333	25.1255	15.7119	0
1296965	0	0	0	7.54361	7.85755	0
1297708	0	0	0	6.04231	0	0
1297774	0	0	0	0	13.3202	0
1298465	0	0	0	11.5913	13.3464	0
1298897	0	0	0	7.05739	0	0
1299423	0	0	0	0	6.07623	0
1302589	0	0	0	5.04486	0	0
1304440	0	0	0	13.5984	16.5507	0
1304959	0	0	0	8.05398	0	0
1306114	0	0	0	0	12.9222	0
1307367	0	0	0	7.55938	20.9453	0
1307798	0	0	0	0	20.9089	0
1307799	0	5.25397	0	0	0	0
1307951	0	0	0	0	12.9084	0
1307993	0	0	0	5.03164	0	0
1308035	10.5817	20.3672	29.1629	0	60.863	5.49393
1308060	0	0	0	0	6.76204	0
1308260	0	10.4988	11.7496	15.0855	44.8708	0
1308290	0	0	0	0	9.22238	0
1308952	0	0	0	0	7.37564	0
1309100	0	6.56064	0	0	0	0
1309808	7.69887	9.18127	6.51707	18.0921	36.1987	0
1310681	0	0	0	7.57663	10.4713	0
1310682	0	7.21546	0	17.6788	12.9352	0
1310820	0	9.83246	0	13.1359	16.642	0
1311254	0	0	0	8.61091	14.8417	0
1311271	0	0	0	7.09018	8.04028	0
1312328	0	0	7.85236	0	0	0
1313054	0	0	0	6.14733	8.73003	0
1313787	0	0	0	5.11517	0	0
1314420	0	0	0	0	14.3169	0
1314718	0	0	0	5.64866	11.835	0
1315257	0	0	0	0	6.86251	0
1315827	0	6.59587	0	0	11.8636	0
1317035	0	0	0	7.73164	0	0
1318365	0	0	0	6.18399	0	0
1318467	0	0	0	15.4497	7.45983	0
1319646	0	0	0	5.64599	9.94567	0
1321041	0	0	0	7.68907	0	0
1321269	0	0	0	5.12726	0	0
1321400	0	0	0	5.13272	0	0
1321897	0	0	0	8.71716	9.28441	0
1322482	0	7.2569	0	23.0579	14.2416	0
1322719	0	0	0	8.71654	10.5348	0
1322724	0	0	0	8.71654	0	0
1322729	0	0	0	11.281	0	0
1323478	0	0	0	8.72892	8.04981	0
1325423	0	0	0	8.22149	9.27844	0
1325735	0	0	0	7.21037	0	0
1326048	0	0	0	7.72668	13.6344	0
1326050	0	0	0	5.15075	0	0
1326348	0	0	0	0	10.5473	0
1327047	0	0	0	9.80319	0	0
1327083	0	0	0	7.22203	11.1436	0
1328544	0	0	0	0	5.58894	0
1331334	0	0	0	13.3555	9.86245	0
1331354	0	0	0	6.67696	0	0
1331555	0	0	0	22.5866	14.1635	0
1331693	0	0	11.0041	63.6472	48.6671	0
1332998	0	0	0	0	8.00359	0
1333578	0	0	0	6.18047	0	0
1335749	0	0	0	7.2037	0	0
1336219	0	0	0	19.5585	10.4853	0
1336851	0	0	0	5.13454	9.24273	0
1338695	0	0	0	14.3594	18.4518	0
1340391	0	0	0	7.69707	12.8777	0
1341092	0	0	6.18617	16.4014	14.7162	0
1344289	0	0	0	0	9.29232	0
1346584	0	0	0	0	7.40254	0
1347031	0	0	0	9.26872	5.55976	0
1349092	0	0	0	10.8341	10.5088	0
1350182	0	0	0	6.71032	8.0287	0
1351556	0	0	0	0	7.43865	0
1352756	0	0	0	8.25571	0	0
1353420	0	0	0	9.77947	8.02849	0
1353851	0	0	0	7.1921	7.40634	0
1355274	0	0	0	9.25027	9.2489	0
1356761	0	0	0	15.4534	12.9668	0
1357742	0	0	0	15.4949	14.2072	0
1358797	0	0	0	21.6919	15.443	0
1358799	0	0	0	0	6.1764	0
1361023	0	0	0	8.79345	0	0
1361123	0	0	0	9.30516	0	0
1364272	0	0	0	7.16732	0	0
1364803	0	0	0	9.19906	7.3239	0
1365329	0	0	0	8.17617	9.15628	0
1366265	0	0	0	32.2119	10.3948	0
1366440	0	0	0	11.2523	7.94614	0
1368813	0	0	0	7.65578	0	0
1372626	0	0	0	28.6274	15.3498	0
1372673	0	0	0	11.7635	0	0
1375830	0	0	0	8.20691	0	0
1376089	0	0	0	0	6.77261	0
1376917	0	0	0	6.1395	6.14589	0
1380288	0	0	0	19.4358	9.88656	0
1381847	0	0	0	8.19296	0	0
1381866	0	0	0	8.1918	0	0
1382728	0	0	0	7.69762	6.1912	0
1384055	0	0	0	10.8174	9.30167	0
1386223	0	0	0	0	7.45211	0
1387134	0	0	0	5.6727	0	0
1388168	0	0	0	7.22306	0	0
1392481	0	0	0	24.7154	18.6583	0
1396381	0	0	0	23.7583	24.4202	0
1396698	0	0	0	12.4087	12.5287	0
1398991	0	0	0	59.3634	41.2522	16.0072
1399481	0	0	0	13.4242	13.7586	5.64456
1400295	0	0	0	6.70968	0	0
1400678	0	0	0	0	9.98858	0
1401302	0	0	0	0	8.74342	0
1404168	0	0	0	8.22344	0	0
1406126	0	0	0	7.71972	0	0
1406155	0	0	0	5.66072	8.73933	0
1407151	0	0	0	14.8983	0	0
1407624	0	0	0	0	5.6043	0
1409499	0	0	0	9.76695	0	0
1409880	0	0	0	10.7795	17.4352	0
1413530	0	0	0	6.16802	5.5619	0
1414587	0	0	0	6.15839	0	0
1418955	0	0	0	6.14995	12.9445	0
1420269	0	0	0	25.1218	22.1666	0
1421326	0	0	0	17.4595	12.3347	0
1422362	0	0	0	15.9507	13.5445	6.48059
1429847	0	0	0	11.769	0	0
1430134	0	0	0	14.8554	0	0
1431024	0	0	0	13.8596	0	0
1431988	0	0	0	14.9258	20.3832	0
1432753	0	0	0	8.21915	6.78967	0
1434822	0	0	0	7.18512	6.1737	0
1435127	0	0	0	14.8698	0	0
1435669	0	0	0	9.22252	10.4969	0
1436703	0	0	0	10.753	11.0793	0
1437587	0	0	0	0	6.16704	0
1441294	0	0	0	0	6.1585	0
1441887	0	0	0	31.3541	16.0475	0
1442524	0	0	0	6.6738	0	0
1443230	0	0	0	12.3296	0	0
1443394	0	0	0	0	7.41683	0
1444447	0	0	0	0	5.56964	0
1445172	0	0	0	0	7.42581	0
1446812	0	0	0	0	6.22232	0
1447491	0	0	0	5.15725	0	0
1454933	0	0	0	0	5.06486	0
1455499	0	0	0	6.2907	0	0
1456876	0	0	0	23.5912	8.24039	0
1457653	0	0	0	7.84309	0	0
1458049	0	0	0	10.969	5.06994	0
1465336	0	0	0	11.8094	15.4672	0
1465398	0	0	0	13.352	0	0
1466703	0	0	0	6.15504	0	0
1469648	0	0	0	5.10013	0	0
1471444	0	0	0	5.07484	8.52635	0
1472730	0	0	0	8.10306	7.29923	0
1480220	0	0	0	12.1003	0	0
1482102	0	0	0	10.2388	0	0
1486651	0	0	0	14.3784	8.08986	0
1487938	0	0	0	20.5372	16.8299	0
1490308	0	0	0	11.3379	0	0
1492864	0	0	0	0	5.60111	0
1493224	0	0	0	6.18399	0	0
1499307	0	0	0	7.16563	8.64295	0
1499655	0	0	0	0	7.41492	0
1500483	0	0	0	15.9359	9.28657	0
1500806	0	0	0	7.71789	0	0
1501545	0	0	0	12.3533	13.0378	0
1502339	0	0	0	0	8.02519	0
1506280	0	0	0	10.2684	0	0
1506568	0	0	0	20.0446	0	0
1506896	0	0	0	19.5399	9.89751	0
1510522	0	0	0	11.28	11.0697	0
1511316	0	0	0	21.0501	20.3601	0
1512937	0	0	0	10.823	0	0
1513732	0	0	0	0	5.58519	0
1514400	0	0	0	7.20781	0	0
1516323	0	0	0	10.2844	0	0
1517262	0	0	0	15.939	14.9611	0
1522278	0	0	0	9.23212	11.8071	0
1527610	0	0	0	7.63279	0	0
1529194	0	0	0	5.59725	0	0
1529433	0	0	0	6.10853	0	0
1529581	0	0	0	6.62286	0	0
1532456	0	0	0	7.6405	0	0
1541658	0	0	0	0	8.03717	0
1542482	0	0	0	12.32	11.1344	0
1544067	0	0	0	12.373	0	0
1554257	0	0	0	7.75412	0	0
1559622	0	0	0	14.4327	0	0
1561766	0	0	0	5.15823	0	0
1561786	0	0	0	10.8307	0	0
1564929	0	0	0	21.4569	16.7111	0
1566490	0	0	0	9.71355	0	0
1566736	0	0	0	8.68718	0	0
1567570	0	0	0	7.14876	0	0
1567583	0	0	0	13.7846	0	0
1567918	0	0	0	0	9.27199	6.48492
1568940	0	0	0	7.12043	0	0
1569678	0	0	0	10.1606	9.24415	0
1569684	0	0	0	12.7002	12.9385	0
1572719	0	0	0	7.534	0	0
1573698	0	0	0	0	7.92517	0
1581641	0	0	0	10.9497	11.4824	0
1582866	0	0	0	5.9529	0	0
1590701	0	0	0	6.63142	0	0
1593364	0	0	0	5.11855	0	0
1593625	0	0	5.22072	0	0	0
1593639	0	0	6.09099	0	0	0
1593641	0	0	0	0	6.79823	0
1593642	0	7.79052	8.26635	0	0	8.24783
1593643	0	18.1774	10.0059	67.643	19.7757	30.242
1593644	0	12.9842	6.09099	23.0607	17.9212	20.1607
1593645	0	6.49194	7.83088	12.8115	10.5053	10.0801
1593646	22.1308	73.3572	49.5943	276.728	187.246	112.71
1593647	0	10.3876	13.0508	54.3258	24.7183	21.9922
1593648	0	0	0	13.3246	0	0
1593649	0	0	0	9.73719	9.88732	0
1593650	0	14.9311	7.8297	46.1202	31.5142	12.8288
1593651	18.9118	23.3693	36.5377	110.176	105.045	19.2438
1593652	0	10.3876	14.3566	54.3258	24.7183	21.9922
1593653	0	0	0	13.3246	0	0
1593654	0	0	0	9.73719	9.88732	0
1593655	0	5.84232	0	32.7958	31.5142	12.8288
1593656	0	7.78957	15.6598	8.19896	8.032	9.16398
1593657	0	0	0	10.2485	7.41416	7.33096
1593659	0	0	0	10.2487	12.9744	8.24634
1593660	0	0	0	17.4228	13.5923	0
1593661	0	0	0	7.68616	8.032	9.16177
1593662	0	0	0	8.19838	0	0
1593664	0	0	0	0	9.26793	0
1593665	0	0	0	0	5.56076	0
1593848	0	0	0	6.66859	0	0
1593856	0	0	0	8.20788	0	0
1593946	0	0	0	17.9467	11.1178	0
1602313	0	0	0	9.7577	14.4065	0
1603544	0	0	0	10.292	9.41668	0
1608426	0	0	0	0	6.26256	0
1610600	0	0	0	5.07009	0	0
1612306	0	0	0	7.11076	0	0
1612651	0	0	0	5.08161	0	0
1613395	0	0	0	28.955	22.6213	0
1615612	0	0	0	7.63548	0	0
1615689	0	0	0	11.1929	0	0
1616249	0	0	0	5.08292	0	0
1617314	0	0	0	12.191	10.6027	5.57391
1617340	0	0	0	5.58807	0	0
1617349	0	0	0	13.713	21.8313	0
1617350	0	0	0	0	0	5.57204
1617944	0	0	0	16.7497	7.46601	0
1618313	0	0	0	5.0771	0	0
1620868	0	0	0	6.61602	0	0
1621222	0	0	0	0	10.5777	0
1622950	0	0	0	0	6.23832	0
1623613	0	0	0	11.6885	20.5576	0
1625282	0	0	0	7.09763	0	0
1625507	0	0	0	7.09382	0	0
1627914	0	0	0	0	9.29375	0
1630861	0	0	0	8.55458	5.52791	0
1631433	0	0	0	6.53431	7.3308	0
1631435	0	0	0	0	9.1642	0
1631925	0	0	0	17.0514	12.7989	0
1632873	0	0	0	0	8.50995	0
1633013	0	0	0	9.04457	0	0
1636260	0	0	0	8.50564	9.03208	0
1636869	0	0	0	5.0039	0	0
1637294	0	0	0	9.01075	0	0
1637836	0	0	0	15.0509	10.2448	0
1637863	0	0	0	11.5438	10.2518	0
1637905	0	0	0	6.52735	0	0
1638103	0	0	0	25.5883	22.9129	0
1638180	0	0	0	6.02023	0	0
1638807	0	0	0	9.51223	15.6294	0
1641079	0	0	0	22.008	17.4476	0
1641994	0	0	0	6.00094	5.40826	0
1643820	0	0	5.14811	0	0	0
1644870	0	0	0	5.477	0	0
1647456	0	0	0	0	6.55548	0
1649129	0	0	0	15.4597	0	0
1649984	0	0	0	18.9045	14.3317	0
1650523	0	0	0	0	8.36243	0
1651955	0	0	0	13.4903	0	0
1652020	0	0	0	17.9995	9.00521	0
1652258	0	0	0	0	9.00521	0
1655403	0	0	0	11.5156	7.26977	0
1658178	0	0	0	7.51607	0	0
1658183	0	0	0	7.51607	6.05662	0
1658188	0	0	0	10.522	10.2978	0
1660480	0	0	0	25.0779	9.69621	0
1661481	0	0	0	13.559	0	0
1661937	0	0	0	5.52391	0	0
1663414	0	0	0	13.0547	8.51901	0
1663698	0	0	0	6.52962	7.30701	0
1664517	0	0	0	8.07666	5.49502	0
1667878	0	0	0	0	7.328	0
1667956	0	0	0	5.05485	7.3267	0
1668390	0	0	0	9.10956	0	0
1668602	0	0	0	7.08753	0	0
1669244	0	0	0	6.07829	7.96805	0
1670310	0	0	0	16.257	13.4799	6.35692
1670438	0	0	0	5.08066	0	0
1670439	0	0	0	19.8132	10.4227	0
1670443	0	0	0	5.08066	0	0
1671270	0	0	0	15.7118	9.81961	0
1671542	0	0	0	6.58251	6.74322	0
1671912	0	0	0	10.1305	9.80507	0
1674541	0	0	0	19.7586	20.9394	0
1674543	0	0	0	5.57307	0	0
1678325	0	0	0	12.6631	8.01695	0
1686245	0	0	0	7.06741	0	0
1686400	0	0	0	11.1121	0	0
1686644	0	0	0	7.07663	0	0
1686667	0	0	0	16.6861	0	0
1686674	0	0	0	7.5867	0	0
1686679	0	0	0	5.56371	0	0
1687207	0	0	0	11.1506	8.62544	0
1687543	0	0	0	0	8.60821	0
1689836	0	0	0	0	6.12395	0
1690351	0	0	0	36.8146	22.0243	8.13419
1690562	0	0	0	11.0912	7.34163	0
1691244	0	0	0	7.56887	0	0
1691526	0	0	0	5.55464	0	0
1691898	0	0	0	7.0679	0	0
1692389	0	0	0	13.6259	13.5023	0
1692587	0	0	0	14.624	0	0
1693019	0	0	0	5.0478	0	0
1696353	0	0	0	6.55695	0	0
1697012	0	0	0	0	7.94979	0
1698397	0	0	0	7.01808	10.3401	0
1698588	0	0	0	7.00788	0	0
1699744	0	0	0	8.0042	8.53155	0
1702228	0	0	0	13.0312	15.2148	0
1702763	0	0	0	11.0302	6.08933	0
1708340	0	0	0	8.58165	6.70302	0
1709048	0	0	0	8.58805	0	0
1709215	0	0	0	32.339	22.5328	0
1709330	0	0	0	0	11.5756	0
1711341	0	0	0	0	8.53891	0
1712810	0	0	0	0	10.9627	0
1713405	0	0	0	17.2585	16.4345	0
1714088	0	0	0	0	7.9043	0
1715291	0	0	0	11.1467	0	14.5379
1715606	0	0	0	6.08881	6.09458	0
1715669	0	0	0	0	11.5791	0
1715910	0	0	0	7.61404	0	0
1717271	0	0	0	0	7.92235	0
1718074	0	0	0	5.59331	0	0
1718451	0	0	0	6.61214	9.76347	0
1718679	0	0	0	10.6859	12.2102	0
1725973	0	0	0	8.63794	10.9962	0
1726194	0	0	0	7.1101	0	0
1728945	0	0	0	9.06641	0	0
1729256	0	0	0	8.05006	7.29277	0
1730398	0	0	0	8.04055	0	0
1730888	0	0	0	7.53295	0	0
1731719	0	0	0	5.03187	0	0
1732159	0	0	0	24.167	13.9323	0
1732644	0	0	0	12.5843	0	0
1732745	0	0	0	20.1345	14.5421	0
1734297	0	0	0	11.0753	12.1399	0
1735760	0	0	0	8.5415	0	0
1740375	0	0	0	7.05755	0	0
1741436	0	0	0	10.606	0	0
1742225	0	0	0	12.1356	0	0
1742591	0	0	0	0	7.92899	0
1744754	0	0	0	10.0703	0	0
1745948	0	0	0	7.53766	0	0
1750742	0	0	0	6.05933	0	0
1750938	0	0	0	5.0512	0	0
1751747	0	0	0	8.08249	0	0
1754545	0	0	0	0	9.75207	0
1754659	0	0	0	5.06808	0	0
1754902	0	0	0	9.11318	11.5703	0
1755363	0	0	0	8.09399	9.73749	0
1759157	0	0	0	46.3319	15.6823	0
[truncated: 4,873 more rows]
