# Supplementary material for: Single-nucleotide resolution detection of Topo IV cleavage activity in the Escherichia coli genome with Topo-Seq
Source: Front Microbiol. 2023 Apr 6;14:1160736. doi: 10.3389/fmicb.2023.1160736 (PMC10117906; doi:10.3389/fmicb.2023.1160736)
Supplement: Supplementary file 2 [file Table_2.xlsx]

## Sheet: Sheet1
Dataset	ID	Link	Description	Study
E. coli Topo IV Topo-Seq	GSE224562	https://www.ncbi.nlm.nih.gov/geo/query/acc.cgi?acc=GSE224562	Topo IV Topo-Seq with E. coli DY330 parC-SPA and E. coli DY330 parC-SPA gyrA-S83L strains. Topo-Seq was performed for exponentially growing culture in LB at 37C. Ciprofloxacin was used to trap covalent intermediate complexes between Topo IV and DNA. Performed in triplicate.	Current study
E. coli DY330 RNA-Seq	GSE181687	https://www.ncbi.nlm.nih.gov/geo/query/acc.cgi?acc=GSE181687	Total RNA-Seq for exponentially growing culture in LB at 37C. Performed in triplicate.	Sutormin D, Galivondzhyan A, Musharova O, Travin D, Rusanova A, Obraztsova K, Borukhov S, Severinov K. Interaction between transcribing RNA polymerase and topoisomerase I prevents R-loop formation in E. coli. Nat Commun. 2022 Aug 4;13(1):4524. doi: 10.1038/s41467-022-32106-5. PMID: 35927234.
E. coli DY330 gyrA-SPA DNA-gyrase Topo-Seq	GSE117186 (GSM3273139, GSM3273141, GSM3273143)	https://www.ncbi.nlm.nih.gov/geo/query/acc.cgi?acc=GSE117186	Topo-Seq was performed for exponentially growing culture in LB at 37C. Ciprofloxacin was used to trap covalent intermediate complexes between gyrase and DNA. Performed in triplicate.	Sutormin D, Rubanova N, Logacheva M, Ghilarov D et al. Single-nucleotide-resolution mapping of DNA gyrase cleavage sites across the Escherichia coli genome. Nucleic Acids Res 2019 Feb 20;47(3):1373-1388. PMID: 30517674.
E. coli Topo IV ChIP-Seq and NorfIP	GSE75641	https://www.ncbi.nlm.nih.gov/geo/query/acc.cgi?acc=GSE75641	ChIP-Seq and NorfIP were performed for exponentially growing culture in LB at 37C. For NorfIP, norfloxacin was used to trap covalent intermediate complexes between Topo IV and DNA.	El Sayyed H, Le Chat L, Lebailly E, Vickridge E, Pages C, Cornet F, Cosentino Lagomarsino M, Espéli O. Mapping Topoisomerase IV Binding and Activity Sites on the E. coli Genome. PLoS Genet. 2016 May 12;12(5):e1006025. doi: 10.1371/journal.pgen.1006025. PMID: 27171414.
E. coli MG1655 MatP ChIP-Seq	GSE67221 (GSM1642636)	https://www.ncbi.nlm.nih.gov/geo/query/acc.cgi?acc=GSM1642636	ChIP-Seq was performed for exponentially growing culture in LB at 37C.	Nolivos S, Upton AL, Badrinarayanan A, Müller J, Zawadzka K, Wiktor J, Gill A, Arciszewska L, Nicolas E, Sherratt D. MatP regulates the coordinated action of topoisomerase IV and MukBEF in chromosome segregation. Nat Commun. 2016 Jan 28;7:10466. doi: 10.1038/ncomms10466. PMID: 26818444.
E. coli MG1655 MukB ChIP-Seq	GSE67221 (GSM1642635)	https://www.ncbi.nlm.nih.gov/geo/query/acc.cgi?acc=GSM1642635	ChIP-Seq was performed for exponentially growing culture in LB at 37C.	Nolivos S, Upton AL, Badrinarayanan A, Müller J, Zawadzka K, Wiktor J, Gill A, Arciszewska L, Nicolas E, Sherratt D. MatP regulates the coordinated action of topoisomerase IV and MukBEF in chromosome segregation. Nat Commun. 2016 Jan 28;7:10466. doi: 10.1038/ncomms10466. PMID: 26818444.
E. coli MG1655 3C dataset	GSE107301 (GSM2870427)	https://www.ncbi.nlm.nih.gov/geo/query/acc.cgi?acc=GSE107301	3C was perfromed for exponentially growing culture in LB at 37C.	Lioy VS, Cournac A, Marbouty M, Duigou S, Mozziconacci J, Espéli O, Boccard F, Koszul R. Multiscale Structuring of the E. coli Chromosome by Nucleoid-Associated and Condensin Proteins. Cell. 2018 Feb 8;172(4):771-783.e18. doi: 10.1016/j.cell.2017.12.027. Epub 2018 Jan 18. PMID: 29358050.
