# Supplementary material for: Single-nucleotide resolution detection of Topo IV cleavage activity in the Escherichia coli genome with Topo-Seq
Source: Front Microbiol. 2023 Apr 6;14:1160736. doi: 10.3389/fmicb.2023.1160736 (PMC10117906; doi:10.3389/fmicb.2023.1160736)
Supplement: Supplementary file 3 [file Table_3.xlsx]

## Sheet: DNA_content
Cell_ID	wt-Cfx	wt+Cfx	gyrA-S83L-Cfx	gyrA-S83L+Cfx
0	1.39388e+06	1.66627e+06	1.42716e+06	1.6526e+06
1	2.1725e+06	2.67584e+06	1.72763e+06	1.70945e+06
2	2.28958e+06	1.51247e+06	2.7358e+06	1.6554e+06
3	1.73622e+06	1.73274e+06	1.42413e+06	1.449e+06
4	2.03225e+06	3.05955e+06	1.16229e+06	1.51078e+06
5	2.68917e+06	1.43041e+06	836914	1.67949e+06
6	904786	1.29527e+06	1.06501e+06	2.00883e+06
7	760872	2.11535e+06	2.02836e+06	3.70772e+06
8	1.00002e+06	1.48642e+06	1.11771e+06	2.51176e+06
9	1.07774e+06	1.55368e+06	2.28117e+06	3.22195e+06
10	1.76285e+06	2.22042e+06	1.18876e+06	1.35582e+06
11	2.97618e+06	2.37192e+06	982178	1.42526e+06
12	2.01641e+06	2.51866e+06	1.69173e+06	2.21e+06
13	2.45342e+06	3.35457e+06	1.16944e+06	2.55819e+06
14	2.15068e+06	3.03863e+06	1.16579e+06	2.45477e+06
15	1.10406e+06	1.84747e+06	901233	2.84198e+06
16	2.18526e+06	2.89899e+06	1.28056e+06	3.7043e+06
17	1.24024e+06	4.23746e+06	701212	3.57226e+06
18	1.41279e+06	4.15847e+06	577144	1.65925e+06
19	1.54351e+06	1.40185e+06	526595	1.77467e+06
20	910689	1.42829e+06	353510	2.53589e+06
21	2.03373e+06	1.2897e+06	411673	1.83306e+06
22	1.96831e+06	1.26525e+06	1.06291e+06	1.53143e+06
23	2.03818e+06	1.25386e+06	2.77099e+06	2.62731e+06
24	1.70057e+06	1.25655e+06	2.2078e+06	1.80569e+06
25	1.55749e+06	1.07895e+06	1.28417e+06	3.73818e+06
26	2.66637e+06	901942	1.07077e+06	3.34526e+06
27	1.65111e+06	1.51039e+06	2.64755e+06	1.82921e+06
28	2.12869e+06	966217	908483	1.81498e+06
29	1.56483e+06	1.02081e+06	2.74465e+06	3.10689e+06
30	3.57024e+06	722849	911631	3.90166e+06
31	2.12018e+06	1.8128e+06	451420	3.37466e+06
32	2.12804e+06	864167	1.06074e+06	1.53691e+06
33	2.94082e+06	1.49231e+06	1.06074e+06	1.5949e+06
34	3.65362e+06	1.04145e+06	1.05067e+06	1.64354e+06
35	2.01428e+06	3.15555e+06	1.50735e+06	1.73338e+06
36	1.72602e+06	3.31001e+06	867088	3.16788e+06
37	1.26061e+06	2.45151e+06	867088	2.74052e+06
38	1.49347e+06	3.32466e+06	902695	2.46174e+06
39	1.70649e+06	2.60639e+06	953804	3.77604e+06
40	1.57335e+06	1.99302e+06	3.39482e+06	2.77547e+06
41	1.28321e+06	2.16243e+06	912468	2.29308e+06
42	2.00095e+06	1.91872e+06	1.64437e+06	1.04633e+06
43	1.07789e+06	2.9045e+06	1.40266e+06	3.06563e+06
44	718971	2.18906e+06	1.38559e+06	1.66272e+06
45	625814	1.95836e+06	1.35909e+06	2.27876e+06
46	1.0683e+06	1.98817e+06	1.32097e+06	2.99217e+06
47	1.66653e+06	2.19112e+06	1.86186e+06	2.28782e+06
48	2.5599e+06	1.96743e+06	1.17252e+06	1.17251e+06
49	3.14738e+06	1.50156e+06	1.24482e+06	1.43014e+06
50	2.43588e+06	2.52184e+06	1.42286e+06	1.56371e+06
51	2.68012e+06	4.00632e+06	1.53714e+06	2.019e+06
52	3.15504e+06	2.41029e+06	1.14743e+06	1.31001e+06
53	1.83475e+06	4.51714e+06	1.07523e+06	1.25144e+06
54	2.73166e+06	1.12351e+06	1.01657e+06	1.6172e+06
55	2.94379e+06	1.46475e+06	4.43113e+06	1.98109e+06
56	1.58653e+06	3.36587e+06	1.49358e+06	1.81366e+06
57	1.53757e+06	1.65964e+06	1.18296e+06	1.77642e+06
58	2.11499e+06	1.79282e+06	478609	1.49657e+06
59	1.19502e+06	794380	2.13029e+06	1.68552e+06
60	2.85149e+06	2.67609e+06	883819	1.5091e+06
61	2.73285e+06	1.18201e+06	1.11598e+06	1.44104e+06
62	1.30677e+06	1.06693e+06	1.07146e+06	1.25418e+06
63	1.75927e+06	1.34699e+06	1.16717e+06	1.26194e+06
64	3.14273e+06	1.23446e+06	1.37675e+06	1.37023e+06
65	2.06911e+06	2.81823e+06	2.55837e+06	1.98886e+06
66	1.4994e+06	1.05856e+06	1.98671e+06	1.81735e+06
67	1.61879e+06	1.57154e+06	1.39888e+06	1.48565e+06
68	1.57925e+06	1.70014e+06	2.22221e+06	1.70617e+06
69	1.27271e+06	2.3041e+06	2.12042e+06	1.76465e+06
70	1.80463e+06	1.37069e+06	1.37937e+06	2.73959e+06
71	1.81529e+06	1.49629e+06	2.11807e+06	1.23054e+06
72	2.73319e+06	1.78971e+06	1.85667e+06	1.03116e+06
73	1.86085e+06	1.69428e+06	943709	2.24981e+06
74	1.91999e+06	2.68996e+06	1.10647e+06	1.99665e+06
75	3.07592e+06	2.76888e+06	1.56233e+06	3.64436e+06
76	1.68661e+06	1.99537e+06	1.62315e+06	1.62477e+06
77	2.60563e+06	1.69695e+06	1.55675e+06	3.15945e+06
78	1.44867e+06	2.35417e+06	1.307e+06	2.83572e+06
79	1.08865e+06	1.58457e+06	1.01635e+06	1.85329e+06
80	1.01787e+06	1.57654e+06	1.23382e+06	3.63145e+06
81	2.18768e+06	2.85905e+06	1.39909e+06	3.3183e+06
82	1.30163e+06	2.66725e+06	2.16339e+06	1.7246e+06
83	902122	2.82511e+06	2.19349e+06	1.67083e+06
84	2.55409e+06	1.29918e+06	1.71711e+06	2.71949e+06
85	1.16841e+06	2.88793e+06	1.38734e+06	1.80268e+06
86	1.34381e+06	2.48615e+06	2.33356e+06	1.69816e+06
87	2.06554e+06	5.95728e+06	1.52125e+06	1.73387e+06
88	336582	2.12434e+06	1.1584e+06	2.18083e+06
89	981005	2.52618e+06	1.12582e+06	3.8701e+06
90	1.60544e+06	2.20169e+06	1.00424e+06	4.69906e+06
91	2.00767e+06	2.47059e+06	1.42902e+06	2.20619e+06
92	1.71452e+06	3.0581e+06	989086	2.79857e+06
93	1.0259e+06	2.25273e+06	3.39418e+06	2.70956e+06
94	1.26806e+06	2.17928e+06	941318	4.22495e+06
95	954985	2.45725e+06	946778	3.20078e+06
96	1.18939e+06	1.4279e+06	911533	1.58873e+06
97	2.39275e+06	2.78889e+06	1.41861e+06	1.09067e+06
98	910317	2.49942e+06	637009	1.41494e+06
99	4.52279e+06	864845	3.06041e+06	1.20436e+06
100	1.50557e+06	1.49838e+06	3.29271e+06	2.96403e+06
101	692864	1.88201e+06	1.58365e+06	3.8734e+06
102	795841	2.16669e+06	1.28092e+06	2.90404e+06
103	940828	1.49527e+06	1.29305e+06	976465
104	844498	2.05382e+06	1.57819e+06	998913
105	2.29932e+06	1.84656e+06	1.1244e+06	1.51225e+06
106	303241	2.28707e+06	1.6337e+06	2.22358e+06
107	930849	1.24712e+06	1.99207e+06	1.73185e+06
108	905697	1.55058e+06	1.58709e+06	1.27775e+06
109	1.0018e+06	1.44207e+06	2.15347e+06	1.71785e+06
110	1.33384e+06	1.58401e+06	4.06491e+06	777157
111	1.8965e+06	1.27743e+06	1.22614e+06	843444
112	1.17839e+06	1.30959e+06	1.5476e+06	1.14237e+06
113	1.07532e+06	2.75083e+06	605893	2.3623e+06
114	925039	1.17828e+06	533701	2.09361e+06
115	1.35062e+06	1.00898e+06	1.11463e+06	857881
116	1.5463e+06	3.07511e+06	2.16412e+06	1.18094e+06
117	643721	2.25633e+06	2.02673e+06	1.05349e+06
118	902019	1.87612e+06	1.01479e+06	993923
119	851741	1.81346e+06	1.76907e+06	1.66591e+06
120	2.12397e+06	1.71841e+06	1.52216e+06	1.05818e+06
121	3.92711e+06	2.29333e+06	1.83173e+06	698727
122	820815	1.79559e+06	1.6839e+06	846710
123	869415	1.88472e+06	972273	825922
124	1.61847e+06	1.80155e+06	1.0644e+06	1.37407e+06
125	751833	1.83051e+06	2.00392e+06	1.25016e+06
126	1.49429e+06	4.26599e+06	1.77351e+06	2.43792e+06
127	649477	3.27477e+06	2.15794e+06	1.80264e+06
128	885747	1.70731e+06	2.66403e+06	1.07728e+06
129	695137	1.92283e+06	1.67652e+06	1.11593e+06
130	4.25668e+06	1.5699e+06	1.64576e+06	1.24764e+06
131	1.50977e+06	1.99001e+06	1.59804e+06	2.51009e+06
132	1.14479e+06	4.51754e+06	1.79263e+06	1.90727e+06
133	905281	1.48251e+06	1.43656e+06	1.63437e+06
134	745545	2.23118e+06	1.72212e+06	1.12645e+06
135	1.55822e+06	1.17532e+06	2.56277e+06	1.18192e+06
136	2.07456e+06	1.4359e+06	1.76816e+06	3.3727e+06
137	407219	1.27623e+06	1.46284e+06	1.9336e+06
138	1.06937e+06	1.60644e+06	1.32635e+06	1.21364e+06
139	1.17291e+06	1.45099e+06	2.26209e+06	1.27081e+06
140	1.62663e+06	1.54318e+06	1.60281e+06	1.70908e+06
141	1.91933e+06	2.32e+06	1.252e+06	803494
142	1.20257e+06	1.29528e+06	1.92608e+06	948311
143	1.305e+06	2.30412e+06	2.3196e+06	1.2054e+06
144	926631	2.72201e+06	1.6691e+06	1.16558e+06
145	990883	1.99386e+06	1.27498e+06	1.65657e+06
146	895480	1.73309e+06	3.21024e+06	2.00738e+06
147	522274	922278	1.27173e+06	1.67565e+06
148	449857	877320	2.50616e+06	991815
149	1.2215e+06	1.69283e+06	1.56952e+06	1.15511e+06
150	1.95569e+06	1.79441e+06	1.31196e+06	1.71646e+06
151	938875	1.54991e+06	2.01404e+06	2.02923e+06
152	996441	1.3922e+06	1.45106e+06	2.10991e+06
153	883460	1.44572e+06	2.13863e+06	1.49928e+06
154	2.03172e+06	841815	1.66509e+06	2.2024e+06
155	1.91079e+06	1.19448e+06	1.45798e+06	1.65821e+06
156	1.47541e+06	789716	1.48475e+06	1.52156e+06
157	1.16661e+06	1.69192e+06	1.55882e+06	704787
158	1.13741e+06	3.64629e+06	2.01211e+06	704679
159	1.10512e+06	1.15772e+06	1.71703e+06	676277
160	1.78582e+06	1.3506e+06	2.41222e+06	780263
161	1.70298e+06	1.52354e+06	970597	733720
162	1.20816e+06	795093	1.02444e+06	599734
163	3.60358e+06	765269	2.69734e+06	2.63287e+06
164	1.74733e+06	1.14929e+06	1.23956e+06	1.44368e+06
165	1.95339e+06	956536	691607	2.38517e+06
166	1.92607e+06	1.08169e+06	860598	2.95099e+06
167	1.80492e+06	920754	1.85927e+06	1.23134e+06
168	1.03519e+06	1.48416e+06	1.11967e+06	1.14949e+06
169	8.44521e+06	1.94893e+06	634612	1.02853e+06
170	1.84876e+06	1.18084e+06	861473	1.08962e+06
171	2.6478e+06	1.40838e+06	1.51983e+06	1.38853e+06
172	1.9963e+06	1.83755e+06	1.95907e+06	3.8879e+06
173	1.44587e+06	1.98039e+06	1.26273e+06	999109
174	2.05156e+06	1.31549e+06	1.8698e+06	1.14295e+06
175	3.84367e+06	2.10076e+06	1.98199e+06	1.13899e+06
176	3.48116e+06	2.06576e+06	1.48731e+06	1.28635e+06
177	1.35501e+06	1.53879e+06	1.56677e+06	1.18479e+06
178	436357	1.95602e+06	917580	1.08745e+06
179	682248	805964	1.08041e+06	2.01586e+06
180	1.03301e+06	1.33088e+06	2.07643e+06	4.49054e+06
181	2.6581e+06	1.13665e+06	1.43548e+06	1.22591e+06
182	1.44379e+06	1.31106e+06	1.58555e+06	1.51236e+06
183	1.33597e+06	925904	1.21459e+06	1.264e+06
184	1.72289e+06	2.15702e+06	2.39554e+06	1.26954e+06
185	668828	1.82241e+06	2.68249e+06	976776
186	2.09843e+06	1.09517e+06	3.03233e+06	1.31908e+06
187	3.0897e+06	1.67037e+06	2.38935e+06	1.52918e+06
188	2.115e+06	925025	1.91443e+06	1.92461e+06
189	1.52592e+06	966778	1.72226e+06	2.16034e+06
190	4.65821e+06	2.11907e+06	944926	2.54691e+06
191	4.36451e+06	2.02303e+06	2.41663e+06	2.27238e+06
192	3.29295e+06	1.43038e+06	808104	1.53436e+06
193	3.34516e+06	1.18594e+06	1.21818e+06	1.19979e+06
194	2.04972e+06	2.40481e+06	1.02423e+06	2.55448e+06
195	2.15426e+06	2.58944e+06	1.19347e+06	1.09098e+06
196	3.71282e+06	1.29947e+06	1.85338e+06	1.47825e+06
197	3.21094e+06	1.17251e+06	939720	1.27686e+06
198	2.62192e+06	1.41482e+06	964630	1.17768e+06
199	1.71637e+06	1.5995e+06	1.323e+06	1.24701e+06
200	2.46151e+06	1.55474e+06	1.49403e+06	1.42027e+06
201	2.68118e+06	2.28856e+06	1.90067e+06	2.81062e+06
202	2.6663e+06	1.47556e+06	1.04891e+06	2.73981e+06
203	2.15265e+06	1.23523e+06	1.93812e+06	1.41576e+06
204	1.9583e+06	1.34835e+06	1.92984e+06	1.58269e+06
205	2.12772e+06	1.33697e+06	1.15716e+06	2.23162e+06
206	2.1939e+06	1.31144e+06	529675	2.26455e+06
207	4.31656e+06	1.3539e+06	1.83805e+06	1.84531e+06
208	3.65188e+06	2.21719e+06	1.13921e+06	672738
209	864614	2.0608e+06	1.13609e+06	740613
210	1.02751e+06	1.28609e+06	3.50995e+06	1.14812e+06
211	1.00733e+06	2.70028e+06	1.1088e+06	876190
212	761558	2.24434e+06	1.17677e+06	974492
213	923283	1.62641e+06	1.23304e+06	1.21514e+06
214	992006	1.03612e+06	2.21777e+06	2.16687e+06
215	866471	1.7701e+06	2.34114e+06	980204
216	2.12171e+06	1.59664e+06	2.65281e+06	1.23807e+06
217	1.1832e+06	1.6668e+06	2.66762e+06	1.15193e+06
218	1.86141e+06	1.79726e+06	2.34929e+06	1.26629e+06
219	1.66531e+06	1.76361e+06	2.5184e+06	917690
220	1.53504e+06	1.02744e+06	1.14883e+06	1.76005e+06
221	2.82348e+06	1.02663e+06	1.53231e+06	1.75016e+06
222	2.49251e+06	977451	3.22898e+06	1.40551e+06
223	1.88889e+06	1.60781e+06	1.24943e+06	820957
224	2.0594e+06	1.18106e+06	2.37308e+06	753106
225	3.28768e+06	2.23731e+06	1.39013e+06	1.83601e+06
226	2.6092e+06	1.96277e+06	3.81001e+06	1.0322e+06
227	1.17636e+06	1.91178e+06	1.22232e+06	1.0643e+06
228	942760	1.56118e+06	1.95173e+06	1.24657e+06
229	4.1616e+06	1.56661e+06	1.34162e+06	1.08245e+06
230	3.95933e+06	1.16306e+06	2.61248e+06	1.92743e+06
231	4.48946e+06	1.08759e+06	2.2718e+06	811502
232	3.60753e+06	1.42723e+06	2.44449e+06	839104
233	1.45461e+06	2.01384e+06	1.17557e+06	874225
234	2.12917e+06	1.62115e+06	1.30795e+06	539832
235	2.81131e+06	1.15753e+06	799881	559644
236	3.84265e+06	1.08105e+06	1.1195e+06	1.94866e+06
237	4.61892e+06	1.33457e+06	1.82762e+06	1.68863e+06
238	3.05257e+06	1.37323e+06	871233	854446
239	3.62103e+06	1.58605e+06	1.41516e+06	864172
240	2.60687e+06	2.72603e+06	4.45699e+06	1.39372e+06
241	3.03995e+06	2.37645e+06	1.31878e+06	2.04224e+06

## Sheet: Cell_length
Cell_ID	wt-Cfx, mkm	wt+Cfx, mkm	gyrA-S83L-Cfx, mkm	gyrA-S83L+Cfx, mkm
0	3.43725	2.24754	3.9371	2.63377
1	3.5537	3.09819	2.61275	2.64471
2	4.29188	2.57326	3.09565	2.50181
3	4.20101	2.54862	2.33688	2.44449
4	4.06123	5.38623	3.85761	2.42942
5	4.92116	2.58949	3.51507	2.56196
6	3.13609	2.84739	4.22536	2.6929
7	3.23826	3.46391	4.48167	4.31022
8	3.02703	2.20391	3.04775	3.01399
9	3.52623	2.3029	6.41377	4.68558
10	3.235	4.14819	2.49341	2.40884
11	4.60587	3.38804	2.94261	2.57014
12	4.19355	3.55739	4.17594	3.05812
13	4.42268	3.94848	2.81862	3.85152
14	4.43986	3.96174	4.26304	3.2187
15	3.32464	3.28572	2.68116	3.43725
16	4.22094	5.45601	4.42268	4.505
17	2.76884	4.81159	3.16529	4.575
18	3.07435	6.54145	2.98775	2.17993
19	4.5213	2.40884	2.31543	2.05978
20	3.22848	2.32899	2.04572	4.47225
21	3.87051	2.49029	4.60645	3.05464
22	4.47225	2.46804	3.02703	2.69681
23	4.97899	2.51232	6.48138	4.33391
24	2.82239	2.68993	4.32478	3.3779
25	2.96036	2.05978	3.22848	5.43239
26	4.11768	1.95116	2.53522	4.25319
27	3.17601	3.92174	4.0437	2.84094
28	3.92239	2.47333	3.34043	2.66449
29	2.84739	2.65754	4.30717	4.14819
30	4.2129	2.20029	4.3863	4.70181
31	4.6087	4.00848	3.79312	4.06377
32	3.57725	2.06109	3.45174	2.81399
33	4.43514	2.56406	3.45174	2.32
34	5.22993	2.25688	3.73029	2.75935
35	3.65855	3.48203	3.73522	2.63377
36	4.3863	4.63087	3.11681	4.94667
37	2.84094	4.44572	3.11681	4.14058
38	3.43572	4.00848	2.93457	4.80942
39	3.92775	3.63478	2.90036	5.9579
40	3.74087	2.66449	4.73739	4.06442
41	4.35326	3.03486	2.11014	3.01399
42	4.00913	2.94971	4.60645	2.32899
43	4.58877	3.235	2.79717	4.53986
44	2.82978	3.14949	3.15942	2.76217
45	3.33645	2.73449	3.07094	2.98775
46	3.5329	3.24471	4.02746	3.85899
47	3.44486	3.30007	3.79384	2.98775
48	4.44572	3.14616	3.56841	2.07507
49	5.1163	2.75457	3.31833	2.41862
50	3.94246	3.74362	4.40783	2.34138
51	4.09145	4.15833	3.58014	2.53101
52	5.87	3.28572	2.88493	2.14594
53	3.63188	6.27594	2.77449	1.77645
54	4.17283	3.05725	2.46804	2.7287
55	4.91312	3.15942	3.77928	2.65754
56	3.48428	4.38152	3.41812	2.42942
57	2.17993	2.52377	3.2737	2.53101
58	2.59254	2.37696	3.71196	2.56812
59	2.79717	3.3779	5.73014	2.58949
60	3.73522	4.44159	2.38362	2.58949
61	4.46464	3.03486	2.54449	2.44449
62	2.25688	2.98775	2.95681	2.20029
63	2.3029	2.43587	2.52377	2.265
64	4.5021	2.38362	2.14109	3.51203
65	3.25442	3.94377	6.42029	3.7013
66	2.61275	2.13123	5.15717	2.82239
67	3.46391	2.49551	4.74348	2.36036
68	2.51543	3.30565	3.30007	2.96036
69	2.77355	3.95841	4.43391	2.95065
70	3.69	2.73159	4.92116	3.62174
71	3.30804	2.79623	2.93188	2.53101
72	4.21601	2.4987	4.8437	2.19312
73	3.35688	2.33688	2.41319	3.60645
74	3.2358	4.00848	3.04435	3.37174
75	4.41732	3.82623	2.49029	4.96681
76	3.62319	3.07609	6.13935	1.9779
77	3.99601	2.84739	3.08123	3.65783
78	3.14616	3.38804	3.69	3.81862
79	2.37696	2.73449	4.17094	2.40007
80	2.3029	2.29152	2.79899	4.88529
81	4.505	3.67928	3.01399	4.62406
82	2.92471	4.0013	4.90029	2.42188
83	3.86717	5.21942	5.41543	2.67232
84	5.12399	2.46804	3.95841	3.17848
85	4.57957	3.17848	2.32	2.32
86	4.10493	4.3779	3.13696	2.57326
87	4.69899	10.9947	2.56094	2.69681
88	3.31913	4.01899	2.68116	2.53623
89	3.34043	3.46391	2.14594	2.66645
90	2.16181	3.24471	3.83717	4.30899
91	2.33688	3.45703	3.82891	3.32543
92	4.71848	3.58529	3.45478	3.28094
93	3.95442	2.20029	4.44928	3.31913
94	4.06833	2.33688	3.28094	4.44928
95	2.70746	3.47899	3.20891	5.0021
96	3.98551	2.54036	3.6671	2.6958
97	10.7239	3.18181	4.78754	2.13123
98	3.72116	4.20167	2.67232	2.39239
99	7.9387	3.34043	5.66565	2.57326
100	4.28514	2.84739	5.66565	4.10043
101	3.59993	2.61775	4.46993	5.84942
102	3.43652	2.88587	3.62971	3.85152
103	3.49029	2.98775	3.00616	2.81862
104	4.02942	2.72775	3.13942	2.71616
105	7.91949	3.56841	3.34043	4.51957
106	2.32	3.56471	4.44399	4.76558
107	2.75935	2.53623	5.31558	3.86514
108	3.58014	2.38362	3.98551	2.91304
109	4.02942	2.67232	4.27964	3.31203
110	3.12942	2.82978	5.31558	2.11268
111	5.58725	1.9579	3.25681	2.06109
112	4.76333	2.4987	6.34913	2.78775
113	2.95775	4.12022	3.30007	4.74732
114	2.6958	2.53101	3.00268	4.02746
115	3.09565	2.42942	3.59848	2.53101
116	4.46464	3.90232	3.96174	2.90036
117	3.34043	3.00268	4.83558	2.57014
118	2.54862	2.59254	3.62391	2.21812
119	2.74978	2.43587	3.92377	5.50203
120	3.59848	2.53101	4.35022	3.75768
121	4.74181	2.82978	4.51957	3.53587
122	4.47638	2.41862	4.25319	3.45703
123	4.50558	3.46993	4.2821	3.69565
124	5.65123	2.56196	2.92109	3.24065
125	2.59761	2.56196	4.60246	3.38333
126	5.59145	6.52536	4.18848	5.44254
127	2.68116	3.80833	5.10804	3.72609
128	4.68558	3.51804	5.28587	2.81862
129	3.26087	3.85899	4.36348	2.46058
130	3.69	3.28652	2.42188	3.43341
131	4.39167	3.32464	3.14616	4.49159
132	3.25681	4.46464	4.14058	3.6621
133	3.44261	3.04174	3.13529	3.90232
134	2.97457	3.75971	3.60428	2.43486
135	4.73848	2.92109	5.35696	2.56406
136	3.30804	2.93094	4.74348	4.69899
137	2.37696	2.42942	4.8858	4.06833
138	2.49341	2.91304	4.34906	2.21225
139	4.46283	2.82978	4.54848	2.28804
140	4.05601	2.63775	5.37304	3.62971
141	5.39986	3.89558	3.46768	2.01341
142	2.4121	3.00268	4.36949	2.50181
143	6.83812	4.78536	2.95594	2.61275
144	4.21601	4.27783	3.17848	2.49341
145	5.08797	3.78275	3.30007	3.74087
146	3.9908	3.94246	2.7287	3.64123
147	2.6929	2.4987	3.59775	3.66428
148	2.68217	2.70746	6.29225	2.56406
149	3.24797	4.09145	3.56841	2.58036
150	4.13109	5.7971	3.92239	3.3779
151	4.51899	3.70986	5.39355	4.66761
152	2.47862	3.07094	4.02942	3.87935
153	2.35928	4.21848	6.36406	3.9371
154	2.81862	2.83442	4.71848	4.80942
155	3.07094	3.14616	4.2129	4.59043
156	3.94377	2.78775	4.47928	3.66928
157	2.66051	4.5508	3.9063	2.81862
158	2.56812	9.94101	4.50732	2.51543
159	4.3629	3.58674	3.62319	2.61275
160	4.28761	3.88406	5.57551	2.69681
161	4.15326	4.00848	3.18594	2.3737
162	4.69283	2.61775	4.49978	2.53101
163	5.34659	2.63775	2.76217	4.40601
164	4.30899	2.79623	2.53101	4.1463
165	4.62406	2.24986	2.74312	4.66138
166	3.25522	1.72855	2.52377	5.1163
167	2.98428	1.72246	5.04652	2.58645
168	2.73928	2.71616	2.61877	2.47652
169	12.9907	2.7287	2.23232	2.51543
170	3.49029	2.40884	2.79899	2.4121
171	3.81384	2.04957	2.50181	3.41275
172	3.59775	3.18348	5.85341	3.90232
173	4.08696	3.18348	4.23275	3.27696
174	2.95681	2.51123	4.25319	3.53884
175	4.17283	2.87123	6.50804	2.87674
176	4.11964	3.43652	3.44486	3.07094
177	2.46804	2.58645	4.80942	3.24471
178	2.4121	3.82413	3.46993	2.91659
179	3.11254	2.35145	3.51804	3.38333
180	3.14616	2.34138	4.22036	3.5537
181	3.57725	2.43486	3.9908	2.47862
182	2.79899	3.18348	3.82623	2.67232
183	3.46391	2.92109	2.97457	2.6958
184	2.63775	4.37014	2.45203	3.12601
185	3.01399	2.93638	2.45203	2.62572
186	4.5508	3.51804	6.76399	2.94261
187	5.30768	4.13109	2.56406	3.71833
188	2.56812	2.98775	5.13623	4.07993
189	3.72116	2.60167	4.51899	3.9458
190	4.76833	4.18848	3.2187	4.49159
191	3.60428	4.2408	4.94507	3.72116
192	4.26246	2.47862	4.73181	3.31123
193	4.23275	2.34138	4.51377	3.00616
194	2.3737	2.93457	3.6671	5.08797
195	2.66449	3.66428	2.53623	2.70551
196	5.34319	2.68217	3.39652	2.99304
197	3.43652	2.61275	3.52623	3.2737
198	2.85565	3.2179	3.18594	2.75457
199	2.79899	3.2163	4.51957	2.74312
200	3.50536	3.24065	2.81399	2.74978
201	3.82891	3.37486	5.10804	3.85152
202	4.46993	2.97457	3.8042	4.65181
203	2.93457	2.61775	4.35746	2.98775
204	3.03486	3.49029	4.27783	2.66449
205	3.30486	3.27696	2.97899	4.29254
206	2.98775	3.14616	2.93094	2.81399
207	4.35986	3.58529	5.67486	4.18159
208	3.07522	3.53964	4.14058	3.57725
209	3.04775	4.18094	3.34594	3.39652
210	2.90036	2.46804	8.10333	3.79935
211	2.88768	3.49029	3.50609	2.82239
212	2.61275	2.43486	2.66449	2.67333
213	5.29036	2.59254	2.73159	3.94246
214	3.86514	1.9779	4.76833	4.96152
215	3.55739	3.52623	4.60587	3.18348
216	4.90029	3.13609	5.79167	2.97899
217	3.59775	3.30486	6.31101	4.90029
218	5.13471	3.65565	5.57551	4.3863
219	6.05797	3.61014	5.97768	3.30804
220	2.39239	2.72775	3.2737	4.41493
221	4.44572	2.72297	3.89558	2.89312
222	4.29065	2.68993	5.59428	4.46522
223	4.22536	3.82688	3.30565	3.50833
224	3.07435	2.67232	5.12399	3.32464
225	3.74362	3.68145	5.06312	4.43391
226	4.40783	3.425	3.81384	2.93457
227	1.72246	3.18594	3.56841	2.75935
228	1.78971	3.44486	5.31558	4.28514
229	3.9908	3.25681	2.86667	3.63478
230	3.79659	2.38362	4.27783	4.42442
231	4.3779	2.53623	6.67022	2.75457
232	4.60254	3.73029	4.05087	3.35065
233	2.2379	5.13471	2.85841	4.51377
234	2.67377	3.97957	3.30486	2.65754
235	2.94326	3.02703	3.11254	2.4121
236	3.65239	2.83442	3.31913	4.32478
237	4.93355	2.89855	5.73014	5.30225
238	4.84696	3.13529	3.65783	2.81399
239	4.43522	4.11964	4.5021	2.93094
240	2.70399	4.84428	14.2362	3.04775
241	3.06833	4.66703	3.08123	4.17152
